# Supplementary material for: Results from ten years of post-market environmental monitoring of genetically modified MON 810 maize in the European Union
Source: PLoS One. 2020 Apr 24;15(4):e0217272. doi: 10.1371/journal.pone.0217272 (PMC7182268; doi:10.1371/journal.pone.0217272)
Supplement: S7 File — (XLSX) [file pone.0217272.s007.xlsx]

## Sheet: Variable
Topic	Varname	Label	Valuelabel
Record description	RecNo	Record number
Record description	IDFarmer	Farmer ID
Record description	Repeat	Number of repeated observation
Record description	CODEYEAR	Year
Record description	CODECOUN	Country (two letter)
Agronomic practices	AGCHCROR	Crop rotation	-1 = no statement, 1 = as usual, 2 = changed
Agronomic practices	AGPPLAN	Time of planting	-1 = no statement, 1 = as usual, 2 = earlier, 3 = later
Agronomic practices	AGPTILP	Tillage and planting technique	-1 = no statement, 1 = as usual, 2 = changed
Agronomic practices	AGPINSC	Insect control practices	-1 = no statement, 1 = similar, 2 = different
Agronomic practices	AGPHERC	Weed control practices	-1 = no statement, 1 = similar, 2 = different
Agronomic practices	AGPFUNC	Fungal control practices	-1 = no statement, 1 = similar, 2 = different
Agronomic practices	AGPMBCP	Maize Borer control practice	-1 = no statement, 1 = similar, 2 = changed
Agronomic practices	AGPFERT	Fertilizer application	-1 = no statement, 1 = similar, 2 = changed
Agronomic practices	AGPIRRI	Irrigation Practices	-1 = no statement, 1 = similar, 2 = changed
Agronomic practices	AGPHARV	Time of harvest	-1 = no statement, 1 = as usual, 2 = earlier, 3 = later
Characteristics in the field	CHAGERMI	Germination vigor	-1 = no statement, 1 = as usual, 2 = more vigourous, 3 = less vigourous
Characteristics in the field	CHAEMERG	Time to emergence	-1 = no statement, 1 = as usual, 2 = accelerated, 3 = delayed
Characteristics in the field	CHAFLOWE	Time to male flowering	-1 = no statement, 1 = as usual, 2 = accelerated, 3 = delayed
Characteristics in the field	CHADEVEL	Plant growth and development	-1 = no statement, 1 = as usual, 2 = accelerated, 3 = delayed
Characteristics in the field	CHAINSRL	Incidence of stalk / root lodging	-1 = no statement, 1 = as usual, 2 = more often, 3 = less often
Characteristics in the field	CHAMATUR	Time to maturity	-1 = no statement, 1 = as usual, 2 = accelerated, 3 = delayed
Characteristics in the field	CHAYIELD	Yield	-1 = no statement, 1 = as usual, 2 = higher yield, 3 = lower yield
Characteristics in the field	CHAVOLUN	Occurrence of volunteers	-1 = no statement, 1 = as usual, 2 = more often, 3 = less often
Environment and wildlife	DISSUSCE	Disease susceptibility	-1 = no statement, 1 = as usual, 2 = more susceptible, 3 = less susceptible
Environment and wildlife	PESTSUS	Pest susceptibility	-1 = no statement, 1 = as usual, 2 = more susceptible, 3 = less susceptible
Environment and wildlife	WEEDPRES	Weed pressure	-1 = no statement, 1 = as usual, 2 = more weeds, 3 = less weeds
Environment and wildlife	INSECTOC	Occurrence of insects	-1 = no statement, 1 = as usual, 2 = more, 3 = less, 4 = do not know
Environment and wildlife	BIRDOCC	Occurrence of birds	-1 = no statement, 1 = as usual, 2 = more, 3 = less, 4 = do not know
Environment and wildlife	MAMOCC	Occurrence of mamals	-1 = no statement, 1 = as usual, 2 = more, 3 = less, 4 = do not know
Environment and wildlife	FEEDPERF	Performance of animals	-1 = no statement, 1 = as usual, 2 = different, 3 = do not know

## Sheet: Data
RecNo	IDFarmer	Repeat	CODEYEAR	CODECOUN	AGCHCROR	AGPPLAN	AGPTILP	AGPINSC	AGPHERC	AGPFUNC	AGPMBCP	AGPFERT	AGPIRRI	AGPHARV	CHAGERMI	CHAEMERG	CHAFLOWE	CHADEVEL	CHAINSRL	CHAMATUR	CHAYIELD	CHAVOLUN	DISSUSCE	PESTSUS	WEEDPRES	INSECTOC	BIRDOCC	MAMOCC	FEEDPERF
1	100	1	2006	ES	-1	1	1	2	1	1	-1	1	1	1	1	1	1	1	3	3	2	3	1	1	1	-1	-1	-1	-1
2	101	1	2006	ES	-1	1	1	2	1	1	-1	1	1	1	3	1	1	1	3	1	2	3	2	2	1	-1	-1	-1	-1
3	102	1	2006	ES	-1	3	1	1	1	1	-1	1	1	1	1	1	1	2	3	1	1	3	1	1	1	-1	-1	-1	-1
4	103	1	2006	ES	-1	1	1	2	1	1	-1	1	1	1	1	1	1	1	3	1	2	3	1	1	1	-1	-1	-1	-1
5	104	1	2006	ES	-1	1	1	1	1	1	-1	1	1	1	1	1	1	2	3	3	2	3	1	1	1	-1	-1	-1	-1
6	105	1	2006	ES	-1	1	1	1	1	1	-1	1	1	3	1	3	3	1	3	3	1	3	1	1	1	-1	-1	-1	-1
7	106	1	2006	ES	-1	1	1	1	1	1	-1	1	1	3	1	1	1	1	3	1	1	1	1	1	1	-1	-1	-1	-1
8	107	1	2006	ES	-1	1	1	2	1	1	-1	1	1	1	1	1	1	1	3	3	2	1	1	1	1	-1	-1	-1	1
9	108	1	2006	ES	-1	1	1	2	1	1	-1	1	1	1	2	1	1	1	3	1	1	1	1	1	1	-1	-1	-1	-1
10	109	1	2006	ES	-1	1	1	1	1	1	-1	1	1	1	1	1	1	1	3	1	2	1	1	1	1	-1	-1	-1	-1
11	110	1	2006	ES	-1	1	1	1	1	1	-1	1	1	1	1	1	1	1	3	1	2	1	1	1	1	-1	-1	-1	-1
12	111	1	2006	ES	-1	1	1	2	1	1	-1	1	1	1	1	1	1	1	3	1	2	1	1	1	1	-1	-1	-1	-1
13	112	1	2006	ES	-1	1	1	2	1	1	-1	1	1	1	3	3	1	1	3	1	2	3	2	1	1	-1	-1	-1	-1
14	113	1	2006	ES	-1	1	1	1	1	1	-1	1	1	1	1	1	1	1	1	1	2	1	1	1	1	-1	-1	-1	-1
15	114	1	2006	ES	-1	1	1	1	1	1	-1	1	1	1	1	1	1	1	1	3	1	1	1	1	1	-1	-1	-1	-1
16	115	1	2006	ES	-1	1	1	1	1	1	-1	1	1	1	1	1	1	1	3	1	1	1	1	1	1	-1	-1	-1	-1
17	116	1	2006	ES	-1	1	1	2	1	1	-1	1	1	1	1	1	1	1	3	1	2	1	1	1	1	-1	-1	-1	-1
18	117	1	2006	ES	-1	1	1	2	1	1	-1	1	1	1	1	1	1	1	3	1	2	3	1	1	1	-1	-1	-1	-1
19	118	1	2006	ES	-1	1	1	2	1	1	-1	1	1	1	1	1	1	1	3	1	2	3	1	1	1	-1	-1	-1	-1
20	119	1	2006	ES	-1	1	1	1	1	1	-1	1	1	1	1	1	1	1	3	1	2	3	1	1	1	-1	-1	-1	-1
21	120	1	2006	ES	-1	3	1	2	1	1	-1	1	1	1	3	3	1	1	3	3	2	3	1	1	1	-1	-1	-1	-1
22	121	1	2006	ES	-1	1	1	2	1	1	-1	1	1	1	1	1	1	1	3	1	2	1	1	1	1	-1	-1	-1	-1
23	122	1	2006	ES	-1	1	1	2	1	1	-1	1	1	1	1	1	1	1	3	1	2	1	1	1	1	-1	-1	-1	-1
24	123	1	2006	ES	-1	1	1	2	1	1	-1	1	1	1	1	1	1	1	3	1	2	1	1	1	1	-1	-1	-1	-1
25	124	1	2006	ES	-1	3	1	2	1	1	-1	2	2	1	1	1	1	1	3	1	3	3	2	2	1	-1	-1	-1	-1
26	125	1	2006	ES	-1	1	1	1	1	1	-1	1	1	1	1	1	1	1	3	1	2	1	1	1	1	-1	-1	-1	-1
27	126	1	2006	ES	-1	1	1	1	1	1	-1	1	1	1	3	1	1	1	1	1	2	1	1	1	1	-1	-1	-1	-1
28	127	1	2006	ES	-1	1	1	2	1	1	-1	1	1	1	2	1	1	1	3	1	2	1	3	1	1	-1	-1	-1	-1
29	128	1	2006	ES	-1	1	1	2	1	1	-1	1	1	1	1	1	1	1	3	1	2	1	1	1	1	-1	-1	-1	1
30	129	1	2006	ES	-1	1	1	2	1	1	-1	1	1	1	3	3	1	1	3	1	2	1	1	1	1	-1	-1	-1	-1
31	130	1	2006	ES	-1	1	1	1	1	1	-1	1	1	1	2	2	1	1	3	1	1	1	1	1	1	-1	-1	-1	-1
32	131	1	2006	ES	-1	1	1	1	1	1	-1	1	1	1	1	1	1	1	3	1	2	3	1	1	1	-1	-1	-1	-1
33	132	1	2006	ES	-1	1	1	1	1	1	-1	1	1	1	1	1	1	1	3	3	2	1	1	1	1	-1	-1	-1	-1
34	133	1	2006	ES	-1	1	1	2	1	1	-1	1	1	1	1	1	1	1	3	1	2	1	1	1	1	-1	-1	-1	-1
35	134	1	2006	ES	-1	1	1	2	1	1	-1	1	1	1	1	1	1	1	3	1	1	1	1	1	1	-1	-1	-1	-1
36	135	1	2006	ES	-1	1	1	2	1	1	-1	1	1	1	2	2	1	1	3	1	2	3	1	3	1	-1	-1	-1	-1
37	136	1	2006	ES	-1	1	1	1	1	1	-1	1	1	1	1	1	1	1	3	3	2	3	1	3	1	-1	-1	-1	-1
38	137	1	2006	ES	-1	1	1	1	1	1	-1	1	1	1	3	3	3	1	1	3	1	1	1	1	1	-1	-1	-1	-1
39	138	1	2006	ES	-1	1	1	2	1	1	-1	1	1	3	3	3	1	1	3	3	2	3	1	1	1	-1	-1	-1	-1
40	139	1	2006	ES	-1	1	1	2	1	1	-1	1	1	1	1	1	1	1	3	2	2	1	1	1	1	-1	-1	-1	-1
41	140	1	2006	ES	-1	1	1	2	1	1	-1	1	1	1	3	3	1	1	3	1	2	3	3	1	1	-1	-1	-1	-1
42	141	1	2006	ES	-1	1	1	2	1	1	-1	1	1	1	3	1	1	1	3	3	2	1	3	1	1	-1	-1	-1	-1
43	142	1	2006	ES	-1	1	1	2	1	1	-1	1	1	1	2	1	1	2	3	3	2	1	3	1	1	-1	-1	-1	-1
44	143	1	2006	ES	-1	1	1	2	1	1	-1	1	1	1	1	1	1	1	1	1	1	1	1	1	1	-1	-1	-1	-1
45	144	1	2006	ES	-1	1	1	1	1	1	-1	1	1	1	1	1	1	1	3	1	2	1	1	1	1	-1	-1	-1	-1
46	145	1	2006	ES	-1	1	1	1	1	1	-1	1	1	3	1	1	1	1	3	1	2	3	1	1	1	-1	-1	-1	-1
47	146	1	2006	ES	-1	1	1	1	1	1	-1	1	1	1	1	1	1	1	3	1	2	1	1	1	1	-1	-1	-1	-1
48	147	1	2006	ES	-1	1	1	1	1	1	-1	1	1	1	1	1	1	1	3	1	1	1	1	1	1	-1	-1	-1	-1
49	148	1	2006	ES	-1	1	1	2	1	1	-1	1	1	3	1	1	3	1	3	3	2	3	1	1	1	-1	-1	-1	-1
50	149	1	2006	ES	-1	1	1	2	1	1	-1	1	1	1	1	1	1	1	3	1	2	3	1	1	1	-1	-1	-1	-1
51	150	1	2006	ES	-1	1	1	1	1	1	-1	1	1	1	1	1	1	1	3	1	1	1	1	1	1	-1	-1	-1	-1
52	151	1	2006	ES	-1	1	1	1	1	1	-1	1	1	3	2	2	1	1	3	3	2	1	3	3	1	-1	-1	-1	-1
53	152	1	2006	ES	-1	1	1	1	1	1	-1	1	1	3	1	1	1	1	3	1	1	1	1	1	1	-1	-1	-1	-1
54	153	1	2006	ES	-1	1	1	1	1	1	-1	1	1	3	2	2	1	1	3	3	2	1	1	1	1	-1	-1	-1	-1
55	154	1	2006	ES	-1	1	1	2	1	1	-1	1	1	3	1	1	1	1	3	3	2	3	3	1	1	-1	-1	-1	-1
56	155	1	2006	ES	-1	1	1	1	1	1	-1	1	1	1	1	1	1	1	3	1	2	1	1	1	1	-1	-1	-1	-1
57	156	1	2006	ES	-1	1	1	1	1	1	-1	1	1	1	1	1	1	1	3	3	2	1	1	1	1	-1	-1	-1	-1
58	157	1	2006	ES	-1	1	1	2	1	1	-1	1	1	1	1	1	1	1	3	1	2	1	1	1	1	-1	-1	-1	-1
59	158	1	2006	ES	-1	1	1	1	1	1	-1	1	1	1	2	2	1	1	3	1	3	1	1	1	1	-1	-1	-1	-1
60	159	1	2006	ES	-1	3	1	1	1	1	-1	1	1	3	2	2	1	1	3	1	2	1	1	3	1	-1	-1	-1	-1
61	160	1	2006	ES	-1	1	1	1	1	1	-1	1	1	1	1	1	1	1	3	1	2	1	3	1	1	-1	-1	-1	-1
62	161	1	2006	ES	-1	1	1	1	1	1	-1	1	1	1	1	1	1	1	3	1	1	3	1	1	1	-1	-1	-1	-1
63	162	1	2006	ES	-1	1	1	1	1	1	-1	1	1	1	1	1	1	1	3	1	1	1	3	1	1	-1	-1	-1	-1
64	163	1	2006	ES	-1	1	1	1	1	1	-1	1	1	1	1	1	1	1	1	1	2	1	3	1	1	-1	-1	-1	-1
65	164	1	2006	ES	-1	1	1	2	1	1	-1	1	1	1	1	1	1	1	3	1	2	1	3	1	1	-1	-1	-1	1
66	165	1	2006	ES	-1	1	1	2	-1	-1	-1	1	1	1	1	1	1	1	3	1	2	1	1	3	1	-1	-1	-1	-1
67	166	1	2006	ES	-1	1	1	1	1	1	-1	1	1	3	1	1	1	1	3	1	2	1	1	3	1	-1	-1	-1	-1
68	167	1	2006	ES	-1	1	1	1	1	1	-1	1	1	3	2	2	1	1	1	1	1	1	1	1	1	-1	-1	-1	-1
69	168	1	2006	ES	-1	2	1	2	1	1	-1	1	1	2	2	2	1	1	3	1	2	3	3	1	1	-1	-1	-1	-1
70	169	1	2006	ES	-1	1	1	1	1	1	-1	1	1	1	3	3	1	1	3	2	2	3	3	3	1	-1	-1	-1	-1
71	170	1	2006	ES	-1	1	1	2	1	1	-1	1	1	1	1	1	1	1	3	3	2	1	1	1	1	-1	-1	-1	-1
72	171	1	2006	ES	-1	1	1	2	1	1	-1	1	1	1	2	1	1	2	3	3	2	1	1	3	1	-1	-1	-1	-1
73	172	1	2006	ES	-1	1	1	1	1	1	-1	1	1	1	1	1	1	1	3	3	1	3	1	3	1	-1	-1	-1	-1
74	173	1	2006	ES	-1	1	1	2	1	1	-1	1	1	1	1	1	1	1	3	1	2	1	1	1	1	-1	-1	-1	-1
75	174	1	2006	ES	-1	1	1	2	1	1	-1	1	1	3	2	2	1	1	3	3	2	1	3	3	1	-1	-1	-1	-1
76	175	1	2006	ES	-1	1	1	2	1	1	-1	1	1	1	1	1	1	1	3	1	1	1	1	3	1	-1	-1	-1	-1
77	176	1	2006	ES	-1	1	1	1	1	1	-1	1	1	3	1	1	1	1	3	1	2	1	1	1	1	-1	-1	-1	-1
78	177	1	2006	ES	-1	1	1	1	1	1	-1	1	1	1	1	1	1	2	1	1	2	1	3	1	1	-1	-1	-1	-1
79	178	1	2006	ES	-1	1	1	2	1	1	-1	1	1	3	1	1	1	1	3	3	2	3	1	1	1	-1	-1	-1	-1
80	179	1	2006	ES	-1	1	1	2	1	1	-1	1	1	3	1	1	1	1	1	1	2	1	3	3	1	-1	-1	-1	1
81	180	1	2006	ES	-1	1	1	2	1	1	-1	1	1	3	1	1	1	1	3	3	2	3	1	3	1	-1	-1	-1	1
82	181	1	2006	ES	-1	1	1	1	1	1	-1	1	1	3	1	1	1	1	3	3	1	1	1	1	1	-1	-1	-1	-1
83	182	1	2006	ES	-1	1	1	1	1	1	-1	1	1	1	1	1	1	1	1	1	1	1	1	1	1	-1	-1	-1	-1
84	183	1	2006	ES	-1	1	1	2	1	1	-1	1	1	1	1	1	1	1	3	1	2	1	1	1	1	-1	-1	-1	-1
85	184	1	2006	ES	-1	1	1	2	1	1	-1	1	1	1	1	1	1	1	3	3	2	3	1	1	1	-1	-1	-1	-1
86	185	1	2006	ES	-1	1	1	1	1	1	-1	1	1	1	1	1	1	1	3	3	2	3	3	1	1	-1	-1	-1	-1
87	186	1	2006	ES	-1	1	1	1	1	1	-1	1	1	1	1	1	1	1	3	1	2	3	1	1	1	-1	-1	-1	-1
88	187	1	2006	ES	-1	1	1	1	1	1	-1	1	1	1	1	1	1	1	3	1	2	1	1	1	1	-1	-1	-1	-1
89	188	1	2006	ES	-1	1	1	1	1	1	-1	1	1	1	1	1	1	1	3	1	2	1	1	1	1	-1	-1	-1	-1
90	189	1	2006	ES	-1	1	1	1	1	1	-1	1	1	1	2	1	1	1	3	2	2	1	1	1	1	-1	-1	-1	-1
91	190	1	2006	ES	-1	1	1	1	1	1	-1	1	1	1	1	1	1	1	3	1	2	1	1	1	1	-1	-1	-1	-1
92	191	1	2006	ES	-1	2	1	2	1	1	-1	1	1	2	2	2	1	1	3	1	2	3	3	1	1	-1	-1	-1	-1
93	192	1	2006	ES	-1	2	1	2	1	1	-1	1	1	2	2	2	1	1	3	2	2	3	3	1	1	-1	-1	-1	-1
94	193	1	2006	ES	-1	1	1	1	1	1	-1	1	1	1	2	2	1	1	3	1	2	3	3	1	1	-1	-1	-1	-1
95	194	1	2006	ES	-1	1	1	1	1	1	-1	1	1	1	1	1	1	1	3	1	2	1	3	1	1	-1	-1	-1	-1
96	195	1	2006	ES	-1	1	1	1	1	1	-1	1	1	1	1	1	1	2	3	1	2	1	3	1	1	-1	-1	-1	-1
97	196	1	2006	ES	-1	1	1	1	1	1	-1	1	1	1	1	1	1	1	3	3	2	1	1	1	1	-1	-1	-1	-1
98	197	1	2006	ES	-1	1	1	2	1	1	-1	1	1	1	2	2	1	1	3	1	1	3	1	1	1	-1	-1	-1	-1
99	198	1	2006	ES	-1	1	1	1	1	1	-1	1	1	1	1	1	1	1	3	3	2	1	1	1	1	-1	-1	-1	-1
100	199	1	2006	ES	-1	1	1	1	1	1	-1	1	1	1	1	1	1	1	3	3	1	1	1	1	1	-1	-1	-1	-1
101	2001	1	2006	FR	-1	1	1	1	1	-1	-1	1	1	3	1	1	1	1	3	3	2	-1	1	1	1	-1	-1	-1	-1
102	2002	1	2006	FR	-1	1	1	1	1	-1	-1	1	1	3	1	1	1	1	1	1	2	-1	2	1	1	-1	-1	-1	-1
103	2003	1	2006	FR	-1	1	1	1	1	-1	-1	1	1	1	1	1	1	1	2	1	3	-1	1	1	1	-1	-1	-1	-1
104	2004	1	2006	FR	-1	1	1	1	1	-1	-1	1	1	1	1	1	1	1	3	1	2	-1	1	1	1	-1	-1	-1	-1
105	2005	1	2006	FR	-1	1	1	1	1	-1	-1	1	1	1	1	1	1	1	1	1	2	-1	3	1	1	-1	-1	-1	1
106	2006	1	2006	FR	-1	1	1	1	1	-1	-1	1	1	1	3	3	1	1	3	1	3	-1	1	1	1	-1	-1	-1	-1
107	2007	1	2006	FR	-1	1	1	2	1	-1	-1	1	1	3	1	1	1	2	3	1	2	-1	3	1	1	-1	-1	-1	-1
108	2008	1	2006	FR	-1	1	1	2	1	-1	-1	1	1	1	1	1	1	1	1	1	2	-1	3	1	1	-1	-1	-1	-1
109	2009	1	2006	FR	-1	3	1	2	1	-1	-1	1	1	1	3	3	1	2	3	3	2	-1	3	1	1	-1	-1	-1	-1
110	2010	1	2006	FR	-1	1	1	1	1	-1	-1	1	1	3	1	1	1	1	3	3	2	-1	3	1	1	-1	-1	-1	1
111	2011	1	2006	FR	-1	1	1	2	1	-1	-1	1	1	1	1	1	1	1	3	1	2	-1	1	1	1	-1	-1	-1	-1
112	2012	1	2006	FR	-1	1	1	1	1	-1	-1	1	1	1	1	3	1	2	3	3	2	-1	1	1	1	-1	-1	-1	-1
113	2013	1	2006	FR	-1	1	1	2	2	-1	-1	1	1	3	1	1	1	1	3	1	1	-1	1	1	1	-1	-1	-1	-1
114	2014	1	2006	FR	-1	1	1	2	1	-1	-1	1	1	3	1	1	1	1	3	1	2	-1	3	1	1	-1	-1	-1	-1
115	2015	1	2006	FR	-1	1	1	2	1	-1	-1	1	1	3	1	1	1	1	3	1	2	-1	1	3	1	-1	-1	-1	1
116	2016	1	2006	FR	-1	1	1	1	1	-1	-1	1	1	1	1	1	1	1	3	1	2	-1	1	1	1	-1	-1	-1	1
117	2017	1	2006	FR	-1	3	1	1	1	-1	-1	1	2	3	1	1	1	1	3	1	2	-1	3	1	1	-1	-1	-1	-1
118	2018	1	2006	FR	-1	1	1	2	1	-1	-1	2	1	3	1	1	1	1	3	1	2	-1	1	1	1	-1	-1	-1	-1
119	2019	1	2006	FR	-1	1	1	2	1	-1	-1	1	1	3	1	1	1	1	1	3	1	-1	1	1	1	-1	-1	-1	-1
120	2020	1	2006	FR	-1	1	1	2	1	-1	-1	1	1	3	1	1	1	2	3	1	2	-1	3	1	1	-1	-1	-1	-1
121	2021	1	2006	FR	-1	1	1	2	1	-1	-1	1	1	1	3	2	1	1	3	3	2	-1	3	1	1	-1	-1	-1	-1
122	2022	1	2006	FR	-1	1	1	1	1	-1	-1	1	1	3	1	1	1	1	1	3	2	-1	3	1	1	-1	-1	-1	1
123	2023	1	2006	FR	-1	3	1	2	1	-1	-1	1	1	3	1	1	1	1	3	1	2	-1	1	1	1	-1	-1	-1	-1
124	2024	1	2006	FR	-1	1	1	2	1	-1	-1	1	1	1	1	1	1	1	3	1	1	-1	1	1	1	-1	-1	-1	-1
125	2025	1	2006	FR	-1	1	1	1	1	-1	-1	1	1	3	1	1	1	1	1	1	2	-1	1	1	1	-1	-1	-1	-1
126	2026	1	2006	FR	-1	1	1	1	1	-1	-1	1	1	2	1	1	1	1	3	1	2	-1	3	1	1	-1	-1	-1	-1
127	2027	1	2006	FR	-1	1	1	2	1	-1	-1	1	1	1	1	1	1	1	3	3	3	-1	1	1	1	-1	-1	-1	-1
128	2028	1	2006	FR	-1	3	1	1	1	-1	-1	1	1	3	3	2	1	1	3	1	1	-1	1	1	1	-1	-1	-1	-1
129	228	1	2006	GE	-1	1	1	-1	1	-1	-1	1	-1	1	1	1	1	1	1	1	1	-1	3	1	1	-1	-1	-1	-1
130	229	1	2006	GE	-1	1	1	1	1	1	-1	1	-1	1	1	1	1	1	1	1	1	-1	1	1	1	-1	-1	-1	3
131	230	1	2006	GE	-1	1	1	-1	1	-1	-1	1	-1	3	1	1	1	1	1	1	1	-1	1	1	1	-1	-1	-1	-1
132	231	1	2006	GE	-1	1	1	2	1	-1	-1	1	-1	1	1	1	1	1	1	1	2	-1	3	1	1	-1	-1	-1	-1
133	232	1	2006	GE	-1	1	1	1	1	1	-1	1	-1	1	1	1	1	1	1	1	2	-1	1	1	3	-1	-1	-1	-1
134	233	1	2006	GE	-1	1	1	-1	1	-1	-1	1	-1	1	1	1	1	1	1	1	1	-1	1	1	1	-1	-1	-1	-1
135	234	1	2006	GE	-1	1	1	-1	1	-1	-1	1	-1	1	1	1	1	1	1	1	1	-1	1	1	1	-1	-1	-1	1
136	235	1	2006	GE	-1	1	1	-1	1	-1	-1	1	-1	1	1	1	1	1	1	1	1	-1	1	1	1	-1	-1	-1	-1
137	236	1	2006	GE	-1	1	1	-1	1	-1	-1	1	-1	1	1	1	1	1	1	1	1	-1	1	1	1	-1	-1	-1	-1
138	237	1	2006	GE	-1	1	1	2	1	-1	-1	1	-1	1	1	1	1	3	1	3	1	-1	3	2	1	-1	-1	-1	-1
139	238	1	2006	GE	-1	1	1	2	1	-1	-1	1	-1	1	1	1	1	1	3	1	2	-1	3	1	1	-1	-1	-1	1
140	239	1	2006	GE	-1	1	1	-1	1	-1	-1	1	-1	1	1	1	1	3	1	1	1	-1	3	1	1	-1	-1	-1	-1
141	240	1	2006	GE	-1	1	1	-1	1	-1	-1	1	-1	1	1	1	1	1	1	1	1	-1	1	1	1	-1	-1	-1	-1
142	241	1	2006	GE	-1	1	1	-1	1	-1	-1	1	-1	1	1	1	3	3	1	3	2	-1	3	1	1	-1	-1	-1	-1
143	242	1	2006	GE	-1	1	1	-1	1	-1	-1	1	-1	3	1	1	1	1	1	1	1	-1	1	1	1	-1	-1	-1	-1
144	243	1	2006	GE	-1	1	1	-1	1	-1	-1	1	-1	3	1	1	1	1	1	1	1	-1	1	1	1	-1	-1	-1	-1
145	244	1	2006	GE	-1	1	1	-1	1	-1	-1	1	-1	1	1	1	1	1	1	1	1	-1	1	1	1	-1	-1	-1	-1
146	245	1	2006	GE	-1	1	1	-1	1	-1	-1	1	-1	1	1	1	1	1	1	1	1	-1	1	1	1	-1	-1	-1	-1
147	246	1	2006	GE	-1	1	1	-1	1	-1	-1	1	-1	1	1	1	1	1	3	3	1	-1	1	1	1	-1	-1	-1	1
148	247	1	2006	GE	-1	1	1	-1	1	-1	-1	1	-1	1	1	1	1	1	1	3	1	-1	1	1	1	-1	-1	-1	1
149	248	1	2006	GE	-1	1	1	-1	1	-1	-1	1	-1	1	1	1	1	1	3	1	1	-1	1	1	1	-1	-1	-1	1
150	249	1	2006	GE	-1	1	1	-1	1	-1	-1	1	-1	1	1	1	1	2	1	1	2	-1	1	1	1	-1	-1	-1	-1
151	250	1	2006	GE	-1	1	1	-1	1	-1	-1	1	1	1	1	1	1	1	3	1	1	-1	3	1	1	-1	-1	-1	1
152	251	1	2006	GE	-1	1	1	-1	1	-1	-1	1	2	3	1	1	1	1	3	1	1	-1	3	1	1	-1	-1	-1	1
153	252	1	2006	GE	-1	-1	-1	-1	-1	-1	-1	-1	-1	-1	-1	-1	-1	-1	-1	-1	-1	-1	1	1	-1	-1	-1	-1	-1
154	253	1	2006	GE	-1	3	1	-1	1	-1	-1	1	-1	3	1	1	1	1	3	1	2	-1	1	1	1	-1	-1	-1	1
155	254	1	2006	GE	-1	1	1	-1	1	-1	-1	1	-1	3	1	1	1	1	3	3	2	-1	3	1	1	-1	-1	-1	1
156	255	1	2006	GE	-1	1	1	1	1	1	-1	1	-1	1	1	1	1	1	1	1	1	-1	1	1	1	-1	-1	-1	-1
157	256	1	2006	PT	-1	1	1	2	1	1	-1	1	1	1	1	1	1	1	1	1	1	1	1	1	1	-1	-1	-1	1
158	257	1	2006	PT	-1	1	1	2	1	1	-1	1	1	1	1	1	1	1	1	1	1	1	1	1	1	-1	-1	-1	-1
159	258	1	2006	PT	-1	1	1	1	1	1	-1	1	1	1	1	1	1	1	1	1	1	1	1	1	1	-1	-1	-1	1
160	259	1	2006	PT	-1	1	1	2	1	1	-1	1	1	1	1	1	1	1	1	1	1	1	1	1	1	-1	-1	-1	1
161	260	1	2006	PT	-1	1	1	1	1	1	-1	1	1	1	1	1	1	1	1	1	1	1	1	1	1	-1	-1	-1	-1
162	261	1	2006	PT	-1	1	1	1	1	1	-1	1	1	1	1	1	1	1	1	1	1	1	1	1	1	-1	-1	-1	-1
163	2029	1	2006	FR	-1	1	1	-1	1	-1	-1	1	1	3	1	1	1	-1	1	3	2	-1	1	1	1	-1	-1	-1	-1
164	2030	1	2006	FR	-1	1	1	-1	1	-1	-1	1	1	1	1	1	1	1	1	3	2	-1	1	1	1	-1	-1	-1	-1
165	2031	1	2006	FR	-1	1	1	-1	1	-1	-1	1	1	1	1	1	1	1	1	3	2	-1	1	1	1	-1	-1	-1	1
166	2032	1	2006	FR	-1	1	1	-1	1	1	-1	1	1	1	1	1	1	1	1	1	2	-1	1	1	1	-1	-1	-1	1
167	2033	1	2006	FR	-1	1	1	1	1	-1	-1	1	1	1	1	1	1	1	1	3	2	-1	1	1	1	-1	-1	-1	1
168	2034	1	2006	FR	-1	1	1	1	1	-1	-1	1	1	1	1	1	1	1	1	3	2	-1	1	1	1	-1	-1	-1	1
169	2035	1	2006	FR	-1	1	1	1	1	1	-1	1	1	1	1	1	1	1	1	1	2	-1	3	1	1	-1	-1	-1	-1
170	2036	1	2006	FR	-1	1	1	1	-1	-1	-1	1	1	1	1	1	1	1	1	1	2	-1	1	1	1	-1	-1	-1	-1
171	2037	1	2006	FR	-1	1	1	2	1	-1	-1	1	1	3	1	1	1	1	3	1	2	-1	3	1	1	-1	-1	-1	1
172	2038	1	2006	FR	-1	1	1	1	1	1	-1	1	1	1	1	1	1	1	3	1	1	-1	1	1	1	-1	-1	-1	1
173	2039	1	2006	FR	-1	1	1	1	1	-1	-1	1	1	1	1	1	1	1	3	1	2	-1	1	1	1	-1	-1	-1	-1
174	2040	1	2006	FR	-1	1	1	1	1	-1	-1	1	1	1	1	1	1	1	3	1	2	-1	1	1	1	-1	-1	-1	-1
175	2041	1	2006	FR	-1	1	1	1	1	-1	-1	1	1	1	2	2	2	-1	3	2	2	-1	1	1	1	-1	-1	-1	-1
176	2042	1	2006	FR	-1	1	1	1	1	-1	-1	1	1	1	3	3	1	1	1	3	2	-1	1	1	1	-1	-1	-1	-1
177	2043	1	2006	FR	-1	1	1	1	1	-1	-1	1	1	1	1	1	1	1	1	1	1	-1	1	1	1	-1	-1	-1	3
178	2044	1	2006	FR	-1	1	1	1	1	1	-1	1	1	1	1	1	1	1	1	1	2	-1	1	1	1	-1	-1	-1	-1
179	2045	1	2006	FR	-1	1	1	1	1	-1	-1	1	1	1	1	1	1	1	1	1	2	-1	3	1	1	-1	-1	-1	-1
180	2046	1	2006	FR	-1	1	1	1	1	1	-1	1	1	1	1	1	1	1	3	1	2	-1	1	1	1	-1	-1	-1	-1
181	2047	1	2006	FR	-1	1	1	1	1	1	-1	1	1	1	1	1	1	1	3	1	2	-1	3	1	1	-1	-1	-1	-1
182	2048	1	2006	FR	-1	3	1	-1	1	-1	-1	1	1	3	1	1	1	1	-1	1	2	-1	1	1	1	-1	-1	-1	-1
183	2049	1	2006	FR	-1	1	1	1	1	-1	-1	1	1	1	1	1	1	1	1	3	2	-1	3	1	1	-1	-1	-1	-1
184	2050	1	2006	FR	-1	1	1	2	1	-1	-1	1	1	1	1	1	1	1	3	3	2	-1	3	3	1	-1	-1	-1	-1
185	2051	1	2006	FR	-1	1	1	1	1	-1	-1	1	1	1	1	3	1	-1	1	1	2	-1	1	1	1	-1	-1	-1	-1
186	2052	1	2006	FR	-1	1	1	-1	-1	-1	-1	-1	-1	-1	-1	-1	-1	-1	-1	-1	-1	-1	3	1	1	-1	-1	-1	-1
187	2053	1	2006	FR	-1	1	1	1	1	-1	-1	1	1	1	1	1	1	-1	1	3	2	-1	3	3	1	-1	-1	-1	-1
188	2054	1	2006	FR	-1	1	1	1	1	-1	-1	1	1	1	1	1	1	1	1	1	-1	-1	3	1	1	-1	-1	-1	-1
189	2055	1	2006	FR	-1	1	1	1	1	-1	-1	1	1	1	1	1	1	1	3	3	2	-1	3	3	1	-1	-1	-1	-1
190	2056	1	2006	FR	-1	1	1	1	1	-1	-1	1	1	3	1	1	1	1	-1	3	2	-1	3	3	1	-1	-1	-1	-1
191	2057	1	2006	FR	-1	1	1	1	1	-1	-1	1	1	2	1	1	1	-1	1	1	2	-1	3	1	1	-1	-1	-1	1
192	2058	1	2006	FR	-1	1	1	1	1	1	-1	1	1	1	1	1	1	1	3	3	2	-1	1	1	1	-1	-1	-1	-1
193	2059	1	2006	CZ	-1	1	1	-1	1	-1	-1	1	1	1	1	1	1	1	1	1	1	-1	3	1	1	-1	-1	-1	-1
194	2060	1	2006	CZ	-1	1	1	1	1	1	-1	1	1	1	1	1	1	1	1	1	2	-1	1	1	1	-1	-1	-1	-1
195	2061	1	2006	CZ	-1	1	1	2	1	-1	-1	1	1	1	1	1	1	1	1	1	2	3	3	1	1	-1	-1	-1	3
196	2062	1	2006	CZ	-1	1	1	2	1	1	-1	1	1	3	1	1	1	1	1	3	2	1	1	1	1	-1	-1	-1	1
197	2063	1	2006	CZ	-1	1	1	-1	1	-1	-1	1	-1	2	1	1	1	1	1	1	3	-1	3	1	1	-1	-1	-1	-1
198	2064	1	2006	CZ	-1	1	1	2	1	-1	-1	1	-1	3	1	1	1	3	1	3	1	-1	3	1	1	-1	-1	-1	-1
199	2065	1	2006	GE	-1	1	1	1	1	1	-1	1	-1	-1	1	1	1	2	3	3	2	1	3	1	1	-1	-1	-1	1
200	2066	1	2006	GE	-1	1	1	1	1	1	-1	1	-1	1	1	1	1	2	3	1	2	-1	3	3	1	-1	-1	-1	1
201	2067	1	2006	GE	-1	1	1	1	1	1	-1	1	-1	1	1	1	1	1	3	-1	2	-1	1	1	1	-1	-1	-1	1
202	2068	1	2006	GE	-1	1	1	-1	1	-1	-1	1	-1	1	1	1	1	1	1	1	2	-1	1	1	1	-1	-1	-1	1
203	2069	1	2006	GE	-1	1	1	-1	1	-1	-1	1	-1	3	1	-1	1	1	3	3	-1	-1	1	1	1	-1	-1	-1	-1
204	2070	1	2006	GE	-1	1	1	-1	1	-1	-1	1	-1	3	1	-1	1	1	3	3	1	-1	1	1	1	-1	-1	-1	-1
205	2071	1	2006	GE	-1	1	1	-1	1	-1	-1	1	-1	3	1	3	1	2	3	1	2	-1	3	1	1	-1	-1	-1	1
206	2072	1	2006	GE	-1	1	1	-1	1	-1	-1	1	-1	1	1	1	1	1	3	1	2	1	1	1	1	-1	-1	-1	-1
207	2073	1	2006	GE	-1	1	1	-1	1	-1	-1	1	1	3	1	1	1	1	3	3	2	-1	1	1	1	-1	-1	-1	1
208	2074	1	2006	PT	-1	1	1	2	1	1	-1	1	1	1	1	1	1	1	2	1	2	3	3	3	1	-1	-1	-1	-1
209	2075	1	2006	PT	-1	3	1	2	1	1	-1	1	1	3	1	1	1	1	2	1	1	-1	3	3	1	-1	-1	-1	-1
210	2076	1	2006	PT	-1	3	1	2	1	1	-1	1	1	3	1	1	1	1	1	3	-1	3	3	3	1	-1	-1	-1	-1
211	2077	1	2006	PT	-1	1	1	2	1	1	-1	1	1	1	1	1	1	1	1	1	1	-1	3	3	1	-1	-1	-1	-1
212	2078	1	2006	PT	-1	1	1	2	1	1	-1	1	1	1	1	1	1	1	2	1	2	3	3	3	-1	-1	-1	-1	-1
213	2079	1	2006	PT	-1	1	1	2	1	-1	-1	1	1	1	1	1	1	1	1	1	2	-1	1	1	1	-1	-1	-1	-1
214	2080	1	2006	PT	-1	1	1	2	1	-1	-1	1	1	1	2	1	1	1	1	1	2	-1	3	1	1	-1	-1	-1	-1
215	2081	1	2006	PT	-1	1	1	2	1	1	-1	1	1	1	1	1	1	2	1	1	2	-1	3	3	-1	-1	-1	-1	-1
216	2082	1	2006	PT	-1	1	1	-1	-1	-1	-1	-1	1	1	1	1	1	1	1	1	1	-1	3	3	-1	-1	-1	-1	-1
217	2083	1	2006	PT	-1	3	1	2	1	1	-1	1	1	1	1	1	1	1	1	3	-1	3	3	3	-1	-1	-1	-1	-1
218	316	1	2006	SK	-1	1	1	1	1	-1	-1	1	-1	1	1	1	1	1	1	1	2	-1	1	1	1	-1	-1	-1	-1
219	317	1	2006	SK	-1	1	1	-1	1	-1	-1	1	-1	1	1	1	1	1	1	1	2	-1	1	1	1	-1	-1	-1	-1
220	318	1	2006	SK	-1	1	1	-1	1	-1	-1	1	-1	1	1	1	1	1	3	1	1	-1	3	1	1	-1	-1	-1	-1
221	319	1	2006	CZ	-1	1	1	1	1	1	-1	1	-1	3	1	1	1	1	3	3	2	-1	1	1	1	-1	-1	-1	1
222	320	1	2006	CZ	-1	1	1	1	1	1	-1	1	1	1	1	1	1	1	3	1	2	-1	1	1	1	-1	-1	-1	1
223	321	1	2006	CZ	-1	1	1	1	1	1	-1	1	1	1	1	1	1	1	1	3	2	-1	3	1	1	-1	-1	-1	1
224	322	1	2006	CZ	-1	1	1	1	1	1	-1	1	-1	3	1	1	1	1	1	1	2	-1	3	1	1	-1	-1	-1	1
225	323	1	2006	CZ	-1	3	1	-1	1	-1	-1	1	-1	3	1	2	1	2	1	3	1	-1	3	1	1	-1	-1	-1	-1
226	324	1	2006	CZ	-1	1	1	2	1	-1	-1	1	-1	3	1	1	1	1	1	3	2	-1	3	1	1	-1	-1	-1	3
227	325	1	2006	CZ	-1	1	1	2	1	-1	-1	1	-1	3	1	1	1	1	1	1	2	-1	3	1	1	-1	-1	-1	3
228	326	1	2006	CZ	-1	1	1	2	1	-1	-1	1	-1	1	1	1	1	1	1	1	1	-1	1	1	1	-1	-1	-1	1
229	327	1	2006	CZ	-1	1	1	2	1	-1	-1	1	-1	1	1	1	1	1	1	1	1	-1	1	1	1	-1	-1	-1	1
230	328	1	2006	CZ	-1	1	1	-1	1	-1	-1	1	-1	1	1	1	1	1	1	1	1	-1	1	1	1	-1	-1	-1	1
231	329	1	2006	CZ	-1	1	1	-1	1	-1	-1	1	-1	1	1	1	1	1	1	1	1	-1	2	1	1	-1	-1	-1	1
232	330	1	2006	CZ	-1	2	1	2	1	-1	-1	1	-1	3	1	1	1	1	3	3	2	-1	3	1	1	-1	-1	-1	-1
233	331	1	2006	CZ	-1	1	1	2	1	-1	-1	1	-1	1	1	1	1	1	3	1	2	-1	3	1	1	-1	-1	-1	3
234	332	1	2006	CZ	-1	1	1	2	1	-1	-1	1	-1	3	1	1	1	1	3	3	2	-1	3	1	1	-1	-1	-1	-1
235	333	1	2006	CZ	-1	1	1	-1	1	-1	-1	1	-1	1	1	1	1	1	1	1	1	-1	3	1	1	-1	-1	-1	1
236	334	1	2006	CZ	-1	1	1	-1	1	-1	-1	1	-1	1	1	1	1	1	1	1	1	-1	3	1	1	-1	-1	-1	1
237	335	1	2006	CZ	-1	1	1	2	1	-1	-1	1	-1	1	1	1	1	1	1	1	2	-1	3	1	1	-1	-1	-1	3
238	336	1	2006	CZ	-1	1	1	2	1	-1	-1	1	-1	1	1	1	1	1	1	3	1	-1	1	1	1	-1	-1	-1	1
239	337	1	2006	CZ	-1	1	1	2	1	-1	-1	1	-1	3	1	1	1	1	1	3	2	-1	3	1	1	-1	-1	-1	3
240	338	1	2006	CZ	-1	1	1	-1	1	-1	-1	1	-1	1	1	1	1	1	3	3	2	-1	3	1	1	-1	-1	-1	-1
241	339	1	2006	CZ	-1	1	1	-1	1	-1	-1	1	-1	1	1	1	1	1	1	3	1	-1	1	1	1	-1	-1	-1	3
242	340	1	2006	CZ	-1	1	1	-1	1	-1	-1	1	-1	1	1	1	1	1	3	3	2	-1	3	1	1	-1	-1	-1	3
243	341	1	2006	CZ	-1	1	1	2	1	-1	-1	1	-1	1	1	1	1	1	1	1	2	-1	1	1	1	-1	-1	-1	-1
244	342	1	2006	CZ	-1	1	1	-1	1	-1	-1	1	-1	1	1	1	1	1	1	3	2	-1	3	1	1	-1	-1	-1	-1
245	343	1	2006	CZ	-1	1	1	2	1	-1	-1	1	-1	1	1	1	1	1	1	1	1	-1	1	1	1	-1	-1	-1	-1
246	344	1	2006	CZ	-1	1	1	-1	1	-1	-1	1	-1	1	1	1	1	1	1	1	2	-1	3	1	1	-1	-1	-1	-1
247	345	1	2006	CZ	-1	1	1	2	1	-1	-1	1	-1	3	1	1	1	1	3	3	2	-1	3	1	1	-1	-1	-1	3
248	346	1	2006	CZ	-1	1	1	-1	1	-1	-1	1	-1	1	1	1	1	1	1	1	2	-1	1	1	1	-1	-1	-1	3
249	347	1	2006	CZ	-1	1	1	2	-1	-1	-1	1	1	1	1	1	1	1	1	1	2	-1	3	1	1	-1	-1	-1	3
250	348	1	2006	CZ	-1	1	1	-1	1	-1	-1	1	-1	1	1	1	1	1	1	1	2	-1	3	1	1	-1	-1	-1	-1
251	349	1	2006	CZ	-1	3	1	-1	1	-1	-1	1	-1	1	1	1	1	1	1	3	2	-1	3	1	1	-1	-1	-1	-1
252	350	1	2006	CZ	-1	1	1	2	1	-1	-1	1	-1	1	1	1	1	1	3	3	2	1	3	3	1	-1	-1	-1	3
253	250	2	2007	GE	-1	1	1	1	1	1	-1	1	1	3	1	1	1	2	3	3	1	1	3	3	1	-1	-1	-1	1
254	501	1	2007	GE	-1	1	1	1	1	1	-1	1	1	1	1	1	1	1	1	1	1	1	1	1	1	-1	-1	-1	1
255	502	1	2007	GE	-1	1	1	1	1	1	-1	1	1	1	1	1	1	1	1	1	1	-1	1	1	1	-1	-1	-1	-1
256	503	1	2007	GE	-1	1	1	1	1	1	-1	1	1	1	1	1	1	1	1	1	1	-1	1	1	1	-1	-1	-1	-1
257	504	1	2007	GE	-1	1	1	1	1	1	-1	1	1	3	1	1	1	1	3	3	2	1	3	3	1	-1	-1	-1	1
258	235	2	2007	GE	-1	1	1	1	1	1	-1	1	1	1	1	1	1	1	3	3	2	-1	1	1	1	-1	-1	-1	3
259	234	2	2007	GE	-1	1	1	1	1	1	-1	1	1	2	1	1	1	1	3	2	3	1	1	1	1	-1	-1	-1	2
260	233	2	2007	GE	-1	3	1	1	1	1	-1	1	1	3	1	1	1	1	3	1	1	1	3	1	1	-1	-1	-1	-1
261	508	1	2007	GE	-1	1	1	1	1	1	-1	1	1	1	1	1	1	2	3	3	2	-1	3	1	1	-1	-1	-1	1
262	509	1	2007	GE	-1	1	1	1	1	1	-1	1	1	1	1	1	1	1	1	1	1	3	1	1	1	-1	-1	-1	-1
263	510	1	2007	GE	-1	1	1	1	1	1	-1	1	1	1	1	1	1	1	3	1	2	-1	3	1	3	-1	-1	-1	1
264	251	2	2007	GE	-1	1	1	1	1	-1	-1	1	1	3	1	1	1	1	3	1	2	-1	1	1	1	-1	-1	-1	1
265	512	1	2007	GE	-1	1	1	1	1	1	-1	1	1	3	1	1	2	1	3	1	2	1	3	1	1	-1	-1	-1	-1
266	513	1	2007	GE	-1	1	1	1	1	1	-1	1	1	3	1	1	1	1	3	3	2	1	3	1	1	-1	-1	-1	-1
267	247	2	2007	GE	-1	1	2	1	1	1	-1	1	1	1	1	1	1	1	1	1	2	1	1	1	1	-1	-1	-1	1
268	515	1	2007	GE	-1	1	1	1	1	1	-1	1	1	3	1	1	1	1	1	3	2	1	3	1	1	-1	-1	-1	1
269	242	2	2007	GE	-1	1	1	1	1	1	-1	1	1	3	1	1	1	1	3	1	2	1	3	1	1	-1	-1	-1	-1
270	517	1	2007	GE	-1	1	1	1	1	1	-1	1	1	1	1	1	1	1	1	1	1	1	1	1	1	-1	-1	-1	1
271	518	1	2007	GE	-1	1	1	1	1	1	-1	1	-1	3	1	1	1	1	3	3	2	1	1	1	1	-1	-1	-1	1
272	241	2	2007	GE	-1	1	1	1	1	1	-1	1	1	1	1	1	2	1	1	2	1	3	1	3	1	-1	-1	-1	-1
273	248	2	2007	GE	-1	1	1	1	1	1	-1	1	-1	1	1	1	1	1	3	3	1	1	3	3	1	-1	-1	-1	1
274	521	1	2007	GE	-1	1	1	1	1	1	-1	1	1	1	1	1	1	1	1	1	1	1	3	1	1	-1	-1	-1	1
275	240	2	2007	GE	-1	1	1	1	1	1	-1	1	1	1	1	1	1	1	1	1	1	1	1	1	1	-1	-1	-1	1
276	231	2	2007	GE	-1	1	1	1	1	1	-1	1	1	1	2	3	1	3	3	1	2	1	1	1	1	-1	-1	-1	-1
277	238	2	2007	GE	-1	1	1	1	1	1	-1	1	-1	1	1	1	1	1	3	1	2	1	3	1	1	-1	-1	-1	1
278	525	1	2007	GE	-1	1	1	1	1	1	-1	1	1	1	1	1	1	1	3	3	2	1	1	1	1	-1	-1	-1	1
279	246	2	2007	GE	-1	2	1	1	1	1	-1	1	1	3	3	3	3	3	1	3	1	1	1	1	1	-1	-1	-1	-1
280	254	2	2007	GE	-1	1	1	1	1	1	-1	1	1	3	1	1	1	1	3	3	1	1	3	1	1	-1	-1	-1	1
281	528	1	2007	GE	-1	1	1	1	1	1	-1	1	1	2	1	1	1	3	1	3	2	-1	1	1	1	-1	-1	-1	1
282	529	1	2007	GE	-1	2	1	1	1	1	-1	1	1	1	1	1	1	1	1	3	1	-1	1	1	1	-1	-1	-1	-1
283	253	2	2007	GE	-1	3	1	1	1	1	-1	1	1	3	1	1	3	2	3	3	2	1	3	1	1	-1	-1	-1	1
284	531	1	2007	GE	-1	1	1	1	1	-1	-1	1	1	1	1	1	1	1	1	3	2	-1	3	1	1	-1	-1	-1	1
285	532	1	2007	ES	-1	1	1	1	1	1	-1	1	1	1	1	1	1	1	3	3	2	1	1	1	1	-1	-1	-1	-1
286	533	1	2007	ES	-1	1	1	1	1	1	-1	1	1	1	1	1	1	1	1	1	1	1	1	1	1	-1	-1	-1	-1
287	534	1	2007	ES	-1	1	1	1	1	1	-1	1	1	1	1	1	1	3	1	3	1	1	2	1	1	-1	-1	-1	1
288	535	1	2007	ES	-1	1	1	1	1	1	-1	1	1	1	1	1	2	1	1	2	3	1	1	1	1	-1	-1	-1	-1
289	536	1	2007	ES	-1	1	1	1	1	1	-1	1	1	1	1	1	1	2	3	3	1	1	3	1	3	-1	-1	-1	-1
290	537	1	2007	ES	-1	1	1	1	1	1	-1	1	1	1	1	1	1	3	1	3	1	1	1	3	1	-1	-1	-1	-1
291	198	2	2007	ES	-1	1	1	1	1	1	-1	1	1	1	1	1	1	1	1	1	1	1	1	1	1	-1	-1	-1	-1
292	199	2	2007	ES	-1	1	1	1	1	1	-1	1	1	1	1	1	1	1	3	3	2	1	1	1	1	-1	-1	-1	-1
293	540	1	2007	ES	-1	1	1	1	1	1	-1	1	1	1	1	1	1	1	1	1	1	1	1	1	1	-1	-1	-1	-1
294	541	1	2007	ES	-1	1	1	1	1	1	-1	1	1	1	1	1	1	1	3	1	1	1	1	1	1	-1	-1	-1	-1
295	192	2	2007	ES	-1	1	1	1	1	1	-1	1	1	1	2	2	1	2	3	2	2	1	3	1	1	-1	-1	-1	-1
296	196	2	2007	ES	-1	1	1	1	1	1	-1	1	1	1	1	1	1	1	3	1	2	1	1	1	1	-1	-1	-1	-1
297	544	1	2007	ES	-1	1	1	1	1	1	-1	1	1	1	1	1	1	1	1	1	1	1	1	1	1	-1	-1	-1	-1
298	545	1	2007	ES	-1	1	1	1	1	1	-1	1	1	1	1	1	1	2	1	1	2	1	1	1	1	-1	-1	-1	1
299	546	1	2007	ES	-1	1	1	1	1	1	-1	1	1	1	1	1	1	1	3	1	2	1	1	1	1	-1	-1	-1	-1
300	547	1	2007	ES	-1	1	1	1	1	1	-1	1	1	1	1	1	1	1	1	1	1	1	1	1	1	-1	-1	-1	-1
301	150	2	2007	ES	-1	1	1	1	1	1	-1	1	1	2	1	1	1	1	1	3	1	1	1	1	1	-1	-1	-1	-1
302	154	2	2007	ES	-1	1	1	1	1	1	-1	1	1	2	1	1	1	1	3	3	2	1	1	1	1	-1	-1	-1	-1
303	166	2	2007	ES	-1	1	1	1	1	1	-1	1	1	1	1	1	1	1	3	1	1	1	1	1	1	-1	-1	-1	-1
304	163	2	2007	ES	-1	1	1	1	1	1	-1	1	1	1	1	1	1	1	1	1	1	1	1	1	1	-1	-1	-1	-1
305	165	2	2007	ES	-1	1	1	1	1	1	-1	1	1	1	1	1	1	1	1	1	1	1	1	1	1	-1	-1	-1	-1
306	553	1	2007	ES	-1	1	1	1	1	1	-1	1	1	1	1	1	1	1	1	1	1	1	1	1	1	-1	-1	-1	1
307	152	2	2007	ES	-1	1	1	1	1	1	-1	1	1	1	1	1	1	1	3	1	2	1	1	1	1	-1	-1	-1	-1
308	555	1	2007	ES	-1	1	1	1	1	1	-1	1	1	1	1	1	1	1	3	1	2	1	1	1	1	-1	-1	-1	1
309	151	2	2007	ES	-1	1	1	1	1	1	-1	1	1	1	1	1	1	1	3	1	2	1	1	1	1	-1	-1	-1	-1
310	557	1	2007	ES	-1	1	1	1	1	1	-1	1	1	1	1	1	1	1	3	1	2	1	1	1	1	-1	-1	-1	-1
311	155	2	2007	ES	-1	1	1	1	1	1	-1	1	1	1	1	1	1	1	1	1	1	1	1	1	1	-1	-1	-1	-1
312	158	2	2007	ES	-1	1	1	1	1	1	-1	1	1	3	1	1	3	1	1	3	1	1	1	1	1	-1	-1	-1	-1
313	175	2	2007	ES	-1	1	1	1	1	1	-1	1	1	1	1	1	1	1	1	1	1	1	1	1	1	-1	-1	-1	-1
314	561	1	2007	ES	-1	1	1	1	1	1	-1	1	1	3	1	1	1	1	3	3	1	1	1	1	1	-1	-1	-1	1
315	157	2	2007	ES	-1	1	1	1	1	1	-1	1	1	1	2	1	1	1	3	3	1	1	1	1	1	-1	-1	-1	-1
316	174	2	2007	ES	-1	1	1	1	1	1	-1	1	1	1	2	2	1	2	1	1	1	1	1	1	1	-1	-1	-1	-1
317	181	2	2007	ES	-1	1	1	1	1	1	-1	1	1	3	1	1	1	1	3	3	1	1	1	1	1	-1	-1	-1	-1
318	176	2	2007	ES	-1	1	1	1	1	1	-1	1	1	1	1	1	1	1	1	1	1	1	1	1	1	-1	-1	-1	-1
319	172	2	2007	ES	-1	1	1	1	1	1	-1	1	1	1	1	1	1	1	1	1	1	1	1	1	1	-1	-1	-1	-1
320	178	2	2007	ES	-1	1	1	1	1	1	-1	1	1	1	1	1	1	1	1	1	1	1	1	1	1	-1	-1	-1	-1
321	568	1	2007	ES	-1	1	1	1	1	1	-1	1	1	1	1	1	1	1	1	1	1	1	1	1	1	-1	-1	-1	-1
322	569	1	2007	ES	-1	1	1	1	1	1	-1	1	1	3	1	1	1	1	1	3	2	1	1	1	1	-1	-1	-1	1
323	570	1	2007	ES	-1	1	1	1	1	1	-1	1	1	1	1	1	1	1	3	1	2	1	1	1	1	-1	-1	-1	-1
324	571	1	2007	ES	-1	1	1	1	1	1	-1	1	1	1	1	1	1	1	1	1	1	1	1	1	1	-1	-1	-1	1
325	170	2	2007	ES	-1	1	1	1	1	1	-1	1	1	1	1	1	1	1	1	1	1	1	1	1	1	-1	-1	-1	-1
326	573	1	2007	ES	-1	1	1	1	1	1	-1	1	1	1	1	1	1	1	1	1	1	1	1	1	1	-1	-1	-1	-1
327	574	1	2007	ES	-1	1	1	1	1	1	-1	1	1	1	1	1	1	1	3	1	2	1	1	1	1	-1	-1	-1	-1
328	161	2	2007	ES	-1	1	1	1	1	1	-1	1	1	1	1	1	1	1	3	1	1	1	1	1	1	-1	-1	-1	-1
329	171	2	2007	ES	-1	1	1	1	1	1	-1	1	1	1	1	1	1	1	1	1	1	1	1	1	1	-1	-1	-1	-1
330	169	2	2007	ES	-1	1	1	1	1	1	-1	1	1	1	1	1	1	1	1	1	1	1	1	1	1	-1	-1	-1	-1
331	578	1	2007	ES	-1	1	1	1	1	1	-1	1	1	1	1	1	1	1	1	1	1	1	1	1	1	-1	-1	-1	-1
332	579	1	2007	ES	-1	1	1	1	1	1	-1	1	1	1	1	1	1	1	1	1	1	1	1	1	1	-1	-1	-1	-1
333	180	2	2007	ES	-1	1	1	1	1	1	-1	1	1	1	1	1	1	1	3	1	2	1	1	1	1	-1	-1	-1	-1
334	162	2	2007	ES	-1	1	1	2	1	1	-1	1	1	3	1	1	1	1	3	2	2	1	1	1	1	-1	-1	-1	-1
335	168	2	2007	ES	-1	1	1	1	1	1	-1	1	1	1	2	2	1	1	1	1	2	1	3	1	1	-1	-1	-1	-1
336	164	2	2007	ES	-1	1	1	1	1	1	-1	1	1	1	1	1	1	1	1	1	1	1	1	1	1	-1	-1	-1	1
337	179	2	2007	ES	-1	1	1	1	1	1	-1	1	1	1	1	1	1	1	1	1	1	1	1	1	1	-1	-1	-1	-1
338	585	1	2007	ES	-1	1	1	1	1	1	-1	1	1	1	1	1	1	1	1	1	1	1	1	1	1	-1	-1	-1	-1
339	586	1	2007	ES	-1	1	1	1	1	1	-1	1	1	1	1	1	1	1	1	1	1	1	1	2	1	-1	-1	-1	-1
340	127	2	2007	ES	-1	1	1	1	1	1	-1	1	1	1	1	1	1	1	1	1	1	1	1	1	1	-1	-1	-1	-1
341	588	1	2007	ES	-1	1	1	1	1	1	-1	1	1	1	1	1	1	1	1	1	1	1	1	1	1	-1	-1	-1	-1
342	130	2	2007	ES	-1	1	1	1	1	1	-1	1	1	1	1	1	1	1	1	1	1	1	1	1	1	-1	-1	-1	-1
343	590	1	2007	ES	-1	1	1	2	1	1	-1	1	1	1	1	1	1	1	1	1	2	3	1	1	1	-1	-1	-1	-1
344	128	2	2007	ES	-1	1	1	1	1	1	-1	1	1	1	1	1	1	1	1	3	2	1	1	1	1	-1	-1	-1	-1
345	133	2	2007	ES	-1	1	1	1	1	1	-1	1	1	1	1	1	1	1	1	1	1	1	1	1	1	-1	-1	-1	-1
346	593	1	2007	ES	-1	3	1	2	1	1	-1	1	1	3	1	1	1	1	3	1	2	1	1	1	1	-1	-1	-1	-1
347	135	2	2007	ES	-1	1	1	1	1	1	-1	1	1	1	1	1	1	1	1	1	1	1	1	1	1	-1	-1	-1	-1
348	136	2	2007	ES	-1	1	1	1	1	1	-1	1	1	3	1	1	1	1	3	3	2	1	1	1	1	-1	-1	-1	1
349	596	1	2007	ES	-1	1	1	1	1	1	-1	1	1	1	1	1	1	1	1	1	1	1	1	1	1	-1	-1	-1	-1
350	597	1	2007	ES	-1	1	1	1	1	1	-1	1	1	1	2	2	1	2	3	2	2	1	1	1	1	-1	-1	-1	-1
351	598	1	2007	ES	-1	1	1	1	1	1	-1	1	1	1	1	1	1	1	1	1	1	1	1	1	1	-1	-1	-1	-1
352	599	1	2007	ES	-1	1	1	1	1	1	-1	1	1	1	1	1	1	1	1	1	1	1	1	1	1	-1	-1	-1	-1
353	600	1	2007	ES	-1	1	1	1	1	1	-1	1	1	1	3	3	1	1	1	3	3	1	1	1	1	-1	-1	-1	-1
354	601	1	2007	ES	-1	1	1	1	1	1	-1	1	1	1	2	2	1	1	1	3	1	1	1	1	1	-1	-1	-1	-1
355	140	2	2007	ES	-1	1	1	1	1	1	-1	1	1	1	1	1	1	1	3	3	2	1	1	1	1	-1	-1	-1	1
356	143	2	2007	ES	-1	1	1	1	1	1	-1	1	1	1	1	1	1	1	1	1	1	1	1	1	1	-1	-1	-1	-1
357	137	2	2007	ES	-1	1	1	1	1	1	-1	1	1	1	1	1	1	1	1	1	1	1	1	1	1	-1	-1	-1	-1
358	605	1	2007	ES	-1	1	1	1	1	1	-1	1	1	1	1	1	1	1	3	1	2	3	1	1	1	-1	-1	-1	-1
359	138	2	2007	ES	-1	1	1	1	1	1	-1	1	1	1	3	1	1	1	3	1	2	3	1	1	1	-1	-1	-1	-1
360	141	2	2007	ES	-1	1	1	1	1	1	-1	1	1	1	1	1	1	1	3	3	2	1	1	1	1	-1	-1	-1	-1
361	145	2	2007	ES	-1	1	1	1	1	1	-1	1	1	1	1	1	1	1	3	3	2	3	3	1	1	-1	-1	-1	-1
362	142	2	2007	ES	-1	1	1	1	1	1	-1	1	1	1	2	1	3	3	3	3	2	3	1	1	1	-1	-1	-1	-1
363	610	1	2007	ES	-1	1	1	1	1	1	-1	1	1	1	1	1	1	1	1	1	1	1	1	1	1	-1	-1	-1	-1
364	146	2	2007	ES	-1	1	1	1	1	1	-1	1	1	1	1	1	1	1	1	1	1	1	1	1	1	-1	-1	-1	-1
365	612	1	2007	ES	-1	1	1	1	1	1	-1	1	1	1	1	1	1	1	1	1	1	1	1	1	1	-1	-1	-1	-1
366	613	1	2007	ES	-1	1	1	1	1	1	-1	1	1	1	1	1	1	1	3	1	2	1	1	1	1	-1	-1	-1	1
367	119	2	2007	ES	-1	1	1	1	1	1	-1	1	1	1	1	1	1	1	1	1	1	1	1	1	1	-1	-1	-1	-1
368	112	2	2007	ES	-1	1	1	1	1	1	-1	1	1	1	1	1	1	1	1	1	1	1	1	1	1	-1	-1	-1	-1
369	149	2	2007	ES	-1	1	1	1	1	1	-1	1	1	1	1	1	1	1	1	1	1	1	1	1	1	-1	-1	-1	-1
370	617	1	2007	ES	-1	1	1	1	1	1	-1	1	1	1	1	1	3	1	3	3	1	3	1	1	1	-1	-1	-1	-1
371	618	1	2007	ES	-1	1	1	1	1	1	-1	1	1	1	1	1	1	1	1	1	1	1	1	3	1	-1	-1	-1	-1
372	619	1	2007	ES	-1	1	1	1	1	1	-1	1	1	1	1	1	3	1	1	1	1	3	1	1	1	-1	-1	-1	1
373	102	2	2007	ES	-1	1	1	1	1	1	-1	1	1	1	1	1	1	1	1	1	1	1	1	1	1	-1	-1	-1	-1
374	621	1	2007	ES	-1	1	1	1	1	1	-1	1	1	1	1	1	1	1	3	1	1	1	1	1	1	-1	-1	-1	-1
375	622	1	2007	ES	-1	1	1	1	1	1	-1	1	1	1	1	1	1	1	1	1	2	1	1	1	1	-1	-1	-1	-1
376	101	2	2007	ES	-1	1	1	1	1	1	-1	1	1	1	1	1	1	1	3	3	1	1	1	1	1	-1	-1	-1	-1
377	122	2	2007	ES	-1	1	1	1	1	1	-1	1	1	1	1	1	1	1	1	1	1	1	1	1	1	-1	-1	-1	-1
378	124	2	2007	ES	-1	1	1	1	1	1	-1	1	1	1	1	1	1	1	1	1	1	1	1	1	1	-1	-1	-1	-1
379	144	2	2007	ES	-1	1	1	1	1	1	-1	1	1	1	1	1	1	1	3	1	2	1	1	1	1	-1	-1	-1	-1
380	117	2	2007	ES	-1	1	1	1	1	1	-1	1	1	1	2	1	1	1	1	1	2	1	1	1	1	-1	-1	-1	-1
381	110	2	2007	ES	-1	1	1	1	1	1	-1	1	1	1	1	1	1	1	1	1	1	1	1	1	1	-1	-1	-1	-1
382	111	2	2007	ES	-1	1	1	1	1	1	-1	1	1	1	2	1	1	1	1	1	2	1	1	1	1	-1	-1	-1	1
383	106	2	2007	ES	-1	1	1	1	1	1	-1	1	1	1	1	1	1	1	1	1	1	1	1	1	1	-1	-1	-1	-1
384	125	2	2007	ES	-1	1	1	1	1	1	-1	1	1	1	1	1	1	1	1	1	1	1	1	1	1	-1	-1	-1	-1
385	632	1	2007	GE	-1	1	1	1	1	1	-1	1	1	1	1	1	1	1	1	1	1	-1	1	1	1	-1	-1	-1	-1
386	244	2	2007	GE	-1	1	1	1	1	1	-1	1	1	1	1	1	1	1	1	1	1	1	1	1	1	-1	-1	-1	1
387	2084	1	2007	FR	-1	1	1	1	1	1	-1	1	1	1	1	1	1	1	1	1	2	2	1	1	1	-1	-1	-1	2
388	2085	1	2007	FR	-1	1	1	1	1	1	-1	1	1	1	1	1	1	1	1	1	2	2	1	1	1	-1	-1	-1	1
389	2086	1	2007	FR	-1	1	1	1	1	1	-1	1	1	1	1	1	1	1	1	1	-1	-1	1	1	1	-1	-1	-1	-1
390	2087	1	2007	FR	-1	1	1	1	1	1	-1	1	1	1	1	1	-1	2	3	3	2	1	3	1	1	-1	-1	-1	1
391	2088	1	2007	FR	-1	2	1	1	1	1	-1	1	1	2	1	1	1	1	1	1	2	-1	2	1	1	-1	-1	-1	-1
392	2089	1	2007	FR	-1	1	1	1	1	1	-1	1	1	1	1	1	1	1	1	1	1	2	1	1	1	-1	-1	-1	-1
393	2090	1	2007	FR	-1	1	1	1	1	1	-1	1	1	1	1	1	1	1	1	1	1	-1	1	1	1	-1	-1	-1	-1
394	2091	1	2007	FR	-1	1	1	1	1	1	-1	1	1	1	1	1	1	2	1	1	2	-1	1	1	1	-1	-1	-1	1
395	2092	1	2007	FR	-1	1	1	1	1	1	-1	1	1	1	3	1	1	1	1	1	1	-1	1	1	1	-1	-1	-1	-1
396	2093	1	2007	FR	-1	1	1	1	1	1	-1	1	1	2	1	1	1	1	1	1	1	-1	1	1	1	-1	-1	-1	1
397	2094	1	2007	FR	-1	1	1	1	1	1	-1	1	1	1	1	1	1	1	1	1	2	-1	1	1	1	-1	-1	-1	-1
398	2095	1	2007	FR	-1	1	1	1	1	1	-1	1	1	1	1	1	1	1	1	1	1	-1	1	1	1	-1	-1	-1	-1
399	2096	1	2007	FR	-1	1	1	1	1	1	-1	1	1	3	1	1	1	1	1	1	-1	-1	1	1	1	-1	-1	-1	1
400	2097	1	2007	FR	-1	3	1	1	1	1	-1	1	1	3	1	1	1	2	3	2	-1	-1	1	1	1	-1	-1	-1	-1
401	2098	1	2007	FR	-1	1	1	1	1	1	-1	1	1	3	1	1	1	1	1	1	2	-1	1	1	1	-1	-1	-1	-1
402	649	1	2007	GE	-1	1	1	1	1	1	-1	1	-1	1	1	1	1	1	3	3	2	-1	1	1	1	-1	-1	-1	-1
403	2099	1	2007	FR	-1	1	1	1	1	1	-1	1	1	1	1	1	1	1	1	1	1	-1	1	1	1	-1	-1	-1	-1
404	2100	1	2007	FR	-1	1	1	1	1	1	-1	1	1	1	1	1	1	1	1	1	1	-1	1	1	1	-1	-1	-1	1
405	2101	1	2007	FR	-1	1	1	1	1	1	-1	1	1	1	2	1	3	1	3	1	1	1	1	-1	1	-1	-1	-1	-1
406	2102	1	2007	FR	-1	1	1	1	1	1	-1	1	1	1	1	1	1	1	1	1	1	-1	1	1	1	-1	-1	-1	-1
407	2103	1	2007	FR	-1	1	1	1	1	1	-1	1	1	1	1	1	1	1	1	1	1	-1	1	1	1	-1	-1	-1	-1
408	2104	1	2007	FR	-1	2	1	1	1	1	-1	1	1	1	1	1	1	1	1	2	2	-1	1	1	1	-1	-1	-1	-1
409	2105	1	2007	FR	-1	1	1	1	1	1	-1	1	1	1	1	1	1	1	1	1	-1	-1	1	1	1	-1	-1	-1	1
410	2106	1	2007	FR	-1	1	1	1	1	1	-1	1	1	1	1	1	1	1	1	1	1	-1	1	1	1	-1	-1	-1	1
411	2107	1	2007	FR	-1	1	1	1	1	1	-1	1	1	1	1	1	1	1	1	1	1	-1	1	1	1	-1	-1	-1	-1
412	2108	1	2007	FR	-1	1	1	1	1	1	-1	1	1	3	1	1	1	1	1	1	1	-1	1	1	1	-1	-1	-1	-1
413	2109	1	2007	FR	-1	3	1	1	1	1	-1	1	1	1	1	1	1	1	1	1	2	-1	1	1	1	-1	-1	-1	-1
414	2110	1	2007	FR	-1	1	1	1	1	1	-1	1	1	1	1	1	1	1	1	1	-1	1	1	1	1	-1	-1	-1	-1
415	2111	1	2007	FR	-1	1	1	1	1	1	-1	1	1	1	1	1	1	1	3	1	-1	-1	1	1	1	-1	-1	-1	-1
416	2112	1	2007	FR	-1	1	1	1	1	1	-1	1	1	1	1	1	1	1	1	1	1	1	1	1	1	-1	-1	-1	1
417	2113	1	2007	FR	-1	1	1	1	1	1	-1	1	1	1	1	1	1	1	1	1	1	-1	1	1	1	-1	-1	-1	1
418	2114	1	2007	FR	-1	1	1	1	1	1	-1	1	1	1	1	1	1	1	1	1	1	-1	1	1	1	-1	-1	-1	1
419	2115	1	2007	FR	-1	1	1	1	1	1	-1	1	1	1	1	1	1	1	3	1	2	-1	1	1	1	-1	-1	-1	1
420	2116	1	2007	FR	-1	1	1	1	1	1	-1	1	1	3	1	1	1	1	1	1	2	-1	1	1	1	-1	-1	-1	-1
421	2117	1	2007	FR	-1	1	1	1	1	1	-1	1	1	1	1	1	1	1	1	1	1	-1	1	1	1	-1	-1	-1	-1
422	2118	1	2007	FR	-1	1	1	1	1	1	-1	1	1	1	1	1	1	1	1	2	1	-1	1	1	1	-1	-1	-1	-1
423	2119	1	2007	FR	-1	3	1	1	1	1	-1	1	1	1	1	1	1	1	1	1	2	-1	1	1	1	-1	-1	-1	-1
424	2120	1	2007	FR	-1	1	1	1	1	1	-1	1	1	1	1	1	1	1	1	1	2	-1	1	1	1	-1	-1	-1	-1
425	2121	1	2007	FR	-1	1	1	1	1	1	-1	1	1	2	1	1	1	1	1	1	1	3	1	1	1	-1	-1	-1	1
426	2122	1	2007	FR	-1	1	1	1	1	1	-1	1	1	1	1	1	1	1	1	1	1	-1	1	1	1	-1	-1	-1	1
427	2123	1	2007	FR	-1	1	1	1	1	1	-1	1	1	1	1	1	1	1	3	1	2	-1	1	1	1	-1	-1	-1	-1
428	2124	1	2007	FR	-1	1	1	1	1	1	-1	1	1	3	3	1	1	1	1	3	1	-1	1	1	1	-1	-1	-1	-1
429	2125	1	2007	FR	-1	1	1	1	1	1	-1	1	1	1	1	1	1	1	1	3	-1	-1	1	1	1	-1	-1	-1	-1
430	2126	1	2007	FR	-1	1	1	1	1	1	-1	1	1	3	1	1	1	2	1	3	2	-1	1	1	1	-1	-1	-1	-1
431	2127	1	2007	FR	-1	1	1	1	1	1	-1	1	1	3	1	1	1	1	1	1	2	-1	1	1	1	-1	-1	-1	1
432	2128	1	2007	FR	-1	1	1	1	1	1	-1	1	1	1	1	1	1	1	1	1	2	-1	1	1	1	-1	-1	-1	-1
433	2129	1	2007	FR	-1	1	1	1	1	1	-1	1	1	1	1	1	1	1	1	1	-1	-1	1	1	1	-1	-1	-1	-1
434	2130	1	2007	FR	-1	1	1	1	1	1	-1	1	1	1	3	-1	1	3	1	1	3	1	1	1	1	-1	-1	-1	-1
435	2131	1	2007	FR	-1	1	1	1	1	1	-1	1	1	1	1	1	1	1	1	1	2	-1	1	1	1	-1	-1	-1	1
436	2132	1	2007	FR	-1	1	1	1	1	1	-1	1	1	1	1	1	1	1	3	1	1	1	1	1	1	-1	-1	-1	-1
437	2133	1	2007	FR	-1	1	1	1	1	1	-1	1	1	1	2	3	3	1	3	3	2	1	3	1	1	-1	-1	-1	-1
438	2134	1	2007	FR	-1	1	1	1	1	1	-1	1	1	1	3	3	3	3	1	1	1	-1	1	1	1	-1	-1	-1	-1
439	2135	1	2007	FR	-1	1	1	1	1	1	-1	1	1	1	1	1	-1	1	1	1	1	-1	1	1	1	-1	-1	-1	-1
440	2136	1	2007	FR	-1	2	1	1	1	1	-1	1	1	2	2	1	2	2	1	2	1	-1	1	1	1	-1	-1	-1	-1
441	2137	1	2007	FR	-1	1	1	1	1	1	-1	1	1	3	1	1	-1	1	1	1	2	-1	3	1	1	-1	-1	-1	1
442	2138	1	2007	FR	-1	1	1	1	1	1	-1	1	1	1	1	1	1	1	1	1	1	-1	1	1	1	-1	-1	-1	-1
443	2139	1	2007	FR	-1	1	1	1	1	1	-1	1	1	1	1	1	1	1	3	1	2	1	1	1	1	-1	-1	-1	-1
444	2140	1	2007	FR	-1	1	1	1	1	1	-1	1	1	1	1	1	1	1	1	1	1	-1	1	1	1	-1	-1	-1	-1
445	2141	1	2007	FR	-1	1	1	1	1	1	-1	1	1	1	1	2	1	1	1	1	1	-1	1	1	1	-1	-1	-1	1
446	2142	1	2007	FR	-1	1	1	1	1	1	-1	1	1	1	1	1	1	2	3	1	2	-1	1	1	1	-1	-1	-1	1
447	2143	1	2007	FR	-1	1	1	1	1	1	-1	1	1	1	1	1	1	1	1	1	1	1	1	1	1	-1	-1	-1	-1
448	2144	1	2007	FR	-1	1	1	1	1	1	-1	1	1	1	3	1	1	-1	1	1	2	-1	1	1	1	-1	-1	-1	1
449	2145	1	2007	FR	-1	1	1	1	1	1	-1	1	1	1	1	1	1	1	1	1	1	-1	1	1	1	-1	-1	-1	-1
450	2146	1	2007	FR	-1	1	1	1	1	1	-1	1	1	1	2	1	1	1	1	1	1	-1	1	1	1	-1	-1	-1	-1
451	2147	1	2007	FR	-1	1	1	1	1	1	-1	1	1	3	1	1	1	1	1	1	1	-1	1	1	1	-1	-1	-1	-1
452	2148	1	2007	FR	-1	1	1	1	1	1	-1	1	1	1	1	1	1	1	1	1	1	-1	1	1	1	-1	-1	-1	-1
453	2149	1	2007	FR	-1	2	1	1	1	1	-1	1	1	2	1	1	1	1	1	1	3	-1	1	1	1	-1	-1	-1	-1
454	2150	1	2007	FR	-1	1	1	1	1	1	-1	1	1	1	3	3	1	1	1	3	1	-1	3	1	1	-1	-1	-1	-1
455	2151	1	2007	FR	-1	1	1	2	1	1	-1	1	1	1	1	1	1	1	3	3	2	-1	1	1	1	-1	-1	-1	1
456	2152	1	2007	FR	-1	1	1	1	1	1	-1	1	1	1	1	1	1	2	3	3	2	-1	1	1	1	-1	-1	-1	1
457	2153	1	2007	FR	-1	1	1	1	1	1	-1	1	1	1	1	1	1	1	1	1	1	-1	1	1	1	-1	-1	-1	-1
458	2154	1	2007	FR	-1	1	1	1	1	1	-1	1	1	1	1	1	3	1	1	1	1	1	1	1	1	-1	-1	-1	-1
459	2155	1	2007	FR	-1	1	1	1	1	1	-1	1	1	1	1	1	1	1	1	1	1	-1	1	1	1	-1	-1	-1	1
460	2156	1	2007	FR	-1	1	1	1	1	1	-1	1	1	1	1	1	3	1	1	1	2	-1	1	1	1	-1	-1	-1	-1
461	2157	1	2007	FR	-1	1	1	1	1	1	-1	1	1	1	1	1	1	1	3	1	1	-1	1	1	1	-1	-1	-1	-1
462	2158	1	2007	FR	-1	1	1	1	1	1	-1	1	1	2	1	1	1	1	1	2	-1	1	1	1	1	-1	-1	-1	-1
463	2159	1	2007	FR	-1	1	1	1	1	1	-1	1	1	1	1	1	1	1	1	1	1	-1	1	1	1	-1	-1	-1	-1
464	2160	1	2007	FR	-1	1	1	1	1	1	-1	1	1	1	1	1	1	1	1	1	1	-1	1	1	1	-1	-1	-1	-1
465	2161	1	2007	FR	-1	1	1	1	1	1	-1	1	1	1	1	1	1	1	1	1	1	-1	1	1	1	-1	-1	-1	1
466	2162	1	2007	FR	-1	3	1	1	1	1	-1	1	1	1	1	1	1	1	3	1	1	-1	1	1	1	-1	-1	-1	-1
467	255	2	2007	GE	-1	1	1	1	1	1	-1	1	1	1	1	1	1	1	1	1	1	-1	1	1	1	-1	-1	-1	-1
468	715	1	2007	RO	-1	1	1	-1	1	-1	-1	1	1	1	1	1	1	1	1	1	2	-1	3	3	1	-1	-1	-1	1
469	716	1	2007	RO	-1	1	1	-1	1	-1	-1	1	-1	1	1	1	1	1	1	1	2	-1	3	3	1	-1	-1	-1	1
470	717	1	2007	RO	-1	1	1	-1	1	-1	-1	1	1	1	1	1	1	1	1	1	1	-1	3	3	1	-1	-1	-1	1
471	718	1	2007	RO	-1	1	1	-1	1	-1	-1	1	1	1	1	1	1	1	1	1	2	-1	3	3	1	-1	-1	-1	1
472	719	1	2007	RO	-1	1	1	-1	1	-1	-1	1	-1	1	1	1	1	1	1	1	2	-1	3	3	1	-1	-1	-1	-1
473	720	1	2007	PT	-1	1	1	1	1	1	-1	1	1	1	2	1	1	1	3	1	1	-1	1	1	1	-1	-1	-1	-1
474	721	1	2007	PT	-1	1	1	1	1	1	-1	1	1	1	1	1	1	1	3	1	1	-1	3	3	1	-1	-1	-1	-1
475	722	1	2007	PT	-1	1	1	1	1	1	-1	1	1	1	1	1	3	1	1	3	2	-1	1	2	1	-1	-1	-1	-1
476	723	1	2007	PT	-1	1	1	2	1	1	-1	1	1	1	1	1	1	1	1	1	1	-1	1	1	1	-1	-1	-1	-1
477	724	1	2007	PT	-1	1	1	2	1	1	-1	1	1	1	1	1	1	1	3	1	2	1	1	1	1	-1	-1	-1	3
478	256	2	2007	PT	-1	1	1	2	1	1	-1	1	1	1	1	1	1	1	1	3	2	1	2	1	1	-1	-1	-1	1
479	726	1	2007	PT	-1	1	1	2	1	1	-1	1	1	1	2	1	1	1	3	1	2	1	3	1	1	-1	-1	-1	1
480	727	1	2007	PT	-1	1	1	2	1	1	-1	1	1	1	1	1	1	1	3	1	1	1	1	1	1	-1	-1	-1	-1
481	728	1	2007	PT	-1	1	1	1	1	1	-1	1	1	1	1	1	1	1	1	1	1	-1	1	1	1	-1	-1	-1	-1
482	729	1	2007	PT	-1	1	1	1	1	1	-1	1	1	1	1	1	1	1	1	1	1	1	1	1	1	-1	-1	-1	2
483	730	1	2007	PT	-1	1	1	1	1	1	-1	1	1	1	1	1	1	1	1	1	1	-1	1	1	1	-1	-1	-1	-1
484	731	1	2007	PT	-1	1	1	1	1	1	-1	1	1	1	1	1	1	1	1	1	1	-1	1	1	1	-1	-1	-1	-1
485	732	1	2007	SK	-1	1	1	1	1	1	-1	1	1	1	1	1	1	1	1	1	1	1	1	1	1	-1	-1	-1	-1
486	733	1	2007	SK	-1	1	1	1	1	1	-1	1	1	3	1	1	1	1	3	3	2	-1	3	3	1	-1	-1	-1	1
487	317	2	2007	SK	-1	1	1	1	1	1	-1	1	1	3	1	1	1	1	3	3	2	1	3	3	1	-1	-1	-1	1
488	735	1	2007	SK	-1	1	1	1	1	1	-1	1	1	1	1	1	1	1	1	1	2	-1	1	1	1	-1	-1	-1	-1
489	736	1	2007	SK	-1	1	1	1	1	1	-1	1	1	1	1	1	1	1	1	1	1	-1	1	1	1	-1	-1	-1	1
490	737	1	2007	SK	-1	1	1	1	1	1	-1	1	1	3	3	3	1	1	3	3	2	-1	3	1	1	-1	-1	-1	-1
491	738	1	2007	SK	-1	1	1	1	1	1	-1	1	1	1	1	1	1	1	3	3	2	3	1	1	1	-1	-1	-1	-1
492	739	1	2007	SK	-1	1	1	1	1	1	-1	1	1	1	1	1	1	3	1	1	1	-1	1	1	1	-1	-1	-1	-1
493	318	2	2007	SK	-1	1	1	1	1	1	-1	1	1	1	1	1	1	1	3	1	1	-1	1	1	1	-1	-1	-1	-1
494	741	1	2007	SK	-1	1	1	1	1	1	-1	1	1	1	1	1	1	1	3	1	1	-1	1	1	1	-1	-1	-1	-1
495	320	2	2007	CZ	-1	1	1	1	1	1	-1	1	1	1	1	1	1	1	1	1	2	-1	3	1	1	-1	-1	-1	1
496	743	1	2007	CZ	-1	2	1	1	1	1	-1	1	1	1	1	1	1	3	3	2	3	-1	3	1	1	-1	-1	-1	3
497	744	1	2007	CZ	-1	1	1	2	1	1	-1	1	1	1	1	1	1	1	1	1	1	-1	1	1	1	-1	-1	-1	1
498	745	1	2007	CZ	-1	1	1	2	1	1	-1	1	1	1	3	3	1	3	2	1	3	1	1	1	1	-1	-1	-1	3
499	746	1	2007	CZ	-1	1	1	1	1	1	-1	1	1	3	1	1	1	1	1	3	2	1	3	1	1	-1	-1	-1	3
500	747	1	2007	CZ	-1	1	1	1	1	1	-1	1	1	3	1	3	3	3	3	3	2	1	3	1	1	-1	-1	-1	3
501	338	2	2007	CZ	-1	1	1	2	1	1	-1	1	1	3	2	1	3	3	3	3	2	1	3	1	1	-1	-1	-1	-1
502	749	1	2007	CZ	-1	1	1	2	1	1	-1	1	1	3	1	1	1	1	1	3	3	-1	3	1	1	-1	-1	-1	-1
503	750	1	2007	CZ	-1	1	1	1	1	1	-1	1	1	1	1	1	3	1	3	1	1	-1	1	1	1	-1	-1	-1	1
504	751	1	2007	CZ	-1	1	1	2	1	1	-1	1	1	3	1	1	3	1	1	3	2	-1	1	2	1	-1	-1	-1	-1
505	752	1	2007	CZ	-1	1	1	2	1	1	-1	1	1	1	1	1	1	1	1	3	2	1	3	1	1	-1	-1	-1	1
506	322	2	2007	CZ	-1	1	1	1	1	1	-1	1	1	3	1	1	3	3	3	3	2	1	3	1	3	-1	-1	-1	3
507	754	1	2007	CZ	-1	2	1	1	1	1	-1	1	1	3	1	1	1	1	3	3	2	-1	3	1	1	-1	-1	-1	-1
508	755	1	2007	CZ	-1	1	1	1	1	1	-1	1	1	1	1	1	1	1	3	1	1	-1	1	1	1	-1	-1	-1	-1
509	756	1	2007	CZ	-1	1	1	1	1	1	-1	1	1	1	1	1	1	1	1	1	2	-1	3	1	1	-1	-1	-1	3
510	757	1	2007	CZ	-1	1	1	2	1	1	-1	1	1	1	1	1	1	1	3	1	2	1	3	2	1	-1	-1	-1	2
511	326	2	2007	CZ	-1	1	1	1	1	1	-1	1	1	3	2	1	3	1	1	3	2	-1	3	1	1	-1	-1	-1	1
512	759	1	2007	CZ	-1	1	1	2	1	1	-1	1	1	1	1	1	1	1	3	1	2	1	3	1	1	-1	-1	-1	1
513	760	1	2007	CZ	-1	1	1	2	1	1	-1	1	1	3	1	1	1	2	3	3	2	1	3	1	1	-1	-1	-1	-1
514	761	1	2007	CZ	-1	1	1	1	1	1	-1	1	1	3	1	1	1	2	3	3	2	1	1	1	2	-1	-1	-1	1
515	344	2	2007	CZ	-1	1	1	2	1	1	-1	1	1	1	1	1	1	1	1	1	1	-1	1	1	1	-1	-1	-1	1
516	332	2	2007	CZ	-1	1	1	2	1	1	-1	1	1	1	1	1	1	1	1	1	1	1	1	1	1	-1	-1	-1	1
517	764	1	2007	CZ	-1	2	1	1	2	1	-1	2	1	2	1	2	2	1	3	1	2	1	3	1	3	-1	-1	-1	-1
518	324	2	2007	CZ	-1	1	1	2	1	2	-1	1	1	3	1	1	1	1	3	1	2	1	3	1	1	-1	-1	-1	1
519	331	2	2007	CZ	-1	1	1	2	1	1	-1	1	1	1	1	1	1	1	1	1	1	1	1	1	1	-1	-1	-1	2
520	339	2	2007	CZ	-1	3	1	1	1	1	-1	1	1	3	1	1	3	1	1	1	2	1	1	1	1	-1	-1	-1	1
521	345	2	2007	CZ	-1	1	1	2	1	1	-1	1	1	1	1	1	1	1	3	3	2	3	3	1	1	-1	-1	-1	3
522	769	1	2007	CZ	-1	1	1	1	1	1	-1	1	1	1	1	1	1	1	3	3	2	1	1	1	1	-1	-1	-1	-1
523	770	1	2007	CZ	-1	3	1	1	1	1	-1	1	1	3	1	3	1	2	1	3	2	1	1	1	1	-1	-1	-1	3
524	771	1	2007	GE	-1	1	1	1	1	1	-1	1	1	1	1	1	1	1	3	1	2	-1	3	3	1	-1	-1	-1	1
525	350	2	2007	CZ	-1	1	1	2	1	1	-1	1	1	1	1	1	1	1	1	1	2	1	3	1	1	-1	-1	-1	1
526	773	1	2007	CZ	-1	1	1	2	1	1	-1	1	1	1	1	1	1	1	1	1	2	1	1	1	1	-1	-1	-1	1
527	774	1	2007	CZ	-1	2	1	1	1	1	-1	1	1	3	2	2	1	1	3	3	2	1	3	1	3	-1	-1	-1	1
528	775	1	2007	CZ	-1	1	1	2	1	2	-1	1	1	1	1	1	1	1	3	2	2	1	3	1	1	-1	-1	-1	-1
529	330	2	2007	CZ	-1	1	1	2	1	1	-1	1	1	3	1	1	1	1	3	1	2	1	1	3	1	-1	-1	-1	-1
530	777	1	2007	CZ	-1	1	1	1	1	1	-1	1	1	3	1	1	1	1	3	3	2	-1	3	1	1	-1	-1	-1	3
531	778	1	2007	CZ	-1	3	1	1	1	1	-1	1	1	3	1	1	3	1	3	3	3	-1	1	1	1	-1	-1	-1	3
532	325	2	2007	CZ	-1	1	1	2	1	1	-1	1	1	3	1	1	1	1	1	3	1	1	3	1	1	-1	-1	-1	3
533	780	1	2007	CZ	-1	1	2	1	1	1	-1	1	1	3	1	1	1	1	3	1	2	1	1	1	1	-1	-1	-1	1
534	781	1	2007	CZ	-1	1	1	1	1	1	-1	1	1	1	1	1	1	2	3	3	2	1	3	1	1	-1	-1	-1	3
535	782	1	2007	CZ	-1	1	1	2	1	2	-1	1	1	3	1	1	1	1	1	3	2	1	3	1	1	-1	-1	-1	2
536	337	2	2007	CZ	-1	1	1	2	1	1	-1	1	1	1	1	1	1	1	1	1	2	1	3	1	1	-1	-1	-1	3
537	784	1	2007	CZ	-1	1	1	2	1	1	-1	1	1	1	2	2	1	2	3	1	2	3	3	1	3	-1	-1	-1	1
538	327	2	2007	CZ	-1	1	1	2	1	1	-1	1	1	1	1	1	1	1	1	1	3	3	3	1	1	-1	-1	-1	1
539	786	1	2007	CZ	-1	3	1	2	1	1	-1	1	1	1	3	3	1	1	3	3	2	3	3	1	1	-1	-1	-1	3
540	787	1	2007	CZ	-1	1	1	2	1	1	-1	1	1	1	1	1	1	1	3	1	2	-1	1	1	1	-1	-1	-1	-1
541	788	1	2007	PL	-1	1	1	1	1	1	-1	1	1	3	1	1	3	1	1	3	2	-1	1	1	1	-1	-1	-1	-1
542	789	1	2007	PL	-1	1	1	1	1	1	-1	1	1	3	1	1	3	1	1	3	2	-1	3	1	1	-1	-1	-1	-1
543	790	1	2007	PL	-1	1	1	1	1	1	-1	1	1	1	1	1	1	1	1	2	3	-1	1	3	1	-1	-1	-1	-1
544	791	1	2008	CZ	-1	1	1	2	1	1	2	1	1	1	1	1	1	1	1	1	2	1	1	1	1	-1	-1	-1	-1
545	778	2	2008	CZ	-1	1	1	1	1	1	1	1	1	1	1	2	2	1	1	2	2	1	3	1	1	-1	-1	-1	-1
546	747	2	2008	CZ	-1	1	1	1	1	1	1	1	1	3	1	1	1	1	1	3	2	1	3	1	1	-1	-1	-1	2
547	794	1	2008	CZ	-1	1	1	2	1	1	2	1	1	1	3	1	1	1	3	1	2	-1	1	1	1	-1	-1	-1	3
548	350	3	2008	CZ	-1	1	1	2	1	1	2	1	1	1	1	1	1	1	3	1	2	3	3	1	1	-1	-1	-1	1
549	796	1	2008	CZ	-1	1	1	2	1	1	2	1	1	2	1	1	2	2	1	2	2	1	3	1	1	-1	-1	-1	-1
550	781	2	2008	CZ	-1	1	1	1	1	1	1	1	1	3	1	1	1	1	1	3	2	1	1	1	1	-1	-1	-1	1
551	798	1	2008	CZ	-1	1	1	1	1	1	1	1	1	1	1	1	1	1	1	1	1	1	3	1	1	-1	-1	-1	3
552	799	1	2008	CZ	-1	2	1	1	1	1	1	1	1	1	1	1	1	1	1	1	1	1	1	1	1	-1	-1	-1	3
553	345	3	2008	CZ	-1	1	1	2	1	1	2	1	1	1	1	1	1	1	-1	1	2	-1	3	1	1	-1	-1	-1	3
554	782	2	2008	CZ	-1	1	1	1	1	1	1	1	1	1	1	1	1	1	1	1	1	1	1	1	1	-1	-1	-1	1
555	324	3	2008	CZ	-1	1	1	2	1	1	2	1	1	3	1	1	1	1	3	1	2	1	1	1	1	-1	-1	-1	1
556	330	3	2008	CZ	-1	1	1	2	1	1	2	1	1	1	1	1	1	1	1	1	1	-1	1	1	1	-1	-1	-1	-1
557	339	3	2008	CZ	-1	1	1	2	1	1	2	1	1	1	1	1	1	1	3	1	1	3	1	1	1	-1	-1	-1	-1
558	803	1	2008	CZ	-1	1	1	1	1	1	1	1	1	1	1	2	2	2	3	2	2	3	3	1	1	-1	-1	-1	-1
559	337	3	2008	CZ	-1	3	1	1	1	1	1	1	1	3	1	1	1	1	3	1	2	1	1	1	1	-1	-1	-1	3
560	331	3	2008	CZ	-1	1	1	2	1	1	2	1	1	1	1	1	1	1	1	1	1	-1	3	1	1	-1	-1	-1	1
561	804	1	2008	CZ	-1	1	1	1	1	1	1	1	1	1	1	1	1	1	3	1	2	3	3	1	1	-1	-1	-1	-1
562	786	2	2008	CZ	-1	1	1	1	1	1	1	1	1	1	1	1	1	1	3	1	1	-1	1	1	1	-1	-1	-1	1
563	764	2	2008	CZ	-1	2	1	1	1	1	1	1	1	3	1	1	1	1	3	2	2	1	3	1	1	-1	-1	-1	-1
564	773	2	2008	CZ	-1	1	1	2	1	1	2	1	1	1	1	1	1	1	1	1	2	-1	3	1	1	-1	-1	-1	1
565	751	2	2008	CZ	-1	1	1	2	1	1	2	1	1	1	1	1	1	1	1	1	1	1	1	1	1	-1	-1	-1	-1
566	326	3	2008	CZ	-1	1	1	1	1	1	1	1	1	1	2	1	3	2	3	3	2	1	3	3	1	-1	-1	-1	1
567	746	2	2008	CZ	-1	1	1	1	1	1	1	1	1	1	1	1	1	1	1	3	2	1	1	1	1	-1	-1	-1	1
568	322	3	2008	CZ	-1	1	1	1	1	1	1	1	1	1	1	1	1	1	1	1	2	-1	3	1	1	-1	-1	-1	2
569	805	1	2008	CZ	-1	1	1	1	1	1	1	1	1	1	1	1	1	1	1	1	2	-1	1	1	1	-1	-1	-1	3
570	752	2	2008	CZ	-1	1	1	2	1	1	2	1	1	1	1	1	1	1	1	1	2	-1	3	1	1	-1	-1	-1	1
571	338	3	2008	CZ	-1	1	1	2	1	1	2	1	1	1	1	1	1	1	1	1	2	1	3	1	1	-1	-1	-1	-1
572	761	2	2008	CZ	-1	1	1	1	1	1	1	1	1	3	1	1	1	1	1	1	1	1	1	1	1	-1	-1	-1	1
573	787	2	2008	CZ	-1	1	1	1	1	1	1	1	1	1	1	1	1	1	1	1	2	-1	3	1	1	-1	-1	-1	1
574	750	2	2008	CZ	-1	1	1	1	1	1	1	1	1	1	1	1	1	1	1	1	2	1	1	1	1	-1	-1	-1	3
575	320	3	2008	CZ	-1	1	1	1	1	1	1	1	1	1	1	1	1	1	1	1	2	1	3	3	1	-1	-1	-1	1
576	344	3	2008	CZ	-1	1	1	1	1	1	1	1	1	1	1	1	1	1	1	1	1	1	1	1	1	-1	-1	-1	1
577	806	1	2008	CZ	-1	1	1	1	1	1	1	1	1	1	2	1	1	2	-1	1	2	-1	3	3	1	-1	-1	-1	1
578	754	2	2008	CZ	-1	1	1	1	1	1	1	1	1	1	1	1	1	1	3	1	2	1	1	1	1	-1	-1	-1	1
579	770	2	2008	CZ	-1	1	1	2	1	1	2	1	1	1	1	1	3	1	1	1	2	-1	3	1	1	-1	-1	-1	1
580	807	1	2008	CZ	-1	1	1	1	1	1	1	1	1	1	1	2	2	2	3	2	2	1	1	1	1	-1	-1	-1	2
581	808	1	2008	CZ	-1	1	1	2	1	1	2	1	1	1	3	1	1	3	1	1	3	-1	1	1	1	-1	-1	-1	1
582	809	1	2008	CZ	-1	1	1	2	1	1	2	1	1	1	1	1	1	1	1	3	2	-1	3	1	1	-1	-1	-1	3
583	810	1	2008	CZ	-1	1	1	2	1	1	2	1	1	1	1	1	1	1	1	3	3	-1	1	1	1	-1	-1	-1	-1
584	811	1	2008	CZ	-1	1	1	2	1	1	2	1	1	1	1	1	1	1	3	1	2	1	3	1	1	-1	-1	-1	1
585	812	1	2008	CZ	-1	1	1	1	1	1	1	1	1	1	2	2	2	2	1	3	2	-1	3	1	1	-1	-1	-1	1
586	755	2	2008	CZ	-1	1	1	1	1	1	1	1	1	1	1	1	1	1	3	1	1	-1	1	1	1	-1	-1	-1	1
587	813	1	2008	CZ	-1	1	1	2	1	1	2	1	1	1	1	1	1	1	3	1	1	-1	3	1	1	-1	-1	-1	1
588	814	1	2008	CZ	-1	1	1	1	1	1	1	1	1	3	1	1	1	1	3	3	2	1	3	1	1	-1	-1	-1	2
589	815	1	2008	CZ	-1	1	1	1	1	1	1	1	1	2	1	2	2	2	1	2	1	-1	1	1	1	-1	-1	-1	-1
590	319	2	2008	CZ	-1	1	1	1	1	1	1	1	1	3	1	1	1	1	3	1	2	1	1	1	1	-1	-1	-1	1
591	816	1	2008	CZ	-1	1	1	1	1	1	1	1	1	1	1	1	1	1	1	1	1	-1	1	1	1	-1	-1	-1	3
592	817	1	2008	CZ	-1	1	1	1	1	1	1	1	1	1	1	1	1	1	1	1	1	-1	1	1	1	-1	-1	-1	3
593	818	1	2008	CZ	-1	1	1	1	1	1	1	1	1	1	1	1	1	1	3	3	2	-1	3	1	1	-1	-1	-1	3
594	819	1	2008	CZ	-1	1	1	1	1	1	1	1	1	1	1	1	3	-1	3	3	2	-1	3	1	1	-1	-1	-1	3
595	820	1	2008	SK	-1	1	1	1	1	1	1	1	1	3	1	1	1	1	1	1	1	1	1	1	1	-1	-1	-1	-1
596	317	3	2008	SK	-1	1	1	1	1	1	1	1	1	1	1	1	1	1	3	3	2	1	3	1	1	-1	-1	-1	1
597	318	3	2008	SK	-1	1	1	1	1	1	1	1	1	1	1	1	1	1	3	1	2	1	3	3	1	-1	-1	-1	3
598	821	1	2008	SK	-1	1	1	1	1	1	1	1	1	1	1	1	1	1	3	3	2	1	3	1	1	-1	-1	-1	1
599	739	2	2008	SK	-1	1	1	1	1	1	1	1	1	2	1	1	1	1	1	1	1	-1	1	1	1	-1	-1	-1	3
600	733	2	2008	SK	-1	1	1	1	1	1	1	1	1	1	1	1	1	1	3	1	2	1	3	1	1	-1	-1	-1	-1
601	738	2	2008	SK	-1	1	1	1	1	1	1	1	1	1	1	1	1	1	3	1	2	-1	3	1	1	-1	-1	-1	1
602	736	2	2008	SK	-1	1	1	1	1	1	1	1	1	1	1	1	1	1	1	1	1	-1	1	1	1	-1	-1	-1	1
603	741	2	2008	SK	-1	1	1	1	1	1	1	1	1	1	1	1	1	1	3	1	2	3	1	1	1	-1	-1	-1	1
604	822	1	2008	PL	-1	1	1	1	1	1	1	1	1	1	1	1	1	1	1	1	3	-1	1	1	1	-1	-1	-1	-1
605	823	1	2008	PL	-1	1	1	1	1	1	1	1	1	2	2	2	2	2	1	1	1	-1	1	1	1	-1	-1	-1	-1
606	824	1	2008	PL	-1	1	1	1	2	1	1	1	1	3	1	1	1	1	1	2	2	-1	1	1	1	-1	-1	-1	-1
607	825	1	2008	PL	-1	1	1	1	1	1	1	1	1	3	1	1	3	2	1	2	1	-1	3	1	1	-1	-1	-1	-1
608	826	1	2008	PL	-1	1	1	1	1	1	1	1	1	1	1	1	1	2	1	2	2	-1	3	1	1	-1	-1	-1	-1
609	827	1	2008	PL	-1	1	1	1	1	1	2	1	1	3	1	3	1	1	1	3	1	-1	3	1	1	-1	-1	-1	-1
610	828	1	2008	PL	-1	1	1	2	1	1	2	1	1	3	1	1	1	1	1	1	1	-1	3	1	2	-1	-1	-1	-1
611	829	1	2008	PL	-1	1	1	1	1	1	1	1	1	1	1	1	1	3	1	1	1	-1	3	1	1	-1	-1	-1	-1
612	830	1	2008	PL	-1	1	1	1	1	1	1	1	1	2	1	1	3	2	1	1	2	-1	1	1	1	-1	-1	-1	-1
613	831	1	2008	PL	-1	1	1	1	1	1	1	1	1	1	3	3	1	1	1	1	1	-1	1	1	1	-1	-1	-1	-1
614	501	2	2008	GE	-1	1	1	1	1	1	1	1	1	1	1	1	1	1	1	1	1	1	1	1	1	-1	-1	-1	1
615	510	2	2008	GE	-1	1	1	1	1	1	1	1	1	1	1	1	1	1	3	3	2	1	1	1	1	-1	-1	-1	1
616	632	2	2008	GE	-1	1	1	1	1	1	1	1	1	1	1	1	1	1	1	1	1	1	1	1	1	-1	-1	-1	1
617	242	3	2008	GE	-1	1	1	1	1	1	1	1	1	1	1	1	1	1	1	1	1	1	1	1	1	-1	-1	-1	-1
618	504	2	2008	GE	-1	1	1	2	1	1	2	1	1	3	1	1	1	1	3	3	2	1	3	1	1	-1	-1	-1	1
619	832	1	2008	GE	-1	1	1	1	1	1	1	1	1	2	1	1	1	1	1	1	-1	1	1	1	1	-1	-1	-1	-1
620	649	2	2008	GE	-1	1	1	1	1	1	1	1	1	1	1	1	1	1	1	1	1	1	3	3	3	-1	-1	-1	-1
621	833	1	2008	GE	-1	1	1	1	1	1	1	1	1	3	2	2	3	1	1	3	2	1	1	1	1	-1	-1	-1	-1
622	834	1	2008	GE	-1	1	1	1	1	1	1	1	1	3	1	1	-1	2	3	3	2	1	3	1	1	-1	-1	-1	1
623	246	3	2008	GE	-1	1	1	1	1	1	1	1	1	1	1	1	1	1	1	1	2	1	1	1	1	-1	-1	-1	1
624	518	2	2008	GE	-1	1	1	1	1	1	1	1	1	3	1	1	1	1	1	3	2	1	3	1	1	-1	-1	-1	-1
625	835	1	2008	GE	-1	1	1	1	1	1	1	1	1	1	1	1	1	1	1	1	1	-1	1	3	1	-1	-1	-1	-1
626	836	1	2008	GE	-1	2	1	1	1	1	1	1	1	3	1	1	1	1	3	3	2	3	1	1	1	-1	-1	-1	1
627	233	3	2008	GE	-1	3	1	2	1	1	2	1	1	3	1	1	1	1	3	1	1	1	3	1	1	-1	-1	-1	-1
628	509	2	2008	GE	-1	1	1	1	1	1	1	1	1	1	1	1	1	1	1	1	1	1	3	1	1	-1	-1	-1	-1
629	253	3	2008	GE	-1	3	1	1	1	1	1	1	1	3	1	1	3	1	3	3	2	1	3	1	1	-1	-1	-1	1
630	837	1	2008	GE	-1	1	1	1	1	1	1	1	1	1	1	1	1	1	1	1	1	1	1	1	1	-1	-1	-1	-1
631	838	1	2008	GE	-1	1	1	1	1	1	1	1	1	1	2	2	1	2	3	2	3	1	1	1	1	-1	-1	-1	1
632	517	2	2008	GE	-1	1	1	1	1	1	1	1	1	3	1	1	1	1	1	3	2	-1	1	1	1	-1	-1	-1	1
633	521	2	2008	GE	-1	1	1	1	1	1	1	1	1	3	1	1	1	3	3	3	2	1	3	1	1	-1	-1	-1	1
634	839	1	2008	GE	-1	1	1	2	1	1	2	1	1	3	1	3	2	2	3	1	2	1	3	1	1	-1	-1	-1	1
635	528	2	2008	GE	-1	1	1	1	1	1	1	1	1	1	1	1	3	1	1	1	1	1	1	3	1	-1	-1	-1	1
636	792	1	2008	GE	-1	1	1	1	1	1	1	1	1	1	1	1	1	1	1	1	1	1	1	1	1	-1	-1	-1	-1
637	525	2	2008	GE	-1	1	1	1	1	1	1	1	1	1	1	1	1	1	3	3	2	1	1	1	1	-1	-1	-1	1
638	515	2	2008	GE	-1	1	1	1	1	1	1	1	1	1	1	1	1	1	3	1	2	1	3	1	1	-1	-1	-1	1
639	234	3	2008	GE	-1	1	1	1	1	1	1	1	1	1	1	1	1	1	3	1	2	1	3	1	1	-1	-1	-1	1
640	248	3	2008	GE	-1	1	1	1	1	1	1	1	1	1	1	1	2	2	3	1	1	1	3	3	1	-1	-1	-1	1
641	531	2	2008	GE	-1	1	1	1	1	1	1	1	1	3	1	1	1	1	3	3	2	1	3	1	1	-1	-1	-1	1
642	235	3	2008	GE	-1	1	1	1	1	1	1	1	1	1	1	1	1	1	3	3	2	1	1	1	1	-1	-1	-1	-1
643	240	3	2008	GE	-1	1	1	1	1	1	1	1	1	1	1	1	1	1	1	1	1	1	1	3	1	-1	-1	-1	1
644	508	2	2008	GE	-1	2	1	1	1	1	1	1	1	1	1	1	1	1	1	3	1	1	3	1	1	-1	-1	-1	-1
645	254	3	2008	GE	-1	1	1	1	1	1	1	1	1	3	1	1	1	1	3	3	2	1	3	3	1	-1	-1	-1	1
646	247	3	2008	GE	-1	1	1	1	1	1	1	1	1	1	1	1	1	1	1	1	1	1	1	1	1	-1	-1	-1	1
647	840	1	2008	GE	-1	1	1	1	1	1	1	1	1	1	1	1	1	1	1	1	1	-1	1	1	1	-1	-1	-1	-1
648	228	2	2008	GE	-1	1	1	1	1	1	1	1	1	2	1	1	1	2	3	3	2	1	3	3	1	-1	-1	-1	-1
649	841	1	2008	GE	-1	1	1	2	1	1	1	1	1	3	1	1	3	2	3	3	2	-1	3	1	1	-1	-1	-1	-1
650	842	1	2008	GE	-1	1	1	1	1	1	1	1	1	1	1	1	1	1	1	1	1	1	1	1	1	-1	-1	-1	-1
651	771	2	2008	GE	-1	1	1	1	1	1	1	1	1	1	1	1	1	1	3	3	2	-1	3	3	1	-1	-1	-1	1
652	251	3	2008	GE	-1	3	1	1	1	1	1	1	1	3	1	1	1	1	3	3	2	1	3	1	1	-1	-1	-1	1
653	245	2	2008	GE	-1	1	1	1	1	1	1	1	1	1	1	1	1	1	3	1	2	1	3	1	1	-1	-1	-1	1
654	843	1	2008	GE	-1	1	1	1	1	1	1	1	1	1	2	2	2	2	1	2	1	1	1	1	1	-1	-1	-1	-1
655	231	3	2008	GE	-1	1	1	1	1	1	1	1	1	1	1	3	1	2	3	3	2	1	3	3	1	-1	-1	-1	-1
656	238	3	2008	GE	-1	1	1	2	1	1	2	1	1	3	1	1	1	1	3	3	2	-1	3	1	1	-1	-1	-1	1
657	844	1	2008	GE	-1	1	1	2	1	1	1	1	1	1	2	1	3	3	3	3	2	-1	3	3	1	-1	-1	-1	-1
658	598	2	2008	ES	-1	1	1	1	1	1	1	1	1	1	1	1	1	1	1	1	1	1	1	1	1	-1	-1	-1	-1
659	845	1	2008	ES	-1	1	1	1	1	1	1	1	1	1	1	1	1	1	1	1	1	1	1	1	1	-1	-1	-1	-1
660	600	2	2008	ES	-1	1	1	1	1	1	1	1	1	1	1	1	1	1	1	1	1	1	1	1	1	-1	-1	-1	-1
661	597	2	2008	ES	-1	1	1	1	1	1	1	1	1	1	1	3	1	1	1	1	1	1	1	1	1	-1	-1	-1	-1
662	599	2	2008	ES	-1	1	1	1	1	1	1	1	1	1	1	1	1	1	1	1	1	1	1	1	1	-1	-1	-1	-1
663	846	1	2008	ES	-1	1	1	1	1	1	1	1	1	1	1	1	1	1	1	1	1	1	1	1	1	-1	-1	-1	-1
664	601	2	2008	ES	-1	1	1	1	1	1	1	1	1	1	2	2	1	2	3	3	2	1	1	1	1	-1	-1	-1	-1
665	135	3	2008	ES	-1	1	1	2	1	1	1	1	1	1	1	1	1	1	3	1	1	1	1	2	1	-1	-1	-1	-1
666	105	2	2008	ES	-1	1	1	1	1	1	1	1	1	3	3	3	3	3	3	3	3	1	3	1	1	-1	-1	-1	-1
667	128	3	2008	ES	-1	1	1	1	1	1	1	1	1	1	1	1	1	1	1	1	2	1	1	1	1	-1	-1	-1	-1
668	585	2	2008	ES	-1	1	1	1	1	1	1	1	1	1	1	1	1	1	1	1	2	1	1	1	1	-1	-1	-1	-1
669	136	3	2008	ES	-1	1	1	1	1	1	1	1	1	3	1	1	1	1	3	3	2	1	1	1	1	-1	-1	-1	-1
670	134	2	2008	ES	-1	1	1	1	1	1	1	1	1	1	1	1	1	1	1	1	1	1	1	1	1	-1	-1	-1	-1
671	847	1	2008	ES	-1	1	1	1	1	1	1	1	1	1	1	1	1	1	1	1	1	1	1	1	1	-1	-1	-1	-1
672	848	1	2008	ES	-1	1	1	1	1	1	1	1	1	1	1	1	1	1	3	1	2	1	1	3	1	-1	-1	-1	-1
673	605	2	2008	ES	-1	1	1	1	1	1	1	1	1	1	1	1	1	1	3	1	2	1	1	1	1	-1	-1	-1	-1
674	104	2	2008	ES	-1	1	1	1	1	1	1	1	1	1	1	1	1	1	3	1	1	1	1	1	1	-1	-1	-1	-1
675	103	2	2008	ES	-1	1	1	1	1	1	1	1	1	1	1	1	1	1	3	1	2	1	1	1	1	-1	-1	-1	-1
676	619	2	2008	ES	-1	1	1	1	1	1	1	1	1	3	1	1	1	1	3	3	2	3	1	1	1	-1	-1	-1	-1
677	102	3	2008	ES	-1	1	1	1	1	1	1	1	1	1	1	1	1	1	3	1	1	3	1	1	1	-1	-1	-1	-1
678	618	2	2008	ES	-1	1	1	1	1	1	1	1	1	1	1	1	1	1	3	1	2	1	1	1	1	-1	-1	-1	-1
679	100	2	2008	ES	-1	1	1	1	1	1	1	1	1	1	1	1	1	1	3	3	2	3	1	1	1	-1	-1	-1	-1
680	111	3	2008	ES	-1	1	1	1	1	1	1	1	1	1	1	1	1	1	1	1	1	1	1	1	1	-1	-1	-1	-1
681	114	2	2008	ES	-1	1	1	1	1	1	1	1	1	1	1	1	1	1	3	1	2	1	1	1	1	-1	-1	-1	-1
682	148	2	2008	ES	-1	1	1	1	1	1	1	1	1	1	1	1	1	1	1	1	1	1	1	1	1	-1	-1	-1	-1
683	125	3	2008	ES	-1	1	1	1	1	1	1	1	1	1	1	1	1	1	1	1	1	1	1	1	1	-1	-1	-1	-1
684	109	2	2008	ES	-1	1	1	1	1	1	1	1	1	1	1	1	1	1	1	1	1	1	1	1	1	-1	-1	-1	-1
685	110	3	2008	ES	-1	1	1	1	1	1	1	1	1	1	1	1	1	1	1	1	1	1	1	1	1	-1	-1	-1	-1
686	106	3	2008	ES	-1	1	1	1	1	1	1	1	1	1	1	1	1	1	1	1	1	1	1	1	1	-1	-1	-1	-1
687	108	2	2008	ES	-1	1	1	1	1	1	1	1	1	3	1	1	1	1	3	3	1	1	1	1	1	-1	-1	-1	-1
688	107	2	2008	ES	-1	1	1	1	1	1	1	1	1	1	1	1	1	1	1	1	1	1	1	1	1	-1	-1	-1	-1
689	849	1	2008	ES	-1	1	1	1	1	1	1	1	1	1	1	1	1	1	1	1	1	1	1	1	1	-1	-1	-1	-1
690	612	2	2008	ES	-1	1	1	1	1	1	1	1	1	1	1	1	1	1	1	1	3	1	1	1	1	-1	-1	-1	-1
691	146	3	2008	ES	-1	1	1	1	1	1	1	1	1	1	1	1	1	1	1	1	1	1	1	1	1	-1	-1	-1	-1
692	144	3	2008	ES	-1	1	1	1	1	1	1	1	1	1	1	1	1	1	1	1	1	1	1	1	1	-1	-1	-1	-1
693	142	3	2008	ES	-1	1	1	1	1	1	1	1	1	1	1	1	1	1	1	1	1	1	1	1	1	-1	-1	-1	-1
694	145	3	2008	ES	-1	1	1	1	1	1	1	1	1	1	1	1	1	1	1	1	1	1	1	1	1	-1	-1	-1	-1
695	141	3	2008	ES	-1	1	1	1	1	1	1	1	1	1	1	1	1	1	3	3	2	3	1	1	1	-1	-1	-1	-1
696	122	3	2008	ES	-1	1	1	1	1	1	1	1	1	1	1	1	1	1	3	1	2	3	1	1	1	-1	-1	-1	-1
697	850	1	2008	ES	-1	1	1	1	1	1	1	1	1	1	1	1	1	1	1	1	1	1	1	1	1	-1	-1	-1	-1
698	119	3	2008	ES	-1	1	1	1	1	1	1	1	1	1	1	1	1	1	3	1	2	1	1	1	1	-1	-1	-1	-1
699	112	3	2008	ES	-1	1	1	1	1	1	1	1	1	1	1	1	1	1	1	1	1	1	1	1	1	-1	-1	-1	-1
700	117	3	2008	ES	-1	1	1	1	1	1	1	1	1	1	1	1	1	1	1	1	1	1	1	1	1	-1	-1	-1	-1
701	116	2	2008	ES	-1	1	1	1	1	1	1	1	1	1	1	1	1	1	3	1	2	1	1	1	1	-1	-1	-1	-1
702	851	1	2008	ES	-1	1	1	1	1	1	1	1	1	1	1	1	1	1	3	1	2	1	1	3	1	-1	-1	-1	-1
703	169	3	2008	ES	-1	1	1	1	1	1	1	1	1	1	1	1	1	1	3	1	2	1	1	1	1	-1	-1	-1	-1
704	852	1	2008	ES	-1	1	1	1	1	1	1	1	1	1	1	1	1	1	1	1	1	1	1	1	1	-1	-1	-1	-1
705	853	1	2008	ES	-1	1	1	1	1	1	1	1	1	1	1	1	1	1	1	1	1	1	1	1	1	-1	-1	-1	1
706	170	3	2008	ES	-1	1	1	1	1	1	1	1	1	1	1	1	1	1	1	1	1	1	1	1	1	-1	-1	-1	-1
707	158	3	2008	ES	-1	1	1	1	1	1	1	1	1	1	1	1	1	1	1	1	1	1	1	1	1	-1	-1	-1	-1
708	854	1	2008	ES	-1	1	1	1	1	1	1	1	1	1	1	1	1	1	1	1	1	1	1	1	1	-1	-1	-1	1
709	557	2	2008	ES	-1	1	1	1	1	1	1	1	1	1	1	1	1	1	1	1	1	1	1	1	1	-1	-1	-1	-1
710	855	1	2008	ES	-1	1	1	1	1	1	1	1	1	1	1	1	2	2	1	3	1	1	1	1	1	-1	-1	-1	-1
711	163	3	2008	ES	-1	1	1	1	1	1	1	1	1	1	1	1	1	1	1	1	1	1	1	1	1	-1	-1	-1	-1
712	165	3	2008	ES	-1	1	1	1	1	1	1	1	1	1	1	1	1	1	1	1	1	1	1	1	1	-1	-1	-1	-1
713	579	2	2008	ES	-1	1	1	1	1	1	1	1	1	1	1	1	1	1	1	1	1	1	1	1	1	-1	-1	-1	-1
714	166	3	2008	ES	-1	1	1	1	1	1	1	1	1	1	1	1	1	1	3	1	2	1	1	1	1	-1	-1	-1	-1
715	856	1	2008	ES	-1	1	1	1	1	1	1	1	1	1	1	1	1	1	1	1	1	1	1	1	1	-1	-1	-1	-1
716	154	3	2008	ES	-1	1	1	1	1	1	1	1	1	1	1	1	1	1	1	1	1	1	1	1	1	-1	-1	-1	-1
717	152	3	2008	ES	-1	1	1	1	1	1	1	1	1	1	1	1	1	1	1	1	1	1	1	1	1	-1	-1	-1	-1
718	857	1	2008	ES	-1	1	1	1	1	1	1	1	1	1	1	1	1	1	1	1	1	1	1	1	1	-1	-1	-1	-1
719	150	3	2008	ES	-1	1	1	1	1	1	1	1	1	1	1	1	1	3	1	3	1	1	1	1	1	-1	-1	-1	-1
720	151	3	2008	ES	-1	1	1	1	1	1	1	1	1	1	1	1	1	1	3	3	2	3	3	3	1	-1	-1	-1	-1
721	153	2	2008	ES	-1	1	1	1	1	1	1	1	1	1	1	1	1	1	1	1	1	1	1	1	1	-1	-1	-1	-1
722	173	2	2008	ES	-1	1	1	1	1	1	1	1	1	1	1	1	1	1	1	3	1	1	1	1	1	-1	-1	-1	-1
723	175	3	2008	ES	-1	1	1	1	1	1	1	1	1	1	1	1	1	1	1	1	1	1	1	1	1	-1	-1	-1	-1
724	174	3	2008	ES	-1	1	1	1	1	1	1	1	1	1	1	1	1	1	3	3	2	1	1	1	1	-1	-1	-1	-1
725	162	3	2008	ES	-1	1	1	1	1	1	1	1	1	1	1	1	1	1	3	3	1	1	1	3	1	-1	-1	-1	-1
726	176	3	2008	ES	-1	1	1	1	1	1	1	1	1	1	1	1	1	1	1	3	1	1	1	1	1	-1	-1	-1	-1
727	178	3	2008	ES	-1	1	1	1	1	1	1	1	1	1	1	1	1	1	1	1	1	1	1	1	1	-1	-1	-1	-1
728	573	2	2008	ES	-1	1	1	1	1	1	1	1	1	1	1	1	1	1	1	1	1	1	1	1	1	-1	-1	-1	-1
729	160	2	2008	ES	-1	1	1	1	1	1	1	1	1	1	1	1	1	1	3	1	2	1	3	1	1	-1	-1	-1	-1
730	568	2	2008	ES	-1	1	1	1	1	1	1	1	1	1	1	1	1	1	3	1	2	1	1	1	1	-1	-1	-1	-1
731	578	2	2008	ES	-1	1	1	1	1	1	1	1	1	1	1	1	1	1	3	1	2	3	1	1	1	-1	-1	-1	-1
732	574	2	2008	ES	-1	1	1	1	1	1	1	1	1	1	1	1	1	1	3	1	2	3	1	3	1	-1	-1	-1	-1
733	168	3	2008	ES	-1	1	1	1	1	1	1	1	1	1	2	2	1	3	3	3	2	3	3	3	1	-1	-1	-1	-1
734	859	1	2008	ES	-1	1	1	1	1	1	1	1	1	1	1	1	1	1	3	1	1	1	1	1	1	-1	-1	-1	-1
735	179	3	2008	ES	-1	1	1	2	1	1	1	1	1	1	1	1	1	1	1	3	2	1	1	3	1	-1	-1	-1	1
736	171	3	2008	ES	-1	1	1	1	1	1	1	1	1	1	1	1	1	1	3	3	1	1	1	1	1	-1	-1	-1	-1
737	860	1	2008	ES	-1	1	1	2	1	1	1	1	1	1	1	1	1	1	3	1	2	1	1	1	1	-1	-1	-1	-1
738	861	1	2008	ES	-1	1	1	1	1	1	1	1	1	1	1	1	1	1	3	1	2	1	1	1	1	-1	-1	-1	-1
739	862	1	2008	ES	-1	1	1	2	1	1	1	1	1	1	1	1	1	1	3	1	2	1	1	1	1	-1	-1	-1	-1
740	863	1	2008	ES	-1	1	1	2	1	1	1	1	1	1	1	1	1	1	3	3	2	1	3	1	1	-1	-1	-1	-1
741	864	1	2008	ES	-1	1	1	1	1	1	1	1	1	1	1	1	1	1	3	3	2	1	1	1	1	-1	-1	-1	-1
742	865	1	2008	ES	-1	1	1	1	1	1	1	1	1	1	1	1	1	3	3	3	2	1	1	1	1	-1	-1	-1	-1
743	866	1	2008	ES	-1	1	1	1	1	1	1	1	1	1	1	1	1	1	1	1	1	1	1	1	1	-1	-1	-1	-1
744	867	1	2008	ES	-1	1	1	1	1	1	1	1	1	1	1	1	1	1	3	3	2	3	1	1	1	-1	-1	-1	-1
745	868	1	2008	ES	-1	1	1	1	1	1	1	1	1	1	1	1	1	1	1	1	1	1	1	1	1	-1	-1	-1	-1
746	869	1	2008	ES	-1	1	1	1	1	1	1	1	1	1	1	1	1	1	1	1	1	1	1	1	1	-1	-1	-1	-1
747	870	1	2008	ES	-1	1	1	1	1	1	1	1	1	1	1	1	1	1	1	1	1	1	1	1	1	-1	-1	-1	-1
748	199	3	2008	ES	-1	1	1	1	1	1	1	1	1	1	1	1	1	1	1	1	1	1	1	1	1	-1	-1	-1	-1
749	871	1	2008	ES	-1	1	1	1	1	1	1	1	1	1	1	1	1	1	3	3	1	1	1	1	1	-1	-1	-1	1
750	872	1	2008	ES	-1	1	1	1	1	1	1	1	1	1	1	1	1	1	1	3	2	1	1	1	1	-1	-1	-1	-1
751	873	1	2008	ES	-1	1	1	1	1	1	1	1	1	1	1	1	1	1	3	3	2	1	1	1	1	-1	-1	-1	-1
752	189	2	2008	ES	-1	1	1	1	1	1	1	1	1	1	1	1	1	1	1	1	1	1	1	1	1	-1	-1	-1	-1
753	192	3	2008	ES	-1	1	1	1	1	1	1	1	1	1	1	1	1	1	1	1	1	1	1	1	1	-1	-1	-1	-1
754	874	1	2008	ES	-1	1	1	1	1	1	1	1	1	1	1	1	1	1	3	3	2	1	1	1	1	-1	-1	-1	-1
755	191	2	2008	ES	-1	1	1	1	1	1	1	1	1	1	1	1	1	1	3	3	2	1	1	1	1	-1	-1	-1	-1
756	185	2	2008	ES	-1	1	1	1	1	1	1	1	1	1	1	1	1	1	1	3	2	1	3	1	1	-1	-1	-1	-1
757	193	2	2008	ES	-1	1	1	1	1	1	1	1	1	1	1	1	1	1	1	1	1	1	1	1	1	-1	-1	-1	-1
758	875	1	2008	PT	-1	1	1	2	1	1	1	1	1	1	2	1	1	1	1	1	2	1	1	1	1	-1	-1	-1	-1
759	876	1	2008	PT	-1	1	1	2	1	1	1	1	1	1	1	1	1	1	1	1	2	1	1	1	1	-1	-1	-1	-1
760	877	1	2008	PT	-1	2	1	2	1	1	1	1	1	1	2	1	1	1	1	1	2	1	1	1	1	-1	-1	-1	-1
761	878	1	2008	PT	-1	1	1	1	1	1	1	1	1	1	2	1	1	1	1	1	2	1	1	1	1	-1	-1	-1	-1
762	879	1	2008	PT	-1	1	1	2	1	1	1	1	1	1	2	1	1	1	1	1	1	1	1	1	1	-1	-1	-1	1
763	880	1	2008	PT	-1	2	1	2	1	1	1	1	1	1	1	1	1	1	1	1	2	1	1	1	1	-1	-1	-1	1
764	881	1	2008	PT	-1	1	1	2	1	1	1	1	1	1	1	1	1	1	1	1	2	1	1	1	1	-1	-1	-1	1
765	882	1	2008	PT	-1	2	1	2	1	1	1	1	1	1	1	1	1	1	1	1	2	1	1	1	1	-1	-1	-1	1
766	883	1	2008	PT	-1	1	1	2	1	1	1	1	1	1	1	1	1	1	1	1	3	1	2	3	1	-1	-1	-1	-1
767	884	1	2008	PT	-1	1	1	2	1	1	1	1	1	1	1	1	1	1	1	1	2	1	3	3	1	-1	-1	-1	-1
768	885	1	2008	PT	-1	1	1	2	1	1	1	1	1	1	1	1	1	1	1	1	1	1	3	3	1	-1	-1	-1	-1
769	886	1	2008	PT	-1	1	1	2	1	1	1	1	1	1	1	1	1	1	1	1	2	1	3	3	1	-1	-1	-1	-1
770	887	1	2008	PT	-1	1	1	2	1	1	1	1	1	1	1	1	1	1	1	1	3	1	3	3	1	-1	-1	-1	-1
771	888	1	2008	PT	-1	1	1	2	1	1	1	1	1	1	1	1	1	1	1	1	1	1	1	3	1	-1	-1	-1	-1
772	889	1	2008	PT	-1	1	1	2	1	1	1	1	1	1	1	1	1	1	1	1	2	1	1	3	1	-1	-1	-1	-1
773	890	1	2008	PT	-1	1	1	2	1	1	1	1	1	1	1	1	1	1	1	1	2	1	1	3	1	-1	-1	-1	-1
774	891	1	2008	PT	-1	1	1	2	1	1	1	1	1	1	1	1	1	1	1	1	2	1	1	3	1	-1	-1	-1	-1
775	892	1	2008	PT	-1	1	1	2	1	1	1	1	1	1	1	1	1	1	1	1	2	1	1	3	1	-1	-1	-1	-1
776	893	1	2008	PT	-1	1	1	2	1	1	1	1	1	1	1	1	1	1	1	1	2	1	1	3	1	-1	-1	-1	-1
777	894	1	2008	PT	-1	1	1	2	1	1	1	1	1	1	1	1	1	1	1	1	1	1	1	3	1	-1	-1	-1	-1
778	895	1	2008	PT	-1	1	1	2	1	1	1	1	1	1	1	1	1	1	1	1	2	1	1	3	1	-1	-1	-1	-1
779	896	1	2008	PT	-1	1	1	1	1	1	1	1	1	1	1	1	1	1	1	1	1	1	1	1	1	-1	-1	-1	1
780	897	1	2008	PT	-1	1	1	1	1	1	1	1	1	1	2	1	1	1	1	1	2	1	1	3	1	-1	-1	-1	-1
781	898	1	2008	PT	-1	1	1	1	1	1	1	1	1	1	1	1	1	1	1	1	1	1	1	1	1	-1	-1	-1	-1
782	899	1	2008	PT	-1	1	1	1	1	1	1	1	1	1	2	1	1	1	1	1	1	1	1	3	1	-1	-1	-1	-1
783	900	1	2008	PT	-1	1	1	2	1	1	1	1	1	1	1	1	1	1	1	1	2	1	1	1	1	-1	-1	-1	-1
784	901	1	2008	PT	-1	1	1	1	1	1	1	1	1	1	2	1	1	1	1	1	2	1	3	1	1	-1	-1	-1	-1
785	902	1	2008	PT	-1	1	1	2	1	1	1	1	1	1	1	1	1	1	1	1	1	1	1	3	1	-1	-1	-1	-1
786	903	1	2008	PT	-1	1	1	2	1	1	1	1	1	1	1	1	1	1	1	1	2	1	3	1	1	-1	-1	-1	-1
787	904	1	2008	PT	-1	1	1	2	1	1	1	1	1	1	2	1	1	1	1	1	3	1	1	3	1	-1	-1	-1	-1
788	905	1	2008	PT	-1	1	1	2	1	1	1	1	1	1	2	1	1	1	1	1	1	1	1	1	1	-1	-1	-1	-1
789	906	1	2008	PT	-1	1	1	2	1	1	1	1	1	1	1	1	1	1	1	1	2	1	1	1	1	-1	-1	-1	-1
790	907	1	2008	PT	-1	1	1	2	1	1	1	1	1	1	2	1	1	1	1	1	2	1	3	3	1	-1	-1	-1	1
791	908	1	2008	PT	-1	1	1	2	1	1	1	1	1	1	2	1	1	1	1	1	1	1	3	3	1	-1	-1	-1	-1
792	909	1	2008	PT	-1	1	1	2	1	1	1	1	1	1	2	1	1	1	1	1	2	1	3	1	1	-1	-1	-1	-1
793	910	1	2008	PT	-1	1	1	2	1	1	1	1	1	1	1	1	1	1	1	1	2	1	3	3	1	-1	-1	-1	1
794	911	1	2008	PT	-1	1	1	2	1	1	1	1	1	1	2	1	1	1	1	1	2	1	3	3	1	-1	-1	-1	1
795	912	1	2008	PT	-1	1	1	2	1	1	1	1	1	1	2	1	1	1	1	1	2	1	3	3	1	-1	-1	-1	1
796	913	1	2008	PT	-1	1	1	2	1	1	1	1	1	1	1	1	1	1	1	1	3	1	3	1	1	-1	-1	-1	1
797	914	1	2008	PT	-1	1	1	2	1	1	1	1	1	1	2	1	1	1	1	1	1	1	3	1	1	-1	-1	-1	1
798	915	1	2008	RO	-1	1	1	1	1	1	-1	1	1	1	1	2	1	1	3	-1	2	3	3	3	3	-1	-1	-1	-1
799	916	1	2008	RO	-1	1	1	1	1	1	-1	1	1	1	1	1	1	1	3	-1	2	3	3	1	1	-1	-1	-1	-1
800	917	1	2008	RO	-1	1	1	1	1	1	-1	1	1	3	1	1	1	1	3	-1	2	-1	3	1	1	-1	-1	-1	-1
801	918	1	2008	RO	-1	1	1	1	1	1	-1	1	1	3	1	1	1	1	3	-1	2	-1	3	1	1	-1	-1	-1	-1
802	919	1	2008	RO	-1	1	1	1	1	1	-1	1	1	1	1	1	1	1	3	-1	2	-1	3	1	1	-1	-1	-1	-1
803	920	1	2008	RO	-1	1	1	1	1	1	-1	1	1	1	1	1	1	1	1	-1	2	-1	3	3	1	-1	-1	-1	-1
804	921	1	2008	RO	-1	1	1	1	1	1	-1	1	1	1	2	2	1	2	3	-1	2	-1	1	1	1	-1	-1	-1	1
805	922	1	2008	RO	-1	1	1	1	1	1	-1	1	1	3	1	1	1	1	1	-1	2	-1	3	3	1	-1	-1	-1	-1
806	923	1	2008	RO	-1	1	1	1	1	1	-1	1	1	1	3	1	1	1	2	-1	1	-1	1	1	1	-1	-1	-1	-1
807	924	1	2008	RO	-1	1	1	1	1	1	-1	1	1	3	1	1	2	2	3	-1	3	3	3	1	1	-1	-1	-1	-1
808	715	2	2008	RO	-1	1	1	1	1	1	-1	1	1	1	2	2	1	2	3	-1	2	3	1	1	1	-1	-1	-1	-1
809	925	1	2008	RO	-1	1	1	1	1	1	-1	1	1	1	1	1	1	1	1	-1	1	-1	1	1	1	-1	-1	-1	-1
810	926	1	2008	RO	-1	1	1	1	1	1	-1	1	1	1	1	1	1	1	1	-1	1	-1	1	1	1	-1	-1	-1	-1
811	927	1	2008	RO	-1	1	1	1	1	1	-1	1	1	2	1	1	1	1	1	-1	1	-1	1	1	1	-1	-1	-1	-1
812	928	1	2008	RO	-1	1	1	1	1	1	-1	1	1	1	1	1	1	1	1	-1	1	1	1	1	1	-1	-1	-1	1
813	929	1	2008	RO	-1	1	1	1	1	1	-1	1	1	1	1	1	1	1	1	-1	1	1	1	1	1	-1	-1	-1	-1
814	930	1	2008	RO	-1	1	1	1	1	1	-1	1	1	1	1	1	1	1	1	-1	3	3	3	3	1	-1	-1	-1	-1
815	931	1	2008	RO	-1	1	1	1	1	1	-1	1	1	1	1	1	1	1	3	-1	2	-1	3	3	1	-1	-1	-1	1
816	932	1	2008	RO	-1	1	1	1	1	1	-1	1	1	1	1	1	1	1	3	-1	2	-1	3	3	1	-1	-1	-1	-1
817	933	1	2008	RO	-1	1	1	1	1	1	-1	1	1	1	1	1	1	1	3	-1	2	-1	3	1	1	-1	-1	-1	-1
818	934	1	2008	RO	-1	1	1	1	1	1	-1	1	1	1	1	1	1	1	3	-1	2	-1	3	3	1	-1	-1	-1	1
819	718	2	2008	RO	-1	3	1	2	1	1	-1	1	1	3	1	1	1	1	3	-1	2	-1	3	3	1	-1	-1	-1	-1
820	935	1	2008	RO	-1	3	1	1	1	1	-1	1	1	1	1	1	1	2	3	-1	2	3	3	3	1	-1	-1	-1	-1
821	936	1	2008	RO	-1	1	1	1	1	1	-1	1	1	1	2	2	1	2	3	-1	2	3	1	1	1	-1	-1	-1	-1
822	937	1	2008	RO	-1	1	1	1	1	1	-1	1	1	1	2	2	1	1	3	-1	2	-1	1	3	1	-1	-1	-1	-1
823	938	1	2008	RO	-1	1	1	1	1	1	-1	1	1	2	2	1	1	1	1	-1	1	-1	3	1	1	-1	-1	-1	-1
824	939	1	2008	RO	-1	1	1	1	1	1	-1	1	1	1	1	1	2	2	1	-1	1	3	1	1	3	-1	-1	-1	-1
825	940	1	2008	RO	-1	1	1	1	1	1	-1	1	1	1	2	2	2	2	1	-1	2	-1	3	1	3	-1	-1	-1	-1
826	941	1	2008	RO	-1	1	1	1	1	1	-1	1	1	3	2	2	1	1	3	-1	2	-1	3	2	1	-1	-1	-1	-1
827	942	1	2008	RO	-1	2	1	1	1	1	-1	1	1	1	1	1	1	1	3	-1	2	-1	3	3	1	-1	-1	-1	-1
828	943	1	2008	RO	-1	1	1	1	1	1	-1	1	1	1	1	1	1	1	1	-1	1	-1	1	1	1	-1	-1	-1	1
829	944	1	2008	RO	-1	1	1	1	1	1	-1	1	1	1	2	1	1	1	1	-1	2	-1	2	1	1	-1	-1	-1	-1
830	945	1	2008	RO	-1	1	1	1	1	1	-1	1	1	3	1	1	1	1	3	-1	2	-1	1	1	3	-1	-1	-1	-1
831	946	1	2008	RO	-1	1	1	1	1	1	-1	1	1	1	1	1	1	1	1	-1	3	3	3	1	1	-1	-1	-1	1
832	947	1	2008	RO	-1	3	1	1	1	1	-1	1	1	3	1	1	1	1	1	-1	1	-1	3	3	1	-1	-1	-1	-1
833	948	1	2008	RO	-1	1	1	1	1	1	-1	1	1	1	1	1	1	1	3	-1	2	-1	3	1	1	-1	-1	-1	-1
834	949	1	2008	RO	-1	3	1	1	1	1	-1	1	1	2	1	1	1	1	-1	-1	2	-1	1	1	1	-1	-1	-1	-1
835	950	1	2008	RO	-1	1	1	1	1	1	-1	1	1	3	1	1	1	1	-1	-1	1	-1	3	1	1	-1	-1	-1	-1
836	951	1	2008	RO	-1	1	1	1	1	1	-1	1	1	1	2	2	1	2	3	-1	2	-1	3	1	1	-1	-1	-1	-1
837	952	1	2008	RO	-1	1	1	1	1	1	-1	1	1	1	1	1	1	1	3	-1	1	1	1	1	1	-1	-1	-1	-1
838	2163	1	2008	RO	-1	1	1	1	1	1	-1	1	1	1	1	1	1	1	1	-1	1	1	1	1	1	-1	-1	-1	1
839	2164	1	2008	RO	-1	1	1	1	1	1	-1	1	1	1	1	1	1	1	1	-1	1	1	1	1	1	-1	-1	-1	1
840	2165	1	2008	RO	-1	1	1	1	1	1	-1	1	1	1	1	1	1	1	1	-1	1	1	1	1	1	-1	-1	-1	1
841	953	1	2009	RO	1	3	1	1	1	1	1	1	1	3	1	1	1	1	3	1	1	-1	1	1	1	1	1	1	-1
842	954	1	2009	RO	1	1	1	1	1	1	1	1	1	1	2	2	2	2	3	1	2	-1	3	1	3	1	1	1	-1
843	955	1	2009	RO	1	1	1	1	1	1	1	1	1	1	2	1	1	1	1	1	2	-1	1	1	1	1	1	1	-1
844	956	1	2009	RO	1	1	1	1	1	1	1	1	1	1	1	1	1	1	1	1	1	-1	1	1	1	1	1	1	-1
845	957	1	2009	RO	1	1	1	1	1	1	1	1	1	2	1	1	2	2	3	2	1	-1	3	3	1	1	1	1	-1
846	958	1	2009	RO	1	1	1	1	1	1	1	1	1	1	1	1	2	2	1	1	2	3	1	1	1	1	1	1	-1
847	934	2	2009	RO	1	1	1	1	1	1	1	1	1	1	1	1	1	1	3	1	2	-1	1	1	1	1	1	1	-1
848	959	1	2009	RO	1	1	1	1	1	1	1	1	1	1	1	1	1	2	1	2	2	-1	1	1	1	1	1	1	-1
849	933	2	2009	RO	1	1	1	1	1	1	1	1	1	1	1	1	2	2	1	1	2	-1	1	1	1	1	1	1	-1
850	960	1	2009	RO	1	1	1	1	1	1	1	1	1	1	1	1	2	2	1	1	2	-1	1	1	1	1	1	1	-1
851	931	2	2009	RO	1	1	1	1	1	1	1	1	1	1	1	1	1	2	1	1	2	-1	1	1	1	1	1	1	-1
852	961	1	2009	RO	1	1	1	1	1	1	1	1	1	1	1	1	1	1	1	1	1	1	1	1	1	1	1	1	-1
853	962	1	2009	RO	1	1	1	1	1	1	1	1	1	1	1	1	1	1	3	1	2	3	3	3	3	3	1	4	-1
854	963	1	2009	RO	1	1	1	1	1	1	1	1	1	1	1	1	1	1	3	1	1	1	1	1	1	1	1	1	-1
855	964	1	2009	RO	1	1	1	1	1	1	1	1	1	1	1	1	1	1	3	1	1	3	3	3	3	3	3	4	1
856	965	1	2009	RO	1	1	1	1	1	1	1	1	1	1	1	1	1	1	1	1	1	1	1	1	1	1	1	1	3
857	966	1	2009	RO	1	1	1	1	1	1	1	1	1	3	1	1	1	2	3	2	2	1	3	3	1	1	1	1	-1
858	917	2	2009	RO	2	1	1	1	1	1	1	1	1	3	1	1	1	1	3	1	2	-1	3	1	1	1	1	2	-1
859	967	1	2009	RO	1	2	1	1	1	1	1	1	1	1	2	2	1	1	3	1	2	-1	3	1	1	1	1	1	-1
860	968	1	2009	RO	1	1	1	1	1	1	1	1	1	1	1	1	1	1	3	1	2	-1	3	1	1	1	1	1	-1
861	969	1	2009	RO	1	1	1	1	1	1	1	1	1	1	1	1	1	1	3	1	2	-1	1	1	1	1	1	1	-1
862	970	1	2009	RO	1	2	1	1	1	1	1	1	1	1	2	2	1	1	3	1	2	-1	3	1	1	1	1	1	-1
863	971	1	2009	RO	2	1	1	1	1	1	1	1	1	3	1	1	1	1	3	1	2	-1	3	1	1	1	1	2	-1
864	972	1	2009	RO	1	1	1	1	1	1	1	1	1	1	2	2	1	1	3	1	2	-1	3	1	1	1	1	1	-1
865	973	1	2009	RO	1	1	1	1	1	1	1	1	1	1	2	2	1	1	3	1	2	-1	1	1	1	1	1	1	-1
866	974	1	2009	RO	1	1	1	1	1	1	1	1	1	1	1	1	1	2	3	1	2	-1	1	1	1	1	1	4	3
867	975	1	2009	RO	1	2	1	1	1	1	1	1	1	1	2	2	1	1	3	1	2	-1	1	1	1	1	1	1	-1
868	976	1	2009	RO	1	2	1	1	1	1	1	1	1	1	1	1	1	1	3	1	2	-1	3	1	1	1	1	1	-1
869	977	1	2009	RO	1	2	1	1	1	1	1	1	1	1	1	1	1	1	3	1	2	-1	3	1	1	1	1	1	-1
870	978	1	2009	RO	1	1	1	1	1	1	1	1	1	1	1	1	1	1	3	1	2	-1	1	1	1	1	1	1	-1
871	979	1	2009	RO	1	1	1	1	1	1	1	1	1	1	1	1	1	1	1	1	1	1	1	1	1	1	1	1	1
872	980	1	2009	RO	1	1	1	1	1	1	1	1	1	1	1	1	1	1	1	1	2	1	1	1	1	1	1	1	-1
873	981	1	2009	RO	1	1	1	1	1	1	1	1	1	1	1	1	1	1	3	1	2	1	1	1	1	1	1	1	-1
874	715	3	2009	RO	1	1	1	1	1	1	1	1	1	1	1	1	1	1	3	1	2	1	1	1	1	1	1	1	-1
875	982	1	2009	RO	1	1	1	1	1	1	1	1	1	1	1	1	1	1	1	1	1	1	1	1	1	1	1	1	1
876	983	1	2009	RO	1	1	1	1	1	1	1	1	1	1	1	1	1	1	1	1	1	1	1	1	1	1	1	1	-1
877	984	1	2009	RO	1	1	1	1	1	1	1	1	1	1	1	1	1	1	1	1	1	1	1	1	1	1	1	1	-1
878	929	2	2009	RO	1	1	1	1	1	1	1	1	1	1	1	1	1	2	3	1	1	1	1	1	1	1	1	1	-1
879	985	1	2009	RO	1	1	1	1	1	1	1	1	1	1	1	1	1	2	3	2	2	1	1	1	1	1	1	1	-1
880	922	2	2009	RO	1	1	1	1	1	1	1	1	1	1	1	1	1	1	1	1	2	1	1	1	1	1	1	1	-1
881	318	4	2009	SK	1	1	1	1	1	1	1	1	1	1	1	1	1	1	3	1	2	3	1	1	-1	1	4	1	3
882	986	1	2009	SK	1	1	1	1	1	1	1	1	1	1	1	1	1	1	1	1	1	1	1	1	1	1	1	1	-1
883	738	3	2009	SK	1	1	1	1	1	1	1	1	1	3	1	1	1	3	3	3	2	-1	1	1	1	1	1	1	1
884	987	1	2009	RO	1	1	1	1	1	1	1	1	1	1	1	1	1	1	1	1	2	1	1	1	1	1	1	1	-1
885	988	1	2009	SK	1	1	1	2	1	1	1	1	1	2	1	1	1	1	1	1	1	-1	3	1	1	4	1	1	1
886	821	2	2009	SK	1	1	1	1	1	1	1	1	1	1	1	1	1	1	3	1	1	1	1	1	1	1	1	1	1
887	747	3	2009	CZ	1	1	1	1	1	1	1	1	1	3	1	1	1	1	3	3	2	1	3	1	1	1	1	1	2
888	798	2	2009	CZ	1	1	1	1	1	1	1	1	1	1	1	1	1	1	1	3	2	-1	3	1	1	1	1	1	1
889	345	4	2009	CZ	1	1	1	2	1	1	2	1	1	1	1	1	1	1	1	3	2	-1	3	1	1	1	1	1	1
890	350	4	2009	CZ	1	1	1	2	1	1	2	1	1	1	1	1	1	1	3	1	2	1	3	1	1	1	1	1	1
891	337	4	2009	CZ	1	1	1	1	1	1	1	1	1	1	1	1	1	1	1	2	3	1	1	1	1	1	1	1	3
892	782	3	2009	CZ	1	1	1	1	1	1	1	1	1	3	1	1	1	1	1	1	1	1	1	1	1	4	4	4	1
893	989	1	2009	CZ	1	1	1	1	1	1	1	1	1	1	1	1	1	1	1	1	1	1	1	1	1	1	1	1	1
894	799	2	2009	CZ	1	1	1	1	1	1	1	1	1	2	1	1	1	1	1	3	2	-1	1	1	1	1	1	1	3
895	990	1	2009	CZ	1	1	1	1	1	1	1	1	1	3	1	1	1	1	1	3	2	1	3	1	1	1	1	1	1
896	791	2	2009	CZ	1	1	1	1	1	1	1	1	1	1	1	1	1	1	1	1	1	-1	3	1	1	4	4	1	3
897	991	1	2009	CZ	1	1	1	1	1	1	1	1	1	3	1	1	1	1	1	3	2	1	3	1	1	4	4	4	1
898	805	2	2009	CZ	1	1	1	1	1	1	1	1	1	1	2	2	1	1	3	1	2	-1	1	1	3	1	1	1	3
899	746	3	2009	CZ	1	1	1	1	1	1	1	1	1	1	1	1	1	1	1	1	1	-1	1	1	1	1	1	1	1
900	806	2	2009	CZ	1	1	1	1	1	1	1	1	1	1	2	2	1	2	3	1	2	3	3	3	1	1	1	1	1
901	349	2	2009	CZ	1	1	1	2	1	1	2	1	1	1	-1	-1	-1	-1	-1	-1	-1	-1	3	-1	1	4	1	1	3
902	761	3	2009	CZ	1	1	1	1	1	1	1	1	1	2	1	1	1	1	1	1	1	1	1	1	1	1	1	1	1
903	750	3	2009	CZ	1	1	1	1	1	1	1	1	1	1	1	1	1	2	1	1	2	1	1	1	1	1	1	1	1
904	992	1	2009	CZ	1	1	1	2	1	1	2	1	1	1	1	1	1	1	-1	3	2	1	1	1	1	1	1	1	2
905	338	4	2009	CZ	1	1	1	1	1	1	1	1	1	3	2	2	1	1	3	3	2	1	3	1	1	1	1	1	-1
906	326	4	2009	CZ	1	1	1	1	1	1	1	1	1	3	2	2	3	3	3	3	2	1	3	3	1	2	4	3	2
907	752	3	2009	CZ	1	1	1	2	1	1	2	1	1	1	1	1	1	3	3	3	2	1	3	1	1	1	1	1	1
908	757	2	2009	CZ	1	1	1	2	1	1	2	1	1	1	1	1	1	1	3	1	1	3	3	2	1	1	1	1	1
909	993	1	2009	CZ	1	1	1	2	1	1	2	1	1	3	1	2	3	1	3	3	1	3	3	1	1	1	4	4	-1
910	994	1	2009	CZ	1	1	1	1	1	1	1	1	1	1	1	1	1	1	1	3	1	-1	1	1	1	1	1	1	-1
911	995	1	2009	CZ	1	1	1	1	1	1	1	1	1	1	1	1	1	1	3	3	2	-1	1	1	1	1	1	1	-1
912	996	1	2009	CZ	1	1	1	1	1	1	1	1	1	1	1	1	1	1	1	1	1	-1	1	1	1	4	1	1	-1
913	997	1	2009	CZ	1	1	1	2	1	1	2	1	1	1	1	1	1	1	1	3	2	-1	3	1	1	4	4	4	3
914	998	1	2009	CZ	1	1	1	2	1	1	2	1	1	1	1	1	1	1	1	1	1	1	1	1	1	1	1	1	-1
915	786	3	2009	CZ	1	1	1	2	1	1	2	1	1	1	3	3	1	1	3	3	2	3	3	1	1	1	1	1	1
916	331	4	2009	CZ	1	1	1	2	1	1	2	1	1	1	1	1	1	1	3	1	1	1	3	1	1	1	1	1	1
917	999	1	2009	CZ	1	2	1	1	1	1	1	1	1	1	1	1	1	1	1	1	2	1	1	1	1	1	1	1	-1
918	1000	1	2009	CZ	1	1	1	2	1	1	2	1	1	1	1	1	1	1	1	1	1	1	1	1	1	1	1	1	1
919	1001	1	2009	CZ	1	1	1	1	1	1	1	1	1	1	1	1	1	1	3	2	2	3	1	-1	1	1	1	1	3
920	1002	1	2009	CZ	1	1	1	1	1	1	1	1	1	1	1	1	1	1	3	1	2	-1	3	1	1	1	1	1	1
921	812	2	2009	CZ	1	1	1	1	1	2	1	2	1	1	2	1	1	1	1	1	2	1	3	1	1	1	1	1	3
922	1003	1	2009	CZ	1	1	1	1	1	1	1	1	1	3	1	1	1	1	3	3	2	1	3	1	1	1	1	1	2
923	813	2	2009	CZ	1	1	1	2	1	1	2	1	1	1	1	1	1	1	3	1	1	-1	3	1	1	1	1	1	1
924	751	3	2009	CZ	1	3	1	2	1	1	2	1	1	3	1	1	1	1	1	3	2	1	1	1	1	1	1	1	-1
925	1004	1	2009	CZ	1	1	1	1	1	1	1	1	1	1	1	1	1	1	1	1	1	1	1	1	1	4	1	1	1
926	1005	1	2009	CZ	1	1	1	1	1	1	1	1	1	1	1	1	1	1	1	1	1	1	1	2	1	1	1	1	1
927	1006	1	2009	CZ	1	1	1	2	1	1	2	1	1	1	1	1	1	1	1	1	1	1	3	2	1	1	1	1	3
928	1007	1	2009	CZ	1	2	1	1	1	1	1	1	1	3	2	2	1	1	1	1	2	-1	1	1	1	1	1	1	-1
929	1008	1	2009	CZ	1	1	1	1	1	1	1	1	1	1	1	1	1	1	1	1	1	-1	1	1	1	1	1	1	3
930	1009	1	2009	CZ	1	1	1	1	1	1	1	1	1	1	1	1	1	1	1	1	2	-1	1	1	1	1	1	1	1
931	807	2	2009	CZ	1	1	1	1	1	1	1	1	1	1	1	1	1	1	1	1	1	3	1	1	1	1	4	1	1
932	1010	1	2009	CZ	1	1	1	1	1	1	1	1	1	3	1	1	1	1	1	3	2	1	1	1	1	4	4	4	2
933	1011	1	2009	CZ	1	3	1	2	1	1	2	1	1	1	1	1	1	1	3	2	2	1	3	1	1	1	1	1	1
934	1012	1	2009	CZ	1	1	1	1	1	1	1	1	1	1	1	1	1	1	1	1	1	1	1	1	1	1	1	1	-1
935	773	3	2009	CZ	1	1	1	1	1	1	1	1	1	1	1	1	1	1	1	1	2	1	3	1	1	1	1	1	1
936	896	2	2009	PT	1	1	1	2	1	1	2	1	1	1	1	1	1	1	1	1	2	1	1	3	1	1	1	1	1
937	890	2	2009	PT	1	1	1	2	1	1	2	1	1	1	1	1	1	1	1	1	2	1	3	3	1	1	1	1	-1
938	891	2	2009	PT	1	1	1	1	1	1	1	1	1	1	1	1	1	1	1	1	2	1	1	3	1	1	1	1	-1
939	893	2	2009	PT	1	1	1	2	1	1	2	1	1	1	2	1	1	1	1	1	2	1	3	3	1	1	1	1	-1
940	894	2	2009	PT	1	1	1	2	1	1	2	1	1	1	1	1	1	1	1	1	2	1	1	3	1	1	1	1	-1
941	897	2	2009	PT	1	1	1	1	1	1	1	1	1	1	2	1	1	1	3	1	2	1	1	1	1	1	1	1	-1
942	895	2	2009	PT	1	1	-1	2	1	1	2	1	1	1	1	1	1	1	1	1	2	1	1	3	1	1	1	1	-1
943	889	2	2009	PT	1	1	1	2	1	1	2	1	1	1	1	1	1	1	1	1	2	1	1	3	1	1	1	1	-1
944	1013	1	2009	PT	1	1	1	1	1	1	1	1	1	1	1	1	1	1	1	3	2	1	3	3	1	1	1	1	-1
945	1014	1	2009	PT	1	1	1	1	1	1	1	1	1	1	2	1	1	1	1	1	2	1	3	3	1	1	1	1	-1
946	1015	1	2009	PT	1	1	1	1	1	1	1	1	1	1	1	1	1	1	1	1	2	1	1	1	1	1	1	1	-1
947	877	2	2009	PT	1	1	1	2	1	1	2	1	1	1	2	1	1	1	1	3	2	1	3	3	1	1	1	1	-1
948	878	2	2009	PT	1	1	1	2	1	1	2	1	1	1	2	1	1	1	1	1	2	1	3	1	1	1	1	1	-1
949	879	2	2009	PT	1	1	1	2	1	1	2	1	1	1	1	1	1	1	1	3	2	-1	3	3	1	1	1	1	1
950	1016	1	2009	PT	1	1	1	1	1	1	1	1	1	1	2	1	1	1	1	1	2	1	1	3	1	1	1	1	-1
951	1017	1	2009	PT	1	1	1	1	1	1	1	1	1	1	2	1	1	1	1	1	2	1	3	1	1	1	1	1	-1
952	1018	1	2009	PT	1	1	1	1	1	1	2	1	1	1	1	1	1	1	1	3	2	1	1	3	1	1	1	1	-1
953	1019	1	2009	PT	1	1	1	2	1	1	2	1	1	1	2	1	1	1	1	3	2	1	3	3	1	1	1	1	1
954	1020	1	2009	PT	1	1	1	1	1	1	1	1	1	1	2	1	1	1	1	3	1	1	1	1	1	1	1	1	1
955	884	2	2009	PT	1	1	1	2	1	1	2	1	1	1	1	1	1	1	1	1	2	-1	3	3	1	2	1	1	-1
956	886	2	2009	PT	1	1	1	2	1	1	2	1	1	1	1	1	1	1	1	1	2	1	3	3	1	1	1	1	-1
957	887	2	2009	PT	1	1	1	2	1	1	2	1	1	1	1	1	1	1	1	1	1	1	3	3	1	1	1	1	-1
958	903	2	2009	PT	1	1	1	2	1	1	2	1	1	1	1	1	1	1	1	1	2	-1	3	3	1	1	1	1	-1
959	905	2	2009	PT	1	1	1	1	1	1	2	1	1	1	1	1	1	1	1	1	2	1	3	3	1	1	1	1	-1
960	906	2	2009	PT	1	1	1	2	1	1	2	1	1	1	1	1	1	1	1	1	1	1	3	3	1	1	1	1	-1
961	1021	1	2009	PT	1	1	1	1	1	1	2	1	1	1	2	1	1	1	1	1	2	1	3	1	1	1	1	1	-1
962	1022	1	2009	PT	1	1	1	1	1	1	2	1	1	1	2	1	1	1	1	1	1	1	3	3	1	1	1	1	1
963	907	2	2009	PT	1	1	1	1	1	1	1	1	1	1	1	1	1	1	1	1	3	1	3	3	1	1	1	1	-1
964	1023	1	2009	PT	1	1	1	1	1	1	2	1	1	1	1	1	1	1	1	1	2	1	3	1	1	1	1	1	-1
965	909	2	2009	PT	1	1	1	1	1	1	2	1	1	1	2	1	1	1	1	1	2	1	3	1	1	1	1	1	-1
966	1024	1	2009	PT	1	1	1	1	1	1	2	1	1	1	2	1	1	1	1	1	1	1	3	1	1	1	1	1	-1
967	1025	1	2009	PT	1	1	1	1	1	1	2	1	1	1	1	1	1	1	1	1	1	1	3	3	1	1	1	1	1
968	1070	1	2009	PT	1	1	1	1	1	1	2	1	1	1	2	1	1	1	1	1	2	1	3	3	1	1	1	1	1
969	912	2	2009	PT	1	1	1	1	1	1	2	1	1	1	2	1	1	1	1	1	1	1	3	3	1	1	1	3	1
970	913	2	2009	PT	1	1	1	2	1	1	2	1	1	1	3	1	1	1	1	1	3	1	3	3	1	1	1	1	1
971	914	2	2009	PT	1	1	1	2	1	1	2	1	1	1	1	1	1	1	1	1	2	-1	3	3	1	1	1	1	1
972	910	2	2009	PT	1	1	1	2	1	1	2	1	1	1	2	1	1	1	1	1	2	1	3	3	1	1	1	1	1
973	911	2	2009	PT	1	1	1	1	1	1	2	1	1	1	1	1	1	1	1	1	2	1	3	3	1	1	1	1	1
974	1026	1	2009	PT	1	1	1	2	1	1	2	1	1	1	2	1	1	1	1	1	2	1	3	3	1	1	1	1	1
975	902	2	2009	PT	1	1	1	2	1	1	2	1	1	1	2	1	1	1	1	1	1	1	1	3	1	1	1	2	-1
976	900	2	2009	PT	1	1	1	1	1	1	2	1	1	1	2	1	1	1	1	1	2	1	-1	3	1	1	1	1	-1
977	901	2	2009	PT	1	1	1	2	1	1	2	1	1	1	2	1	1	1	1	1	2	1	1	1	1	1	1	1	-1
978	1027	1	2009	ES	1	1	1	1	1	1	1	1	1	3	1	1	1	1	3	3	2	3	3	1	1	1	1	1	-1
979	1028	1	2009	ES	1	1	1	1	1	1	1	1	1	3	1	1	3	3	3	3	2	3	1	1	3	1	1	1	-1
980	869	2	2009	ES	1	1	1	1	1	1	1	1	1	1	1	1	1	1	3	1	2	1	1	1	1	1	1	1	-1
981	867	2	2009	ES	1	1	1	1	1	1	1	1	1	1	1	1	1	1	1	1	1	1	1	1	1	1	1	1	-1
982	540	2	2009	ES	1	1	1	1	1	1	1	1	1	1	1	1	1	1	1	1	1	1	1	1	1	1	1	1	-1
983	198	3	2009	ES	1	1	1	1	1	1	1	1	1	1	1	1	1	1	3	1	2	1	3	1	1	1	1	1	-1
984	199	4	2009	ES	1	1	1	1	1	1	1	1	1	1	2	1	1	1	3	1	2	1	1	1	1	1	1	1	-1
985	862	2	2009	ES	1	1	1	2	1	1	2	1	1	3	1	1	1	1	1	3	2	1	1	1	1	1	1	1	-1
986	861	2	2009	ES	1	1	1	1	1	1	1	1	1	1	1	1	1	1	3	1	2	1	1	1	1	1	1	1	-1
987	1029	1	2009	ES	1	1	1	1	1	1	1	1	1	1	1	1	1	1	3	3	2	3	1	1	1	1	1	1	-1
988	1030	1	2009	ES	1	1	1	1	1	1	1	1	1	1	1	3	1	1	3	1	2	1	1	1	1	1	1	1	-1
989	1031	1	2009	ES	1	1	1	1	1	1	1	1	1	1	1	1	1	1	1	1	1	1	1	1	1	1	1	1	-1
990	546	2	2009	ES	1	1	1	1	1	1	1	1	1	1	1	1	1	1	1	1	2	1	1	1	1	1	1	1	-1
991	189	3	2009	ES	1	1	1	1	1	1	1	1	1	1	1	1	1	3	3	3	2	1	1	1	1	1	1	1	-1
992	874	2	2009	ES	1	1	1	1	1	1	1	1	1	1	1	1	1	1	3	1	2	1	1	1	1	1	1	1	-1
993	1032	1	2009	ES	1	1	1	1	1	1	1	1	1	1	1	1	1	1	3	3	2	1	1	1	1	1	1	1	-1
994	1033	1	2009	ES	1	1	1	1	1	1	1	1	1	1	2	2	1	2	3	3	2	3	3	1	1	1	1	1	-1
995	1034	1	2009	ES	1	1	1	1	1	1	1	1	1	1	1	1	1	1	3	1	2	1	1	1	1	1	1	1	-1
996	1035	1	2009	ES	1	1	1	1	1	1	1	1	1	1	1	1	1	1	3	1	2	1	1	1	1	1	1	1	-1
997	114	3	2009	ES	1	1	1	1	1	1	1	1	1	1	1	1	1	1	3	1	2	3	1	1	1	1	1	1	-1
998	116	3	2009	ES	1	1	1	1	1	1	1	1	1	1	1	1	1	1	1	1	2	3	1	1	1	1	1	1	-1
999	149	3	2009	ES	1	1	1	1	1	1	1	1	1	1	1	1	1	1	1	1	1	1	1	1	1	1	1	1	-1
1000	613	2	2009	ES	1	1	1	1	1	1	1	1	1	1	1	1	1	1	1	1	1	1	1	1	1	1	1	1	-1
1001	112	4	2009	ES	1	1	1	1	1	1	1	1	1	1	1	1	1	1	3	1	2	3	1	1	1	1	1	1	-1
1002	119	4	2009	ES	1	1	1	1	1	1	1	1	1	1	1	1	1	1	3	1	2	3	1	1	1	1	1	1	-1
1003	120	2	2009	ES	1	1	1	1	1	1	1	1	1	1	1	1	1	1	1	1	2	1	1	1	1	1	1	1	-1
1004	124	3	2009	ES	1	1	1	1	1	1	1	1	1	1	1	1	1	1	1	1	1	1	1	1	1	1	1	1	-1
1005	122	4	2009	ES	1	1	1	1	1	1	1	1	1	1	1	1	1	1	3	1	2	3	1	1	1	1	1	1	-1
1006	1036	1	2009	ES	1	1	1	2	1	1	2	1	1	1	1	1	1	1	1	1	2	1	1	1	1	1	1	1	-1
1007	125	4	2009	ES	1	1	1	1	1	1	1	1	1	1	1	1	3	1	1	1	1	1	1	1	1	1	1	1	-1
1008	106	4	2009	ES	1	1	1	1	1	1	1	1	1	1	1	1	1	1	3	1	2	1	1	1	1	1	1	1	-1
1009	110	4	2009	ES	1	1	1	1	1	1	1	1	1	1	1	1	1	1	1	1	1	1	1	1	1	1	1	1	-1
1010	109	3	2009	ES	1	1	1	1	1	1	1	1	1	1	1	1	1	1	1	1	2	1	1	1	1	1	1	1	-1
1011	144	4	2009	ES	1	1	1	1	1	1	1	1	1	1	1	1	1	1	3	1	2	1	1	1	1	1	1	1	-1
1012	610	2	2009	ES	1	1	1	1	1	1	1	1	1	1	1	1	1	1	1	1	1	1	1	1	1	1	1	1	-1
1013	145	4	2009	ES	1	1	1	1	1	1	1	1	1	1	1	1	1	1	1	1	1	1	1	1	1	1	1	1	-1
1014	142	4	2009	ES	1	1	1	1	1	1	1	1	1	1	1	1	1	1	1	1	1	1	1	1	1	1	1	1	-1
1015	141	4	2009	ES	1	1	1	1	1	1	1	1	1	1	1	1	1	1	1	1	1	1	1	1	1	1	1	1	-1
1016	175	4	2009	ES	1	1	1	1	1	1	1	1	1	1	1	1	1	1	1	1	2	1	1	1	1	1	1	1	-1
1017	172	3	2009	ES	1	1	1	1	1	1	1	1	1	1	1	1	1	1	1	1	1	1	1	1	1	1	1	1	-1
1018	1037	1	2009	ES	1	1	1	1	1	1	1	1	1	1	1	1	1	1	1	1	1	1	1	1	1	1	1	1	-1
1019	163	4	2009	ES	1	1	1	1	1	1	1	1	1	1	1	1	1	1	1	1	1	1	1	1	1	1	1	1	-1
1020	856	2	2009	ES	1	1	1	1	1	1	1	1	1	1	1	1	1	1	1	1	1	1	1	1	1	1	1	1	-1
1021	857	2	2009	ES	1	1	1	1	1	1	1	1	1	1	1	1	1	1	1	1	1	1	1	1	1	1	1	1	-1
1022	150	4	2009	ES	1	1	1	1	1	1	1	1	1	1	1	1	1	1	1	3	2	1	1	1	1	1	1	1	-1
1023	1102	1	2009	ES	1	1	1	1	1	1	1	1	1	1	1	1	1	1	1	1	1	1	1	1	1	1	1	1	-1
1024	154	4	2009	ES	1	1	1	1	1	1	1	1	1	1	1	1	1	1	1	1	1	1	1	1	1	1	1	1	-1
1025	853	2	2009	ES	1	1	1	1	1	1	1	1	1	1	1	1	1	1	1	1	1	1	1	1	1	1	1	1	1
1026	852	2	2009	ES	1	1	1	1	1	1	1	1	1	1	1	1	1	1	1	1	1	1	1	1	1	1	1	1	1
1027	573	3	2009	ES	1	1	1	1	1	1	1	1	1	1	1	1	1	1	1	1	1	1	1	1	1	1	1	1	-1
1028	578	3	2009	ES	1	1	1	1	1	1	1	1	1	1	1	1	1	1	3	1	2	1	1	3	1	1	1	1	-1
1029	574	3	2009	ES	1	1	1	1	1	1	1	1	1	1	1	1	1	1	3	1	2	3	1	1	1	1	1	1	-1
1030	579	3	2009	ES	1	1	1	1	1	1	1	1	1	1	1	1	1	1	1	1	1	1	1	1	1	1	1	1	-1
1031	161	3	2009	ES	1	1	1	1	1	1	1	1	1	1	1	1	1	1	1	1	1	1	1	1	1	1	1	1	-1
1032	854	2	2009	ES	1	1	1	1	1	1	1	1	1	1	1	1	1	1	1	1	1	1	1	1	1	1	1	1	1
1033	158	4	2009	ES	1	1	1	1	1	1	1	1	1	1	1	1	1	1	1	1	1	1	1	1	1	1	1	1	-1
1034	584	1	2009	ES	1	1	1	2	1	1	2	1	1	2	1	1	1	1	1	1	1	1	1	1	1	1	1	1	1
1035	168	4	2009	ES	1	1	1	2	1	1	2	1	1	1	1	1	1	1	1	1	3	1	2	1	1	1	1	1	-1
1036	171	4	2009	ES	1	1	1	1	1	1	1	1	1	1	1	1	1	1	1	1	1	1	1	1	1	1	1	1	-1
1037	851	2	2009	ES	1	1	1	1	1	1	1	1	1	1	1	1	1	1	3	1	2	1	1	3	1	1	1	1	1
1038	571	2	2009	ES	1	1	1	1	1	1	1	1	1	1	1	1	1	1	1	1	1	1	1	1	1	1	1	1	1
1039	569	2	2009	ES	1	1	1	1	1	1	1	1	1	1	1	1	1	1	1	1	1	1	1	1	1	1	1	1	-1
1040	547	2	2009	ES	1	1	1	1	1	1	1	1	1	1	1	1	1	1	1	1	1	1	1	1	1	1	1	1	-1
1041	157	3	2009	ES	1	1	1	1	1	1	1	1	1	1	1	1	1	1	3	1	2	1	1	1	1	1	1	1	-1
1042	166	4	2009	ES	1	1	1	1	1	1	1	1	1	1	1	1	1	1	3	1	2	1	1	1	1	1	1	1	-1
1043	165	4	2009	ES	1	1	1	1	1	1	1	1	1	1	1	1	1	1	1	1	1	1	1	1	1	1	1	1	-1
1044	176	4	2009	ES	1	1	1	1	1	1	1	1	1	1	1	1	1	1	1	1	1	1	1	1	1	1	1	1	-1
1045	178	4	2009	ES	1	1	1	1	1	1	1	1	1	1	1	1	1	1	1	1	1	1	1	1	1	1	1	1	-1
1046	181	3	2009	ES	1	1	1	1	1	1	1	1	1	1	1	1	1	1	1	1	1	1	1	1	1	1	1	1	-1
1047	174	4	2009	ES	1	1	1	1	1	1	1	1	1	1	1	1	1	1	1	1	1	1	1	1	1	1	1	1	-1
1048	160	3	2009	ES	1	1	1	1	1	1	1	1	1	1	1	1	1	1	3	1	2	1	1	1	1	1	1	1	-1
1049	561	2	2009	ES	1	1	1	2	1	1	2	1	1	1	1	1	1	1	1	1	1	1	1	1	1	1	1	1	-1
1050	555	2	2009	ES	1	1	1	1	1	1	1	1	1	1	1	1	1	1	1	1	2	1	1	1	1	1	1	1	1
1051	553	2	2009	ES	1	1	1	1	1	1	1	1	1	1	1	1	1	1	1	1	1	1	1	1	1	1	1	1	-1
1052	557	3	2009	ES	1	1	1	1	1	1	1	1	1	1	1	1	1	1	3	1	2	1	1	1	1	1	1	1	-1
1053	151	4	2009	ES	1	1	1	1	1	1	1	1	1	1	1	1	1	1	1	1	1	1	1	1	1	1	1	1	-1
1054	152	4	2009	ES	1	1	1	1	1	1	1	1	1	1	1	1	1	1	1	1	1	1	1	1	1	1	1	1	-1
1055	153	3	2009	ES	1	1	1	1	1	1	1	1	1	1	1	1	1	1	1	1	2	1	1	1	1	1	1	1	-1
1056	159	2	2009	ES	1	1	1	1	1	1	1	1	1	1	1	1	1	1	1	1	1	1	1	1	1	1	1	1	-1
1057	132	2	2009	ES	1	1	1	1	1	1	1	1	1	1	1	1	1	1	1	1	1	1	1	1	1	1	1	1	-1
1058	585	3	2009	ES	1	1	1	1	1	1	1	1	1	1	1	1	1	1	1	3	1	1	1	1	1	1	1	1	-1
1059	130	3	2009	ES	1	1	1	1	1	1	1	1	1	1	1	1	1	1	1	1	1	1	1	1	1	1	1	1	-1
1060	588	2	2009	ES	1	1	1	1	1	1	1	1	1	1	1	1	1	1	1	1	1	1	1	1	1	1	1	1	-1
1061	127	3	2009	ES	1	1	1	1	1	1	1	1	1	1	1	1	1	1	1	1	1	1	1	1	1	1	1	1	-1
1062	133	3	2009	ES	1	1	1	1	1	1	1	1	1	1	1	1	1	1	1	1	1	1	1	1	1	1	1	1	-1
1063	596	2	2009	ES	1	1	1	1	1	1	1	1	1	1	1	1	1	1	1	1	1	1	1	1	1	1	1	1	-1
1064	601	3	2009	ES	1	1	1	1	1	1	1	1	1	1	1	1	1	1	1	1	2	1	1	1	1	1	1	1	-1
1065	135	4	2009	ES	1	1	1	1	1	1	1	1	1	1	1	1	1	1	1	1	2	1	1	1	1	1	1	1	-1
1066	597	3	2009	ES	1	1	1	1	1	1	1	1	1	1	1	1	1	1	1	1	1	1	1	1	1	1	1	1	1
1067	598	3	2009	ES	1	1	1	1	1	1	1	1	1	1	1	1	1	1	1	1	1	1	1	1	1	1	1	1	-1
1068	599	3	2009	ES	1	1	1	1	1	1	1	1	1	1	1	1	1	1	1	1	1	1	1	1	1	1	1	1	-1
1069	180	3	2009	ES	1	1	1	1	1	1	1	1	1	1	1	1	1	1	1	1	1	1	1	1	1	1	1	1	-1
1070	179	4	2009	ES	1	1	1	1	1	1	1	1	1	1	1	1	1	1	1	1	1	1	1	1	1	1	1	1	-1
1071	102	4	2009	ES	1	1	1	1	1	1	1	1	1	1	1	1	1	1	1	1	1	1	1	1	1	1	1	1	-1
1072	100	3	2009	ES	1	1	1	2	1	1	2	1	1	1	1	1	1	1	3	3	2	3	1	3	1	1	1	1	-1
1073	103	3	2009	ES	1	1	1	1	1	1	1	1	1	1	1	1	1	1	3	1	2	1	1	1	1	1	1	1	-1
1074	617	2	2009	ES	1	1	1	1	1	1	1	1	1	1	1	1	1	1	1	1	1	1	1	1	1	1	1	1	-1
1075	618	3	2009	ES	1	1	1	1	1	1	1	1	1	1	1	1	1	1	1	1	2	1	1	1	1	1	1	1	-1
1076	1038	1	2009	ES	1	1	1	1	1	1	1	1	1	1	1	1	1	1	3	1	2	1	1	1	1	1	1	1	-1
1077	1039	1	2009	ES	1	1	1	1	1	1	1	1	1	1	1	1	1	1	1	1	1	1	1	1	1	1	1	1	-1
1078	1040	1	2009	PL	1	1	1	1	1	1	1	1	1	1	1	1	1	1	1	1	1	1	1	1	1	1	1	1	-1
1079	1041	1	2009	PL	1	1	1	1	1	1	1	1	1	1	1	1	1	1	1	1	2	1	1	1	1	1	1	1	-1
1080	1042	1	2009	PL	1	1	1	1	1	1	1	1	1	1	1	1	1	1	1	1	2	1	1	1	1	1	1	1	-1
1081	1043	1	2010	RO	1	1	1	1	1	1	1	1	1	1	1	1	1	2	3	2	2	-1	2	1	3	1	1	1	1
1082	967	2	2010	RO	1	1	1	1	1	1	1	1	1	1	2	2	2	2	3	2	2	-1	3	1	1	1	1	1	1
1083	917	3	2010	RO	1	1	1	1	1	1	1	1	1	1	1	1	1	1	3	1	2	-1	3	1	3	1	1	1	1
1084	976	2	2010	RO	1	1	1	1	1	1	1	1	1	1	2	2	2	2	3	2	2	-1	3	1	1	1	1	1	1
1085	975	2	2010	RO	1	1	1	1	1	1	1	1	1	1	2	2	2	2	2	2	2	-1	1	1	3	1	1	1	1
1086	968	2	2010	RO	1	1	1	1	1	1	1	1	1	1	2	2	2	2	2	2	2	-1	3	1	3	1	1	1	1
1087	972	2	2010	RO	1	1	1	1	1	1	1	1	1	1	2	2	2	2	2	2	2	-1	3	1	3	1	1	1	1
1088	977	2	2010	RO	1	1	1	1	1	1	1	1	1	1	1	1	1	1	3	1	2	-1	3	1	3	1	1	1	1
1089	981	2	2010	RO	1	3	1	2	1	1	1	2	1	1	2	2	2	2	3	2	2	3	1	1	3	1	1	1	-1
1090	922	3	2010	RO	1	1	1	1	1	1	1	1	1	3	1	1	1	1	3	1	2	1	1	1	1	1	3	1	1
1091	980	2	2010	RO	1	1	1	1	1	1	1	1	1	1	1	1	2	2	3	2	2	3	1	1	1	1	1	1	-1
1092	1044	1	2010	RO	1	3	1	1	1	1	1	1	1	1	2	1	2	1	3	1	2	3	1	1	3	1	1	1	-1
1093	1045	1	2010	RO	1	1	1	1	1	1	1	1	1	1	1	1	1	1	1	1	1	1	1	1	3	1	1	1	-1
1094	1046	1	2010	RO	1	2	1	1	1	1	1	1	1	2	2	2	1	2	3	1	2	-1	1	1	3	1	2	1	-1
1095	960	2	2010	RO	1	1	1	1	1	1	1	1	1	1	1	1	1	2	1	1	2	-1	1	1	1	1	1	1	-1
1096	1047	1	2010	RO	1	1	1	1	1	1	1	1	1	1	1	1	1	1	1	1	1	-1	1	1	1	1	1	1	1
1097	1048	1	2010	RO	1	1	1	1	1	1	1	1	1	1	2	1	2	2	1	2	1	-1	1	1	1	3	1	1	-1
1098	1049	1	2010	RO	1	1	1	1	1	1	1	1	1	1	1	1	1	1	1	1	1	1	1	1	1	1	1	1	-1
1099	1050	1	2010	RO	1	1	1	1	1	1	1	1	1	1	1	1	1	1	3	1	1	1	1	1	1	1	1	1	1
1100	1051	1	2010	RO	1	1	1	1	1	1	1	1	1	1	1	1	1	2	1	1	2	-1	1	1	1	1	1	1	-1
1101	966	2	2010	RO	1	1	1	1	1	1	1	1	1	2	1	1	3	3	3	1	3	2	1	1	2	1	1	4	1
1102	1052	1	2010	RO	1	1	1	1	1	1	1	1	1	3	1	1	3	3	3	1	3	3	1	1	1	1	1	1	-1
1103	1053	1	2010	RO	1	3	1	1	1	1	1	1	1	2	1	2	2	2	3	2	2	3	1	1	3	3	3	1	-1
1104	1054	1	2010	RO	1	1	1	1	1	1	1	1	1	1	1	2	1	1	3	1	2	1	3	1	1	4	1	1	-1
1105	716	2	2010	RO	1	1	1	1	1	1	1	1	1	1	1	1	1	1	3	1	2	1	1	1	1	4	4	4	-1
1106	1055	1	2010	PT	1	1	1	2	1	1	2	1	1	1	2	1	1	1	2	1	2	1	3	3	1	1	1	2	1
1107	1056	1	2010	PT	1	1	1	2	1	1	2	1	1	1	2	1	1	1	1	3	2	1	3	3	1	1	1	1	1
1108	1057	1	2010	PT	1	1	1	2	1	1	2	1	1	1	2	1	1	1	1	3	2	1	3	3	1	1	1	1	-1
1109	1058	1	2010	PT	1	1	1	1	1	1	1	1	1	1	2	1	1	1	1	1	2	1	3	3	1	1	1	1	-1
1110	1059	1	2010	PT	1	1	1	1	1	1	1	1	1	1	2	1	1	1	1	1	1	1	3	3	1	1	1	1	-1
1111	884	3	2010	PT	1	1	1	1	1	1	1	1	1	1	1	1	1	1	1	1	2	1	3	3	1	1	1	1	-1
1112	1060	1	2010	PT	1	1	1	2	1	1	2	1	1	1	2	1	1	1	2	1	2	1	3	3	1	1	1	1	-1
1113	1061	1	2010	PT	1	1	1	1	1	1	1	1	1	1	1	1	1	1	1	1	2	1	3	3	1	1	1	1	-1
1114	1062	1	2010	PT	1	1	1	2	1	1	2	1	1	1	1	1	1	1	2	3	2	1	3	3	1	1	1	1	-1
1115	1013	2	2010	PT	1	1	1	2	1	1	2	1	1	1	1	1	1	1	1	1	1	1	3	3	1	1	1	1	-1
1116	1014	2	2010	PT	1	1	1	1	1	1	1	1	1	1	1	1	1	1	1	1	1	1	3	3	1	1	1	1	-1
1117	1019	2	2010	PT	1	1	1	2	1	1	2	1	1	1	2	1	1	1	1	1	1	1	3	3	1	1	1	1	-1
1118	1020	2	2010	PT	1	1	1	1	1	1	1	1	1	1	2	1	1	1	1	1	2	1	3	3	1	1	1	1	-1
1119	879	3	2010	PT	1	1	1	2	1	1	2	1	1	1	2	1	1	1	1	1	1	1	3	3	1	1	1	1	1
1120	1016	2	2010	PT	1	1	1	1	1	1	1	1	1	1	2	1	1	1	1	1	2	1	3	3	1	1	1	1	-1
1121	1063	1	2010	PT	1	1	1	1	1	1	1	1	1	1	2	1	1	1	1	3	1	1	3	3	1	1	1	1	-1
1122	902	3	2010	PT	1	1	1	1	1	1	1	1	1	1	1	1	1	1	1	1	1	1	3	3	1	1	1	1	-1
1123	1064	1	2010	PT	1	1	1	1	1	1	1	1	1	1	1	1	1	1	1	1	1	1	3	3	1	1	1	1	-1
1124	900	3	2010	PT	1	1	1	1	1	1	1	1	1	1	2	1	1	1	1	1	2	1	1	3	1	1	1	1	-1
1125	1065	1	2010	PT	1	1	1	1	1	1	1	1	1	1	2	1	1	1	1	1	2	1	3	3	1	1	1	1	-1
1126	1066	1	2010	PT	1	1	1	2	1	1	2	1	1	1	2	1	1	1	1	1	2	1	3	3	1	1	1	1	-1
1127	1023	2	2010	PT	1	1	1	2	1	1	2	1	1	1	2	1	1	1	1	1	2	1	3	3	1	1	1	1	-1
1128	909	3	2010	PT	1	1	1	2	1	1	2	1	1	1	2	1	1	1	1	1	2	1	3	3	1	1	1	1	1
1129	1067	1	2010	PT	1	1	1	1	1	1	1	1	1	1	2	1	1	1	1	1	2	1	3	3	1	1	1	1	1
1130	1068	1	2010	PT	1	1	1	1	1	1	1	1	1	1	1	1	1	1	1	1	1	1	3	3	1	1	1	1	1
1131	1025	2	2010	PT	1	1	1	1	1	1	1	1	1	1	2	1	1	1	1	1	1	1	3	3	1	1	1	1	1
1132	1069	1	2010	PT	1	1	1	1	1	1	1	1	1	1	2	1	1	1	1	1	2	1	3	3	1	1	1	1	-1
1133	1070	2	2010	PT	1	1	1	2	1	1	2	1	1	1	2	1	1	1	1	1	1	1	3	3	1	1	1	1	1
1134	903	3	2010	PT	1	1	1	2	1	1	2	1	1	1	2	1	1	1	1	1	2	1	3	3	1	1	1	1	-1
1135	894	3	2010	PT	1	1	1	2	1	1	2	1	1	1	1	1	1	1	1	1	1	1	1	3	1	1	1	1	-1
1136	893	3	2010	PT	1	1	1	2	1	1	2	1	1	1	2	1	1	1	1	1	2	1	1	3	1	1	1	1	-1
1137	897	3	2010	PT	1	1	1	1	1	1	1	1	1	1	1	1	1	1	1	1	1	1	1	3	1	1	1	1	-1
1138	890	3	2010	PT	1	1	1	1	1	1	1	1	1	1	2	1	1	1	1	1	2	1	3	3	1	1	1	1	-1
1139	891	3	2010	PT	1	1	1	1	1	1	1	1	1	1	2	1	1	1	1	1	2	1	1	3	1	1	1	1	-1
1140	895	3	2010	PT	1	1	1	1	1	1	1	1	1	1	2	1	1	1	1	1	2	1	1	3	1	1	1	1	-1
1141	896	3	2010	PT	1	1	1	2	1	1	2	1	1	1	1	1	1	1	1	1	1	1	1	3	1	1	1	1	1
1142	889	3	2010	PT	1	1	1	2	1	1	2	1	1	1	1	1	1	1	1	1	2	1	1	3	1	1	1	1	-1
1143	912	3	2010	PT	1	1	1	1	1	1	1	1	1	1	2	1	1	1	1	1	1	1	3	3	1	1	1	1	1
1144	913	3	2010	PT	1	1	1	1	1	1	1	1	1	1	1	1	1	1	1	1	3	1	3	3	1	1	1	1	1
1145	1071	1	2010	PT	1	1	1	1	1	1	2	1	1	1	1	1	1	1	1	1	1	1	1	3	1	1	1	1	1
1146	914	3	2010	PT	1	1	1	2	1	1	2	1	1	1	2	1	1	1	1	1	2	1	3	3	1	1	1	1	1
1147	1072	1	2010	PT	1	1	1	1	1	1	1	1	1	1	2	1	1	1	1	1	3	1	3	3	1	1	1	1	1
1148	1026	2	2010	PT	1	1	1	2	1	1	2	1	1	1	2	1	1	1	1	1	1	1	3	3	1	1	1	1	1
1149	1073	1	2010	SK	1	1	1	2	1	1	1	1	1	1	1	1	1	1	3	1	2	1	1	1	1	1	1	1	1
1150	738	4	2010	SK	1	2	1	1	1	1	1	1	1	3	1	1	1	3	3	3	2	1	1	1	1	1	1	1	2
1151	821	3	2010	SK	1	1	1	1	1	1	1	1	1	1	1	1	1	1	1	1	1	1	1	1	1	1	1	1	-1
1152	317	4	2010	SK	1	1	1	1	1	1	1	1	1	1	1	1	1	1	1	1	1	1	1	1	1	1	1	1	-1
1153	805	3	2010	CZ	1	3	1	1	1	1	1	1	1	3	2	1	1	3	1	3	2	-1	1	1	1	1	1	1	1
1154	746	4	2010	CZ	1	1	1	1	1	1	1	1	1	1	1	1	1	1	1	1	1	1	1	1	1	1	1	1	1
1155	806	3	2010	CZ	1	1	1	1	1	1	1	1	1	1	1	1	1	1	3	1	2	3	3	3	1	1	1	1	1
1156	751	4	2010	CZ	1	1	1	2	1	1	2	1	1	3	1	1	1	1	1	1	1	1	1	1	1	1	1	1	1
1157	757	3	2010	CZ	1	1	1	2	1	1	2	1	1	1	1	1	1	1	1	1	1	-1	1	1	1	1	1	1	1
1158	326	5	2010	CZ	1	1	1	1	1	1	1	1	1	1	1	1	1	3	1	3	2	1	3	1	1	1	1	1	1
1159	992	2	2010	CZ	1	1	1	2	1	1	2	1	1	1	1	1	3	1	3	3	2	-1	3	-1	1	4	1	1	2
1160	347	2	2010	CZ	1	1	1	1	1	1	1	1	1	1	1	1	1	1	1	3	2	-1	3	1	1	1	1	1	3
1161	1074	1	2010	CZ	1	2	1	1	1	1	1	1	1	1	1	1	1	1	3	1	2	-1	3	1	1	1	1	1	1
1162	1075	1	2010	CZ	1	1	1	2	1	1	2	1	1	1	1	1	1	1	3	1	3	-1	3	1	1	1	1	1	-1
1163	1076	1	2010	CZ	1	1	1	1	1	1	1	1	1	1	2	1	1	2	3	1	2	1	3	1	1	1	1	1	3
1164	990	2	2010	CZ	1	1	1	1	1	1	1	1	1	1	1	1	1	1	3	1	2	1	3	1	1	1	1	1	2
1165	1007	2	2010	CZ	1	1	1	1	1	1	1	1	1	1	1	1	1	1	1	1	1	1	1	1	1	1	1	1	-1
1166	1077	1	2010	CZ	1	1	1	1	1	1	1	1	1	1	1	1	1	1	1	1	1	1	3	1	1	1	1	2	3
1167	349	3	2010	CZ	1	1	1	2	1	1	2	1	1	3	1	1	1	1	3	1	2	-1	-1	1	1	4	4	4	3
1168	1078	1	2010	CZ	1	1	1	1	1	1	1	1	1	1	1	1	1	1	1	1	2	-1	3	1	1	1	1	1	3
1169	1079	1	2010	CZ	1	1	1	1	2	1	1	1	1	1	1	1	1	1	3	1	1	3	1	1	1	1	1	1	3
1170	764	3	2010	CZ	1	2	1	2	1	1	2	1	1	2	1	1	1	1	3	3	2	1	3	1	1	1	1	1	-1
1171	1080	1	2010	CZ	1	1	1	1	1	1	1	1	1	1	1	1	1	1	1	1	1	1	1	1	1	1	1	1	-1
1172	1081	1	2010	CZ	1	1	1	2	1	1	2	1	1	3	1	1	1	1	3	1	2	-1	1	1	1	1	1	1	-1
1173	999	2	2010	CZ	1	2	1	1	1	1	1	1	1	3	1	1	1	1	1	1	1	1	1	1	1	1	1	1	-1
1174	814	2	2010	CZ	1	1	1	1	1	1	1	1	1	3	1	1	1	1	1	1	2	-1	3	1	1	1	4	1	2
1175	791	3	2010	CZ	1	1	1	1	1	1	1	1	1	1	1	1	1	2	3	3	2	-1	3	1	1	1	1	1	2
1176	782	4	2010	CZ	1	1	1	1	1	1	1	1	1	3	1	1	1	1	1	1	1	1	1	1	1	4	4	4	1
1177	747	4	2010	CZ	1	1	1	2	1	1	2	1	1	3	1	1	1	1	3	3	2	1	3	1	1	1	1	1	2
1178	996	2	2010	CZ	1	1	1	2	1	1	2	1	1	1	1	1	1	1	1	3	2	-1	1	-1	1	1	4	1	3
1179	324	4	2010	CZ	1	1	1	2	1	1	2	1	1	1	1	1	1	1	1	1	2	1	1	1	1	1	1	3	3
1180	991	2	2010	CZ	1	1	1	1	1	1	1	1	1	3	1	1	1	1	1	3	2	-1	3	1	1	4	4	4	1
1181	345	5	2010	CZ	1	1	1	2	1	1	2	1	1	1	1	1	1	1	1	3	2	1	3	1	1	1	1	1	3
1182	1002	2	2010	CZ	1	1	1	1	1	1	1	1	1	1	1	1	1	1	1	1	1	-1	1	1	1	1	4	1	1
1183	1005	2	2010	CZ	1	1	1	2	1	1	2	1	1	1	1	1	1	1	1	1	1	1	1	1	1	1	1	1	1
1184	1006	2	2010	CZ	1	1	1	2	1	1	2	1	1	1	1	1	1	1	1	1	1	-1	1	1	1	1	1	4	1
1185	1082	1	2010	CZ	1	1	1	1	1	1	1	1	1	1	1	1	1	1	1	1	1	1	1	1	1	1	1	1	1
1186	1083	1	2010	CZ	1	1	1	1	1	1	1	1	1	1	1	1	1	1	1	1	1	1	1	1	1	1	1	1	3
1187	798	3	2010	CZ	1	1	1	1	1	1	1	1	1	1	1	1	1	1	3	1	2	1	3	1	1	4	4	4	2
1188	1003	2	2010	CZ	1	1	1	2	1	1	2	1	1	1	1	1	1	1	1	1	1	1	3	1	1	1	1	1	1
1189	1084	1	2010	CZ	2	3	1	1	1	1	1	1	1	3	1	1	1	1	1	3	1	1	1	1	1	1	1	1	3
1190	1011	2	2010	CZ	1	1	1	2	1	1	2	1	1	2	1	1	1	2	3	2	2	3	3	1	1	1	1	1	1
1191	1009	2	2010	CZ	1	1	1	1	1	1	1	1	1	1	1	1	1	1	1	1	2	-1	1	1	1	1	1	1	1
1192	175	5	2010	ES	1	1	1	1	1	1	1	1	1	1	1	1	1	1	3	3	2	1	1	1	1	1	1	1	-1
1193	172	4	2010	ES	1	1	1	1	1	1	1	1	1	1	1	1	1	1	1	1	1	1	1	1	1	1	1	1	-1
1194	163	5	2010	ES	1	1	1	1	1	1	1	1	1	1	1	1	1	1	3	1	2	1	1	1	1	1	1	1	-1
1195	856	3	2010	ES	1	1	1	1	1	1	1	1	1	1	1	1	1	1	1	1	1	1	1	1	1	1	1	1	-1
1196	857	3	2010	ES	1	1	1	1	1	1	1	1	1	1	1	1	1	1	1	1	1	1	1	1	1	1	1	1	-1
1197	150	5	2010	ES	1	1	1	1	1	1	1	1	1	1	1	1	1	3	3	3	2	1	1	1	1	1	1	1	-1
1198	1102	2	2010	ES	1	1	1	1	1	1	1	1	1	1	1	1	1	1	1	1	1	1	1	1	1	1	1	1	-1
1199	154	5	2010	ES	1	1	1	1	1	1	1	1	1	1	1	1	1	1	1	1	1	1	1	1	1	1	1	1	-1
1200	573	4	2010	ES	1	1	1	1	1	1	1	1	1	1	1	1	1	1	1	1	1	1	1	1	1	1	1	1	-1
1201	578	4	2010	ES	1	1	1	1	1	1	1	1	1	1	1	1	1	1	1	1	1	1	1	1	1	1	1	1	-1
1202	574	4	2010	ES	1	1	1	1	1	1	1	1	1	1	1	1	1	1	3	1	2	1	1	1	1	1	1	1	-1
1203	854	3	2010	ES	1	1	1	1	1	1	1	1	1	1	1	1	1	1	3	1	2	1	1	1	1	1	1	1	1
1204	158	5	2010	ES	1	1	1	1	1	1	1	1	1	1	1	1	1	1	1	1	1	1	1	1	1	1	1	1	-1
1205	584	2	2010	ES	1	1	1	2	1	1	2	1	1	1	1	1	1	1	1	1	1	1	1	1	1	1	1	1	1
1206	168	5	2010	ES	1	1	1	1	1	1	1	1	1	1	1	1	1	3	3	3	2	1	1	1	1	1	1	1	-1
1207	171	5	2010	ES	1	1	1	1	1	1	1	1	1	1	1	1	1	1	1	3	1	1	1	1	1	1	1	1	-1
1208	851	3	2010	ES	1	1	1	2	1	1	2	1	1	1	1	1	1	1	1	1	1	1	1	1	1	1	1	1	-1
1209	571	3	2010	ES	2	3	2	1	1	1	1	1	1	3	1	1	1	1	1	1	1	1	1	1	3	1	1	3	-1
1210	547	3	2010	ES	1	1	1	1	1	1	1	1	1	1	1	1	1	1	1	1	1	1	1	1	1	1	1	1	-1
1211	165	5	2010	ES	1	1	1	1	1	1	1	1	1	1	1	1	1	1	3	1	2	1	1	1	1	1	1	1	-1
1212	176	5	2010	ES	1	1	1	1	1	1	1	1	1	1	1	1	1	1	1	1	1	1	1	1	1	1	1	1	-1
1213	157	4	2010	ES	1	1	1	1	1	1	1	1	1	1	1	1	1	1	1	3	1	1	1	1	1	1	1	1	-1
1214	178	5	2010	ES	1	1	1	1	1	1	1	1	1	1	1	1	1	1	1	1	1	1	1	1	1	1	1	1	-1
1215	181	4	2010	ES	1	1	1	1	1	1	1	1	1	1	1	1	1	1	1	1	1	1	1	1	1	1	1	1	-1
1216	174	5	2010	ES	1	1	1	1	1	1	1	1	1	1	1	1	1	1	3	1	2	1	1	1	1	1	1	1	-1
1217	160	4	2010	ES	1	1	1	1	1	1	1	1	1	1	1	1	1	1	1	1	1	1	1	1	1	1	1	1	-1
1218	555	3	2010	ES	1	1	1	1	1	1	1	1	1	1	1	1	1	1	1	1	1	1	1	1	1	1	1	1	-1
1219	557	4	2010	ES	1	1	1	1	1	1	1	1	1	1	1	1	1	1	1	1	1	1	1	1	1	1	1	1	-1
1220	151	5	2010	ES	1	1	1	1	1	1	1	1	1	1	1	1	1	1	3	1	2	1	1	1	1	1	1	1	-1
1221	153	4	2010	ES	1	1	1	1	1	1	1	1	1	1	1	1	1	1	3	1	1	1	1	1	1	1	1	1	-1
1222	1085	1	2010	ES	1	1	1	1	1	1	1	1	1	1	1	1	1	1	1	3	1	1	1	1	1	1	1	1	-1
1223	1086	1	2010	ES	1	1	1	1	1	1	1	1	1	1	1	1	1	1	1	3	1	1	1	1	1	1	1	1	-1
1224	1087	1	2010	ES	1	1	1	1	1	1	1	1	1	1	1	1	1	1	3	3	2	3	1	1	1	1	1	1	-1
1225	1088	1	2010	ES	1	1	1	1	1	1	1	1	1	1	1	3	1	1	1	1	1	1	1	1	1	1	1	1	-1
1226	1089	1	2010	ES	1	1	1	1	1	1	1	1	1	1	1	1	1	1	3	1	1	1	1	1	1	1	1	1	-1
1227	1090	1	2010	ES	1	1	1	1	1	1	1	1	1	1	1	1	1	3	3	1	1	1	1	1	1	1	1	1	-1
1228	1091	1	2010	ES	1	1	1	2	1	1	2	1	1	1	1	1	3	1	3	1	1	1	1	1	1	1	1	1	-1
1229	1092	1	2010	ES	1	1	1	1	1	1	1	1	1	1	1	1	1	1	3	1	2	1	1	1	1	1	1	1	-1
1230	1093	1	2010	ES	1	1	1	2	1	1	2	1	1	1	1	1	1	1	1	1	2	1	1	3	1	2	1	1	-1
1231	855	2	2010	ES	1	1	1	1	1	1	1	1	1	1	1	1	1	1	1	1	1	1	1	1	1	1	1	1	-1
1232	1094	1	2010	ES	1	1	1	1	1	1	1	1	1	1	1	1	1	1	1	1	1	1	1	1	1	1	4	1	-1
1233	1095	1	2010	ES	1	1	1	1	1	1	1	1	1	1	1	1	1	1	1	1	1	1	1	1	1	1	4	1	-1
1234	1096	1	2010	ES	1	1	1	1	1	1	1	1	1	1	1	1	1	1	1	1	1	1	1	1	1	1	1	1	-1
1235	1097	1	2010	ES	1	1	1	1	1	1	1	1	1	1	1	1	1	1	3	1	2	1	1	1	1	1	1	1	1
1236	1098	1	2010	ES	1	1	1	1	1	1	1	1	1	1	1	1	1	1	3	1	2	1	1	1	1	1	1	1	-1
1237	1099	1	2010	ES	1	1	1	1	1	1	1	1	1	1	1	1	1	1	1	1	2	1	1	1	3	1	1	1	-1
1238	1100	1	2010	ES	1	1	1	1	1	1	1	1	1	1	1	1	1	1	1	1	1	1	1	1	1	1	1	1	-1
1239	1101	1	2010	ES	1	1	1	1	1	1	1	1	1	1	1	1	1	1	1	1	1	1	1	1	1	1	1	1	-1
1240	1037	2	2010	ES	1	1	1	1	1	1	1	1	1	1	1	1	1	1	1	1	1	1	1	1	1	1	1	1	-1
1241	155	3	2010	ES	1	1	1	1	1	1	1	1	1	1	1	1	1	1	1	1	1	1	1	1	1	1	1	1	-1
1242	1103	1	2010	ES	1	1	1	1	1	1	1	1	1	1	1	1	1	1	1	1	1	1	1	1	1	1	1	1	-1
1243	1104	1	2010	ES	1	1	1	1	1	1	1	1	1	1	1	1	1	1	1	1	1	1	1	1	1	1	1	1	-1
1244	859	2	2010	ES	1	1	1	1	1	1	1	1	1	1	1	1	1	1	1	1	1	1	1	1	1	1	1	1	-1
1245	1105	1	2010	ES	1	1	1	1	1	1	1	1	1	1	1	1	1	1	1	1	1	1	1	1	1	1	1	1	-1
1246	1106	1	2010	ES	1	1	1	1	1	1	1	1	1	1	1	1	1	1	1	1	1	1	1	1	1	1	1	1	-1
1247	1107	1	2010	ES	1	1	1	1	1	1	1	1	1	1	1	1	1	1	1	1	1	1	1	1	1	1	1	1	-1
1248	585	4	2010	ES	1	1	1	1	1	1	1	1	1	1	1	1	1	1	3	1	2	3	1	1	1	1	1	1	-1
1249	1108	1	2010	ES	1	1	1	1	1	1	1	1	1	1	1	1	1	1	3	1	2	1	1	1	1	1	1	1	-1
1250	133	4	2010	ES	1	1	1	1	1	1	1	1	1	1	1	1	1	1	3	1	2	1	1	1	1	1	1	1	-1
1251	598	4	2010	ES	1	1	1	1	1	1	1	1	1	1	1	1	1	1	1	1	1	1	1	1	1	1	1	1	-1
1252	599	4	2010	ES	1	1	1	1	1	1	1	1	1	1	1	1	1	1	1	1	1	1	1	1	1	1	1	1	-1
1253	102	5	2010	ES	1	1	1	1	1	1	1	1	1	1	1	1	1	1	3	1	2	3	1	1	1	1	1	1	-1
1254	100	4	2010	ES	1	1	1	2	1	1	2	1	1	1	1	1	1	1	3	1	1	3	1	1	1	1	1	1	-1
1255	103	4	2010	ES	1	1	1	1	1	1	1	1	1	1	1	1	1	1	3	1	2	3	1	1	1	1	1	1	-1
1256	617	3	2010	ES	1	1	1	1	1	1	1	1	1	1	1	1	1	1	3	1	2	3	1	1	1	1	1	1	-1
1257	1038	2	2010	ES	1	1	1	1	1	1	1	1	1	1	1	1	1	1	1	1	1	1	1	1	1	1	1	1	-1
1258	1109	1	2010	ES	1	1	1	1	1	1	1	1	1	1	1	1	1	1	1	1	1	1	1	1	1	1	1	1	-1
1259	1110	1	2010	ES	1	1	1	1	1	1	1	1	1	1	1	1	1	1	1	1	2	1	1	1	1	1	1	1	-1
1260	1111	1	2010	ES	1	1	1	1	1	1	1	1	1	1	1	1	1	1	1	1	1	1	1	1	1	1	1	1	-1
1261	1112	1	2010	ES	1	1	1	1	1	1	1	1	1	1	1	1	1	1	1	1	1	1	1	1	1	1	1	1	-1
1262	1113	1	2010	ES	1	1	1	1	1	1	1	1	1	1	1	1	1	1	3	1	2	3	1	1	1	1	1	1	-1
1263	1114	1	2010	ES	1	1	1	1	1	1	1	1	1	1	1	1	1	1	1	1	1	1	1	1	1	1	1	1	-1
1264	101	3	2010	ES	1	1	1	1	1	1	1	1	1	1	1	1	1	1	3	1	2	3	1	1	1	1	1	1	-1
1265	1115	1	2010	ES	1	1	1	1	1	1	1	1	1	1	1	1	1	1	3	1	2	1	1	1	1	1	1	1	-1
1266	1116	1	2010	ES	1	1	1	1	1	1	1	1	1	1	1	1	1	1	3	1	2	1	1	1	1	1	1	4	-1
1267	1117	1	2010	ES	1	1	1	1	1	1	1	1	1	1	1	1	1	1	1	1	2	1	1	1	1	1	1	1	-1
1268	586	2	2010	ES	1	1	1	1	1	1	1	1	1	1	1	1	1	1	3	1	2	1	1	1	1	1	1	1	-1
1269	1118	1	2010	ES	1	1	1	1	1	1	1	1	1	1	1	1	1	1	3	1	2	1	3	1	1	1	1	1	-1
1270	138	3	2010	ES	1	1	1	1	1	1	1	1	1	1	1	1	1	1	3	1	2	1	1	1	1	1	1	1	-1
1271	1119	1	2010	ES	1	1	1	1	1	1	1	1	1	1	1	1	1	1	3	1	2	1	1	1	1	1	1	1	-1
1272	605	3	2010	ES	1	1	1	1	1	1	1	1	1	1	1	1	1	1	1	1	1	1	1	1	1	1	1	1	-1
1273	846	2	2010	ES	1	1	1	1	1	1	1	1	1	1	1	1	1	1	1	1	1	1	1	1	1	1	1	1	-1
1274	845	2	2010	ES	1	1	1	1	1	1	1	1	1	1	1	1	1	1	1	1	1	1	1	1	1	1	1	1	-1
1275	1120	1	2010	ES	1	1	1	1	1	1	1	1	1	1	1	1	1	1	3	1	2	1	1	1	1	1	1	1	-1
1276	597	4	2010	ES	1	1	1	1	1	1	1	1	1	1	1	1	1	1	1	1	1	1	1	1	1	1	1	1	-1
1277	104	3	2010	ES	1	1	1	1	1	1	1	1	1	1	1	1	1	1	1	1	1	1	1	1	1	1	1	1	-1
1278	1121	1	2010	ES	1	1	1	1	1	1	1	1	1	1	1	1	1	1	1	1	2	1	1	3	1	1	1	1	-1
1279	619	3	2010	ES	1	1	1	1	1	1	1	1	1	1	1	1	1	1	3	1	1	3	1	1	1	1	1	1	-1
1280	1122	1	2010	ES	1	1	1	1	1	1	1	1	1	1	1	1	1	1	1	1	1	1	1	1	1	1	4	1	-1
1281	1123	1	2010	ES	1	1	1	1	1	1	1	1	1	1	1	1	1	1	1	1	1	1	1	1	1	1	1	1	-1
1282	1124	1	2010	ES	1	1	1	1	1	1	1	1	1	1	1	1	1	1	1	1	2	1	1	1	1	1	1	1	-1
1283	1125	1	2010	ES	1	1	1	1	1	1	1	1	1	1	1	1	1	1	1	1	1	1	1	1	1	1	1	1	-1
1284	1126	1	2010	ES	1	1	1	1	1	1	1	1	1	1	1	1	1	1	3	1	2	1	1	1	1	1	1	1	-1
1285	1127	1	2010	ES	1	1	1	1	1	1	1	1	1	1	1	1	1	1	3	1	2	3	1	1	1	1	1	1	-1
1286	124	4	2010	ES	1	1	1	1	1	1	1	1	1	1	1	1	1	1	1	1	1	1	1	1	1	1	1	1	-1
1287	122	5	2010	ES	1	1	1	1	1	1	1	1	1	1	1	1	1	1	1	1	2	1	1	1	1	1	3	4	-1
1288	1036	2	2010	ES	1	1	1	1	1	1	1	1	2	1	1	1	1	1	1	1	1	1	1	1	1	1	1	1	-1
1289	110	5	2010	ES	1	1	1	1	1	1	1	1	1	1	1	1	1	1	1	1	1	1	1	1	1	1	1	1	-1
1290	109	4	2010	ES	1	1	1	1	1	1	1	1	1	1	1	1	1	1	1	1	1	1	1	1	1	1	1	1	-1
1291	610	3	2010	ES	1	1	1	1	1	1	1	1	1	1	1	1	1	1	1	1	1	1	1	1	1	1	4	1	-1
1292	141	5	2010	ES	1	1	1	1	1	1	1	1	1	1	1	1	1	1	1	1	1	1	1	1	1	1	1	1	-1
1293	146	4	2010	ES	1	1	1	1	1	1	1	1	1	1	1	1	1	1	1	1	1	1	1	1	1	1	1	1	-1
1294	1128	1	2010	ES	1	1	1	1	1	1	1	1	1	1	1	1	1	1	3	1	2	1	1	1	1	1	1	1	-1
1295	1129	1	2010	ES	1	1	1	1	1	1	1	1	1	1	1	1	1	1	3	1	2	1	1	1	1	1	1	1	-1
1296	1130	1	2010	ES	1	1	1	1	1	1	1	1	1	1	1	1	1	1	1	1	1	1	1	1	1	1	1	1	-1
1297	1131	1	2010	ES	1	1	1	1	1	1	1	1	1	1	1	1	1	1	1	1	1	1	1	1	1	1	1	1	-1
1298	1132	1	2010	ES	1	1	1	1	1	1	1	1	1	1	1	1	1	1	3	1	2	1	1	1	1	1	1	1	-1
1299	1133	1	2010	ES	1	1	1	1	1	1	1	1	1	1	1	1	1	1	1	1	1	1	1	1	1	1	1	1	-1
1300	1134	1	2010	ES	1	1	1	1	1	1	1	1	1	1	1	1	1	1	1	1	1	1	1	1	1	1	1	1	-1
1301	1135	1	2010	ES	1	1	1	1	1	1	1	1	1	1	1	1	1	1	1	1	1	1	1	1	1	1	1	1	-1
1302	1136	1	2010	ES	1	1	1	1	1	1	1	1	1	1	1	1	1	1	1	1	1	-1	1	1	1	1	1	1	-1
1303	612	3	2010	ES	1	1	1	1	1	1	1	1	1	1	1	1	1	1	1	1	1	1	1	1	1	1	1	1	-1
1304	1028	2	2010	ES	1	1	1	1	1	1	1	1	1	1	1	1	1	1	3	3	2	1	1	1	1	1	1	1	-1
1305	869	3	2010	ES	1	1	1	1	1	1	1	1	1	1	1	1	1	1	1	1	1	1	1	1	1	1	1	1	-1
1306	862	3	2010	ES	1	1	1	1	1	1	1	1	1	1	1	1	1	1	1	1	1	1	1	1	1	1	1	1	-1
1307	1137	1	2010	ES	1	1	1	1	1	1	1	1	1	1	1	1	1	1	1	1	1	1	1	1	1	1	1	1	-1
1308	861	3	2010	ES	1	1	1	1	1	1	1	1	1	1	1	1	1	1	3	3	2	1	1	3	1	1	1	1	-1
1309	1138	1	2010	ES	1	1	1	1	1	1	1	1	1	1	1	1	1	1	3	3	2	1	1	1	1	1	1	1	-1
1310	197	2	2010	ES	1	1	1	1	1	1	1	1	1	1	1	1	1	1	1	1	1	1	1	1	1	1	1	1	-1
1311	1139	1	2010	ES	1	1	1	1	1	1	1	1	1	1	1	1	1	1	1	1	1	1	1	1	1	1	1	1	-1
1312	1140	1	2010	ES	1	1	1	1	1	1	1	1	1	1	1	1	1	1	1	1	1	1	1	1	1	1	1	1	-1
1313	1141	1	2010	ES	1	1	1	1	1	1	1	1	1	1	1	1	1	1	1	1	1	1	1	1	1	1	1	1	-1
1314	1142	1	2010	ES	1	1	1	1	1	1	1	1	1	1	1	1	1	1	1	1	1	1	1	1	1	1	1	1	-1
1315	1143	1	2010	ES	1	1	1	1	1	1	1	1	1	1	1	1	1	1	1	1	2	1	1	1	1	1	1	1	-1
1316	1144	1	2010	ES	1	1	1	1	1	1	1	1	1	1	1	1	1	1	1	1	1	1	1	1	1	1	1	1	-1
1317	1145	1	2010	ES	1	1	1	1	1	1	1	1	1	1	2	1	1	2	3	1	2	1	1	1	1	1	1	3	-1
1318	867	3	2010	ES	1	1	1	1	1	1	1	1	1	1	1	1	1	1	3	3	2	1	1	1	1	1	4	1	-1
1319	540	3	2010	ES	1	1	1	1	1	1	1	1	1	1	1	1	1	1	1	3	1	1	1	3	1	1	1	1	-1
1320	198	4	2010	ES	1	1	1	1	1	1	1	1	1	1	1	1	1	1	1	3	2	1	1	1	1	1	1	1	-1
1321	199	5	2010	ES	1	1	1	1	1	1	1	1	1	1	1	1	1	1	1	3	2	1	1	1	1	1	1	1	-1
1322	546	3	2010	ES	1	1	1	1	1	1	1	1	1	1	1	1	1	1	3	3	2	1	1	1	1	1	1	1	-1
1323	874	3	2010	ES	1	1	1	1	1	1	1	1	1	1	1	1	1	1	3	1	2	1	1	1	1	1	1	1	-1
1324	1032	2	2010	ES	1	1	1	1	1	1	1	1	1	1	1	1	1	1	1	3	1	1	1	1	1	1	1	1	-1
1325	1033	2	2010	ES	1	1	1	1	1	1	1	1	1	1	2	1	1	1	3	3	2	1	3	1	1	1	1	1	-1
1326	192	4	2010	ES	1	1	1	1	1	1	1	1	1	1	1	1	1	1	1	1	1	1	1	1	1	1	1	1	-1
1327	1146	1	2010	ES	1	1	1	1	1	1	1	1	1	1	1	1	1	1	1	3	1	1	1	1	1	1	1	1	-1
1328	1147	1	2010	ES	2	3	1	1	1	1	1	1	1	1	1	1	1	1	3	1	2	1	1	1	1	1	1	1	-1
1329	1148	1	2010	ES	2	3	1	1	1	1	1	1	1	3	1	1	1	1	1	1	1	1	1	1	1	1	1	1	-1
1330	1149	1	2010	ES	1	1	1	1	1	1	1	1	1	1	1	1	1	1	1	1	1	1	1	1	1	1	1	1	-1
1331	1150	1	2010	ES	1	3	1	1	1	1	1	1	1	2	1	1	1	1	1	1	1	1	1	1	1	1	1	1	1
1332	1151	1	2010	ES	1	1	1	1	1	1	1	1	1	1	1	1	1	1	1	1	1	1	1	1	1	1	1	1	-1
1333	1152	1	2010	ES	1	1	1	1	1	1	1	1	1	1	1	1	1	1	1	1	1	1	1	1	1	1	1	1	-1
1334	1153	1	2010	ES	2	3	1	1	1	1	1	1	1	3	1	1	1	1	3	1	2	1	1	1	1	1	1	1	-1
1335	1154	1	2010	ES	1	1	1	1	1	1	1	1	1	1	1	1	1	1	3	1	2	1	1	1	1	1	1	1	-1
1336	1155	1	2010	ES	1	1	1	1	1	1	1	1	1	1	1	1	3	3	3	3	2	1	1	1	1	1	1	1	-1
1337	1156	1	2010	ES	1	1	1	1	1	1	1	1	1	1	1	1	1	1	3	3	2	1	1	1	1	1	1	1	-1
1338	1157	1	2010	ES	1	1	1	1	1	1	1	1	1	1	1	1	1	3	3	1	2	1	1	1	1	1	1	1	-1
1339	1158	1	2010	ES	1	1	1	1	1	1	1	1	1	1	1	1	3	1	3	3	2	1	1	1	1	1	1	1	-1
1340	1159	1	2010	ES	1	1	1	1	1	1	1	1	1	1	1	1	1	1	1	1	1	1	1	1	1	1	1	1	-1
1341	1160	1	2010	ES	1	1	1	1	1	1	1	1	1	1	1	1	1	1	3	3	2	3	3	1	1	1	1	1	-1
1342	1161	1	2010	PL	1	3	1	1	1	1	1	1	1	3	1	1	3	1	3	3	2	-1	1	1	1	1	2	2	1
1343	1162	1	2010	PL	1	1	1	1	1	1	1	1	1	1	1	1	1	1	3	1	2	-1	1	1	1	1	1	1	-1
1344	1163	1	2010	PL	1	1	1	2	1	1	2	1	1	3	1	1	1	1	3	3	2	1	3	3	1	1	1	1	-1
1345	1164	1	2010	PL	1	1	1	2	1	1	2	1	1	1	1	1	1	1	1	3	2	-1	1	1	1	1	1	1	-1
1346	1165	1	2010	PL	1	1	1	1	1	1	1	1	1	1	2	2	1	2	3	3	2	-1	3	3	1	1	1	1	-1
1347	1166	1	2010	PL	1	1	1	1	1	1	1	1	1	1	1	1	1	1	3	1	2	-1	3	1	1	1	1	1	1
1348	1167	1	2010	PL	1	1	1	1	1	1	1	1	1	1	2	2	1	2	3	1	2	-1	1	1	1	1	1	1	-1
1349	1168	1	2010	PL	1	1	1	1	1	1	1	1	1	1	1	1	1	1	3	1	2	-1	3	1	1	1	1	1	-1
1350	1169	1	2010	PL	1	1	1	1	1	1	1	1	1	1	1	1	1	1	3	3	2	-1	3	1	1	1	1	1	-1
1351	1170	1	2010	PL	1	1	1	1	1	1	1	1	1	1	1	1	1	1	1	1	2	1	3	1	1	1	1	1	-1
1352	1025	3	2011	PT	1	1	1	2	1	1	1	1	1	1	2	1	1	1	1	1	1	1	3	3	1	1	1	1	1
1353	1069	2	2011	PT	1	1	1	2	1	1	1	1	1	1	2	1	1	1	1	1	1	1	3	3	1	1	1	1	1
1354	1070	3	2011	PT	1	1	1	2	1	1	2	1	1	1	2	1	1	1	1	1	1	1	1	3	1	1	1	1	1
1355	1171	1	2011	PT	1	1	1	2	1	1	2	1	1	1	2	1	1	1	1	1	1	1	1	3	1	1	1	1	1
1356	1066	2	2011	PT	1	1	1	2	1	1	2	1	1	1	2	1	1	1	1	1	2	1	3	3	1	1	1	1	-1
1357	909	4	2011	PT	1	1	1	2	1	1	2	1	1	1	2	1	1	1	1	1	1	1	3	3	1	1	1	1	1
1358	1023	3	2011	PT	1	1	1	2	1	1	2	1	1	1	2	1	1	1	1	1	1	1	3	3	1	1	1	1	-1
1359	1067	2	2011	PT	1	1	1	2	1	1	2	1	1	1	2	1	1	1	1	1	1	1	3	3	1	1	1	1	1
1360	1068	2	2011	PT	1	1	1	2	1	1	2	1	1	1	1	1	1	1	1	1	1	1	3	3	1	1	1	1	1
1361	1055	2	2011	PT	1	1	1	2	1	1	2	1	1	1	1	1	1	1	1	1	2	1	1	3	1	1	1	1	-1
1362	1058	2	2011	PT	1	1	1	2	1	1	2	1	1	1	1	1	1	1	1	1	2	1	3	3	1	1	1	1	-1
1363	1057	2	2011	PT	1	1	1	2	1	1	2	1	1	1	1	1	1	1	1	1	2	1	3	3	1	1	1	1	-1
1364	1062	2	2011	PT	1	1	1	2	1	1	2	1	1	1	1	1	1	1	1	1	2	1	3	3	1	1	1	1	-1
1365	1061	2	2011	PT	1	1	1	2	1	1	2	1	1	1	1	1	1	1	1	1	2	1	3	3	1	1	1	1	-1
1366	1060	2	2011	PT	1	1	1	2	1	1	2	1	1	1	1	1	1	1	1	1	2	1	3	3	1	1	1	1	-1
1367	1172	1	2011	PT	1	1	1	2	1	1	2	1	1	1	1	1	1	1	1	1	1	1	1	3	1	1	1	1	-1
1368	1173	1	2011	PT	1	1	1	2	1	1	2	1	1	1	1	1	1	1	1	1	1	1	1	3	1	1	1	1	-1
1369	1174	1	2011	PT	1	1	1	2	1	1	2	1	1	1	1	1	1	1	1	1	2	1	1	3	1	1	1	1	-1
1370	1059	2	2011	PT	1	1	1	2	1	1	2	1	1	1	1	1	1	1	1	1	1	1	1	3	1	1	1	1	-1
1371	884	4	2011	PT	1	1	1	2	1	1	2	1	1	1	1	1	1	1	1	1	2	1	3	3	1	1	1	1	-1
1372	902	4	2011	PT	1	1	1	1	1	1	1	1	1	1	1	1	1	1	1	1	1	1	3	3	1	1	3	3	-1
1373	1064	2	2011	PT	1	1	1	1	1	1	1	1	1	1	1	1	1	1	1	1	1	1	1	3	1	1	1	1	-1
1374	1019	3	2011	PT	1	1	1	2	1	1	2	1	1	1	2	1	1	1	1	1	2	1	3	3	1	1	1	1	-1
1375	1175	1	2011	PT	1	1	1	2	1	1	2	1	1	1	1	1	1	1	1	1	2	1	3	3	1	1	1	1	-1
1376	1176	1	2011	PT	1	1	1	2	1	1	2	1	1	1	1	1	1	1	1	1	2	1	3	3	1	1	1	1	-1
1377	901	3	2011	PT	1	1	1	2	1	1	2	1	1	1	2	1	1	1	1	1	2	1	3	3	1	1	1	1	-1
1378	900	4	2011	PT	1	1	1	2	1	1	2	1	1	1	2	1	1	1	1	1	1	1	3	3	1	1	1	1	-1
1379	1065	2	2011	PT	1	1	1	2	1	1	2	1	1	1	2	1	1	1	1	1	2	1	3	3	1	1	1	1	-1
1380	891	4	2011	PT	1	1	1	1	1	1	1	1	1	1	1	1	1	1	1	1	2	1	1	3	1	1	1	1	-1
1381	897	4	2011	PT	1	1	1	1	1	1	1	1	1	1	1	1	1	1	1	1	1	1	1	3	1	1	1	1	-1
1382	894	4	2011	PT	1	1	1	2	1	1	2	1	1	1	1	1	1	1	1	1	1	1	1	3	1	1	1	1	-1
1383	889	4	2011	PT	1	1	1	2	1	1	2	1	1	1	1	1	1	1	1	1	2	1	1	3	1	1	1	1	-1
1384	890	4	2011	PT	1	1	1	1	1	1	1	1	1	1	1	1	1	1	1	1	1	1	1	3	1	1	1	1	-1
1385	895	4	2011	PT	1	1	1	2	1	1	2	1	1	1	1	1	1	1	1	1	1	1	1	1	1	1	1	1	-1
1386	893	4	2011	PT	1	1	1	2	1	1	2	1	1	1	1	1	1	1	1	1	2	1	1	3	1	1	1	1	-1
1387	896	4	2011	PT	1	1	1	2	1	1	2	1	1	1	1	1	1	1	1	1	1	1	1	3	1	1	1	1	-1
1388	912	4	2011	PT	1	1	1	2	1	1	2	1	1	1	1	1	1	1	1	1	1	1	1	3	1	1	1	1	1
1389	914	4	2011	PT	1	1	1	2	1	1	2	1	1	1	1	1	1	1	1	1	1	1	1	3	1	1	1	1	1
1390	1177	1	2011	PT	1	1	1	2	1	1	2	1	1	1	1	1	1	1	1	1	1	1	1	3	1	1	1	1	1
1391	911	3	2011	PT	1	1	1	2	1	1	2	1	1	1	1	1	1	1	1	1	1	1	1	1	1	1	1	1	1
1392	1072	2	2011	PT	1	1	1	2	1	1	1	1	1	1	1	1	1	1	1	1	1	1	1	1	1	1	1	1	1
1393	1026	3	2011	PT	1	1	1	2	1	1	2	1	1	1	1	1	1	1	1	1	1	1	3	3	1	1	1	1	1
1394	1044	2	2011	RO	1	1	1	1	1	1	1	1	1	1	1	1	1	1	1	1	1	1	3	1	1	1	1	1	-1
1395	1178	1	2011	RO	1	1	1	1	1	1	1	1	1	1	1	1	1	1	1	1	2	1	1	1	1	1	1	1	-1
1396	1179	1	2011	RO	1	1	1	1	1	1	1	1	1	1	1	1	1	1	1	1	1	1	1	1	1	1	1	1	-1
1397	1180	1	2011	RO	1	1	1	1	1	1	1	1	1	1	1	1	1	1	1	1	1	1	1	1	1	1	1	1	-1
1398	1181	1	2011	RO	1	1	1	1	1	1	1	1	1	1	1	1	1	1	1	1	1	1	1	1	1	1	1	1	-1
1399	1182	1	2011	RO	1	1	1	1	1	1	1	1	1	1	1	1	1	1	1	1	2	1	3	1	1	4	1	4	-1
1400	1183	1	2011	RO	1	1	1	1	1	1	1	1	1	1	1	1	1	1	1	1	2	1	1	1	1	4	1	4	-1
1401	1184	1	2011	RO	1	1	1	1	1	1	1	1	1	1	1	1	1	1	3	1	2	1	1	1	1	4	1	4	-1
1402	1185	1	2011	RO	1	1	1	1	1	1	1	1	1	1	1	1	1	1	3	1	2	1	1	1	1	4	1	1	-1
1403	1052	2	2011	RO	1	1	1	1	1	1	1	1	1	1	1	1	1	1	3	1	2	-1	1	1	1	1	1	1	1
1404	1186	1	2011	RO	1	3	1	2	1	1	1	1	1	3	1	1	1	1	3	1	2	1	3	1	1	4	4	4	-1
1405	975	3	2011	RO	1	1	1	1	1	1	1	1	1	1	1	1	1	1	1	1	2	1	1	1	1	1	1	1	-1
1406	967	3	2011	RO	1	1	1	1	1	1	1	1	1	1	1	1	1	1	1	1	1	1	3	1	1	1	1	1	-1
1407	976	3	2011	RO	1	1	1	2	1	1	1	1	1	1	1	1	1	1	3	1	2	1	3	1	1	1	4	4	-1
1408	972	3	2011	RO	1	1	1	1	1	1	1	1	1	1	1	1	1	1	1	1	2	1	3	1	1	1	1	1	-1
1409	864	2	2011	ES	1	1	1	1	1	1	1	1	1	1	1	1	1	1	1	1	1	1	1	1	1	1	1	1	-1
1410	865	2	2011	ES	1	1	1	1	1	1	1	1	1	1	1	1	1	1	1	1	1	1	1	1	1	1	1	1	-1
1411	1140	2	2011	ES	1	1	1	1	1	1	1	1	1	1	1	1	1	1	1	1	1	1	1	1	1	1	1	1	-1
1412	1028	3	2011	ES	1	1	1	1	1	1	1	1	1	3	1	1	1	1	1	3	1	1	1	1	1	1	1	1	-1
1413	1027	2	2011	ES	1	1	1	1	1	1	1	1	1	1	1	1	1	1	1	1	2	1	1	1	1	1	1	1	-1
1414	1187	1	2011	ES	1	1	1	1	1	1	1	1	1	1	1	1	1	1	3	1	2	1	1	1	1	1	1	1	-1
1415	1137	2	2011	ES	1	1	1	1	1	1	1	1	1	1	1	1	1	1	1	1	1	1	1	1	1	1	1	1	-1
1416	861	4	2011	ES	1	1	1	1	1	1	1	1	1	1	1	1	1	1	3	1	2	1	1	1	1	1	1	1	-1
1417	862	4	2011	ES	1	1	1	2	1	1	2	1	1	1	1	1	1	1	3	1	2	1	1	1	1	1	1	1	-1
1418	197	3	2011	ES	1	1	1	1	1	1	1	1	1	1	1	1	1	1	1	1	1	1	1	1	1	1	1	1	-1
1419	1188	1	2011	ES	1	1	1	1	1	1	1	1	1	1	1	1	1	1	1	1	1	1	1	1	1	1	1	1	-1
1420	198	5	2011	ES	1	1	1	1	1	1	1	1	1	1	1	1	1	1	3	1	2	1	1	1	1	1	1	1	-1
1421	540	4	2011	ES	1	1	1	1	1	1	1	1	1	1	1	1	1	1	1	1	1	1	1	1	1	1	1	1	-1
1422	1189	1	2011	ES	1	1	1	1	1	1	1	1	1	1	1	1	1	1	1	1	1	1	1	1	1	1	1	1	-1
1423	1190	1	2011	ES	1	1	1	1	1	1	1	1	1	1	1	1	1	1	3	1	2	1	1	1	1	1	1	1	-1
1424	1141	2	2011	ES	1	1	1	1	1	1	1	1	1	1	1	1	1	1	1	1	1	1	1	1	1	1	1	1	-1
1425	555	4	2011	ES	1	1	1	1	1	1	1	1	1	1	1	1	1	1	1	1	1	1	1	1	1	1	1	1	-1
1426	1191	1	2011	ES	1	1	1	1	1	1	1	1	1	1	1	1	1	1	1	1	1	1	1	1	1	1	1	1	-1
1427	1192	1	2011	ES	1	1	1	1	1	1	1	1	1	1	1	1	1	1	3	3	2	1	1	1	1	1	1	1	-1
1428	163	6	2011	ES	1	1	1	1	1	1	1	1	1	1	1	1	1	1	1	1	1	1	1	1	1	1	1	1	-1
1429	157	5	2011	ES	1	1	1	1	1	1	1	1	1	1	1	1	1	1	1	3	2	1	1	1	1	1	1	1	-1
1430	158	6	2011	ES	1	1	1	1	1	1	1	1	1	1	1	1	1	1	1	1	1	1	1	1	1	1	1	1	-1
1431	1090	2	2011	ES	1	1	1	1	1	1	1	1	1	1	1	1	1	1	3	3	2	1	1	1	1	1	1	1	-1
1432	1087	2	2011	ES	1	1	1	1	1	1	1	1	1	1	1	1	1	1	1	1	1	1	1	1	1	1	1	1	-1
1433	1089	2	2011	ES	1	1	1	1	1	1	1	1	1	1	1	1	1	1	1	1	2	1	1	1	1	1	1	1	-1
1434	1106	2	2011	ES	1	1	1	1	1	1	1	1	1	1	1	1	1	1	1	1	1	1	1	1	1	1	1	1	-1
1435	1088	2	2011	ES	1	1	1	1	1	1	1	1	1	1	1	1	1	1	1	1	2	1	1	1	1	1	1	1	-1
1436	1098	2	2011	ES	1	1	1	1	1	1	1	1	1	1	1	1	1	1	1	1	1	1	1	1	1	1	1	1	-1
1437	165	6	2011	ES	1	1	1	1	1	1	1	1	1	1	1	1	1	1	1	1	1	1	1	1	1	1	1	1	-1
1438	1097	2	2011	ES	1	1	1	1	1	1	1	1	1	1	1	1	1	1	3	1	2	1	1	1	1	1	1	1	-1
1439	1099	2	2011	ES	1	1	1	1	1	1	1	1	1	1	1	1	1	1	1	1	2	1	1	1	1	1	1	1	-1
1440	547	4	2011	ES	1	1	1	1	1	1	1	1	1	1	1	1	1	1	1	1	1	1	1	1	1	1	1	1	-1
1441	1091	2	2011	ES	1	1	1	1	1	1	1	1	1	1	1	1	1	1	1	1	1	1	1	1	1	1	1	1	-1
1442	172	5	2011	ES	1	1	1	1	1	1	1	1	1	1	1	1	1	1	1	1	2	1	1	1	1	1	1	1	-1
1443	1092	2	2011	ES	1	1	1	1	1	1	1	1	1	1	1	1	1	1	1	1	2	1	1	1	1	1	1	1	-1
1444	1107	2	2011	ES	1	1	1	1	1	1	1	1	1	1	1	1	1	1	1	1	1	1	1	1	1	1	1	1	-1
1445	851	4	2011	ES	1	1	1	1	1	1	1	1	1	1	1	1	1	1	1	1	2	1	1	1	1	1	1	4	-1
1446	584	3	2011	ES	1	1	1	1	1	1	1	1	1	1	1	1	1	1	1	3	1	1	1	1	1	1	1	1	1
1447	1093	2	2011	ES	1	1	1	2	1	1	2	1	1	1	1	1	1	1	3	1	2	1	1	3	1	1	1	1	-1
1448	1085	2	2011	ES	1	1	1	1	1	1	1	1	1	1	1	1	1	1	1	1	1	1	1	1	1	1	1	1	-1
1449	856	4	2011	ES	1	1	1	1	1	1	1	1	1	1	1	1	1	1	1	1	2	1	1	1	1	4	1	1	-1
1450	151	6	2011	ES	1	1	1	1	1	1	1	1	1	1	1	1	1	1	1	1	1	1	1	1	1	1	1	1	-1
1451	178	6	2011	ES	1	1	1	1	1	1	1	1	1	1	1	1	1	1	1	1	1	1	1	1	1	1	1	1	-1
1452	181	5	2011	ES	1	1	1	1	1	1	1	1	1	1	1	1	1	1	1	1	1	1	1	1	1	1	1	1	-1
1453	1102	3	2011	ES	1	1	1	1	1	1	1	1	1	1	1	1	1	1	1	1	1	1	1	1	1	1	1	1	-1
1454	154	6	2011	ES	1	1	1	1	1	1	1	1	1	1	1	1	1	1	1	1	1	1	1	1	1	1	1	1	-1
1455	1103	2	2011	ES	1	1	1	1	1	1	1	1	1	1	1	1	1	1	1	1	1	1	1	1	1	1	1	1	-1
1456	153	5	2011	ES	1	1	1	1	1	1	1	1	1	1	1	1	1	1	3	1	2	1	1	1	1	1	1	1	-1
1457	1193	1	2011	ES	1	1	1	1	1	1	1	1	1	1	1	1	1	1	1	3	2	1	1	1	1	1	1	1	-1
1458	573	5	2011	ES	1	1	1	1	1	1	1	1	1	1	1	1	1	1	1	1	1	1	1	1	1	1	1	1	-1
1459	578	5	2011	ES	1	1	1	1	1	1	1	1	1	1	1	1	1	1	1	1	2	1	1	3	1	1	1	1	-1
1460	160	5	2011	ES	1	1	1	1	1	1	1	1	1	1	1	1	1	1	3	1	2	1	1	1	1	1	1	1	-1
1461	855	3	2011	ES	1	1	1	1	1	1	1	1	1	1	1	1	1	1	1	3	1	1	1	1	1	1	1	1	-1
1462	175	6	2011	ES	1	1	1	1	1	1	1	1	1	1	1	1	1	1	1	1	1	1	1	1	1	1	1	1	-1
1463	173	3	2011	ES	1	1	1	1	1	1	1	1	1	1	1	1	1	1	1	3	1	1	1	1	1	1	1	1	-1
1464	174	6	2011	ES	1	1	1	1	1	1	1	1	1	1	1	1	1	1	3	3	2	1	1	1	1	1	1	1	-1
1465	574	5	2011	ES	1	1	1	1	1	1	1	1	1	1	1	1	1	1	3	1	2	3	1	1	1	1	1	1	-1
1466	1094	2	2011	ES	1	1	1	1	1	1	1	1	1	1	1	1	1	1	1	1	1	1	1	1	1	1	1	1	-1
1467	1159	2	2011	ES	1	1	1	1	1	1	1	1	1	1	1	1	1	1	1	1	2	1	1	1	1	1	1	1	-1
1468	1160	2	2011	ES	1	1	1	1	1	1	1	1	1	1	1	1	1	1	3	3	2	1	1	1	1	1	1	1	-1
1469	1157	2	2011	ES	1	1	1	1	1	1	1	1	1	1	1	1	1	1	3	3	2	1	1	1	1	1	1	1	-1
1470	1156	2	2011	ES	1	1	1	1	1	1	1	1	1	1	1	1	1	1	3	3	1	1	1	1	1	1	1	1	-1
1471	1155	2	2011	ES	1	1	1	1	1	1	1	1	1	1	1	1	1	1	3	3	1	1	1	1	1	1	1	1	1
1472	1194	1	2011	ES	1	1	1	1	1	1	1	1	1	1	1	1	1	1	1	1	1	1	1	1	1	1	1	1	-1
1473	1195	1	2011	ES	1	1	1	1	1	1	1	1	1	1	1	1	1	1	1	1	1	1	1	1	1	1	1	1	-1
1474	146	5	2011	ES	1	1	1	1	1	1	1	1	1	1	1	1	1	1	1	1	1	1	1	1	1	1	1	1	-1
1475	1196	1	2011	ES	1	1	1	1	1	1	1	1	1	1	1	1	1	1	1	1	1	1	1	1	1	1	1	1	-1
1476	109	5	2011	ES	1	1	1	1	1	1	1	1	1	1	1	1	1	1	1	1	1	1	1	1	1	1	1	1	-1
1477	110	6	2011	ES	1	1	1	1	1	1	1	1	1	1	1	1	1	1	1	1	1	1	1	1	1	1	1	1	-1
1478	122	6	2011	ES	1	1	1	1	1	1	1	1	1	1	1	1	1	1	1	1	1	1	1	1	1	1	1	1	-1
1479	106	5	2011	ES	1	1	1	1	1	1	1	1	1	1	1	1	1	1	1	1	1	1	1	1	1	1	1	1	-1
1480	1036	3	2011	ES	1	1	1	1	1	1	1	1	1	1	1	1	1	1	3	1	2	1	3	3	1	1	1	1	-1
1481	1197	1	2011	ES	1	1	1	1	1	1	1	1	1	1	1	1	1	1	1	3	1	1	1	1	1	1	1	1	-1
1482	1198	1	2011	ES	1	3	1	1	1	1	1	1	1	3	1	1	3	1	3	3	2	1	1	1	1	1	1	1	-1
1483	108	3	2011	ES	1	1	1	1	1	1	1	1	1	1	1	1	1	1	1	1	1	1	1	1	1	1	1	1	-1
1484	1199	1	2011	ES	1	1	1	1	1	1	1	1	1	1	1	1	1	1	1	1	1	1	1	1	1	1	4	1	-1
1485	1200	1	2011	ES	1	1	1	1	1	1	1	1	1	1	1	1	1	1	1	1	1	1	1	1	1	1	1	1	-1
1486	1201	1	2011	ES	1	1	1	1	1	1	1	1	1	1	1	1	1	1	3	1	2	1	1	1	1	1	1	1	-1
1487	1202	1	2011	ES	1	1	1	1	1	1	1	1	1	1	1	1	1	1	1	1	1	1	1	1	1	1	1	1	-1
1488	1203	1	2011	ES	1	1	1	1	1	1	1	1	1	1	1	1	1	1	1	1	1	1	1	1	1	1	1	1	-1
1489	612	4	2011	ES	1	1	1	1	1	1	1	1	1	1	1	1	1	1	1	1	1	1	1	1	1	1	1	1	-1
1490	1134	2	2011	ES	1	1	1	1	1	1	1	1	1	1	1	1	1	1	3	1	2	1	1	1	1	1	1	1	-1
1491	1204	1	2011	ES	1	1	1	1	1	1	1	1	1	1	1	1	1	1	3	1	2	1	1	1	1	1	1	1	-1
1492	1205	1	2011	ES	1	1	1	1	1	1	1	1	1	1	1	1	1	1	1	3	1	1	1	1	1	1	1	1	-1
1493	121	2	2011	ES	1	1	1	1	1	1	1	1	1	1	1	1	1	1	1	1	1	1	1	1	1	1	1	1	-1
1494	619	4	2011	ES	1	1	1	2	1	1	2	1	1	1	1	1	1	1	3	3	2	3	1	1	1	1	1	1	-1
1495	1206	1	2011	ES	1	1	1	1	1	1	1	1	1	1	1	1	1	1	1	1	1	1	1	1	1	1	1	1	-1
1496	1104	2	2011	ES	1	1	1	1	1	1	1	1	1	1	1	1	1	1	3	3	2	3	1	1	1	1	1	1	-1
1497	101	4	2011	ES	1	1	1	1	1	1	1	1	1	1	1	1	1	1	3	1	2	3	1	1	1	1	1	1	-1
1498	103	5	2011	ES	1	1	1	1	1	1	1	1	1	1	1	1	1	1	3	3	2	3	1	1	1	1	1	1	-1
1499	102	6	2011	ES	1	1	1	1	1	1	1	1	1	1	1	1	1	1	3	3	2	3	1	1	1	1	1	1	-1
1500	1121	2	2011	ES	1	1	1	1	1	1	1	1	1	1	1	1	1	1	3	3	2	1	1	1	1	1	1	1	-1
1501	1207	1	2011	ES	1	1	1	1	1	1	1	1	1	1	1	1	1	1	1	1	1	1	1	1	1	1	1	1	-1
1502	605	4	2011	ES	1	1	1	1	1	1	1	1	1	1	1	1	1	1	1	1	1	1	1	1	1	1	1	1	-1
1503	137	3	2011	ES	1	1	1	1	1	1	1	1	1	1	1	1	1	1	1	1	1	1	1	1	1	1	1	1	-1
1504	100	5	2011	ES	1	1	1	2	1	1	2	1	1	1	1	1	1	1	3	3	2	3	1	1	1	1	1	1	-1
1505	847	2	2011	ES	1	1	1	1	1	1	1	1	1	1	1	1	1	1	1	1	1	1	1	1	1	1	1	1	-1
1506	138	4	2011	ES	1	1	1	1	1	1	1	1	1	1	1	1	1	1	1	1	1	1	1	1	1	1	1	1	-1
1507	140	3	2011	ES	1	1	1	1	1	1	1	1	1	1	1	1	1	1	3	1	2	1	1	1	1	1	1	1	-1
1508	618	4	2011	ES	1	1	1	1	1	1	1	1	1	1	1	1	1	1	1	1	2	1	3	1	1	1	1	1	-1
1509	617	4	2011	ES	1	1	1	1	1	1	1	1	1	1	1	1	1	1	1	1	1	1	1	1	1	1	1	1	-1
1510	1208	1	2011	ES	1	1	1	1	1	1	1	1	1	1	1	1	1	1	1	1	1	1	1	1	1	1	1	1	-1
1511	1209	1	2011	ES	1	1	1	1	1	1	1	1	1	1	1	1	1	1	1	1	1	1	1	1	1	1	1	1	-1
1512	1210	1	2011	ES	1	1	1	1	1	1	1	1	1	1	1	1	1	1	1	1	1	1	1	1	1	1	1	1	-1
1513	1039	2	2011	ES	1	1	1	1	1	1	1	1	1	1	1	1	1	1	3	1	2	3	1	1	1	1	1	1	-1
1514	1126	2	2011	ES	1	1	1	1	1	1	1	1	1	1	1	1	1	1	3	1	2	1	1	1	1	1	1	1	-1
1515	1211	1	2011	ES	1	1	1	1	1	1	1	1	1	1	1	1	1	1	3	1	2	3	1	1	1	1	1	1	-1
1516	1212	1	2011	ES	1	1	1	1	1	1	1	1	1	1	1	1	1	1	1	1	1	1	1	1	1	1	1	1	-1
1517	1113	2	2011	ES	1	1	1	1	1	1	1	1	1	1	1	1	1	1	1	1	1	1	1	1	1	1	1	1	-1
1518	1115	2	2011	ES	1	1	1	1	1	1	1	1	1	1	1	1	1	1	1	1	1	1	1	1	1	1	1	1	-1
1519	1213	1	2011	ES	1	1	1	1	1	1	1	1	1	1	1	1	1	1	3	1	2	1	1	1	1	1	1	1	-1
1520	1127	2	2011	ES	1	1	1	1	1	1	1	1	1	1	1	1	1	1	3	1	2	3	1	1	1	1	1	1	-1
1521	1119	2	2011	ES	1	1	1	1	1	1	1	1	1	1	1	1	1	1	1	1	1	1	1	1	1	1	1	1	-1
1522	135	5	2011	ES	1	1	1	1	1	1	1	1	1	1	1	1	1	1	1	1	1	1	1	1	1	1	1	1	-1
1523	585	5	2011	ES	1	1	1	2	1	1	2	1	1	1	1	1	1	1	3	1	2	1	1	1	1	1	1	1	-1
1524	1214	1	2011	ES	1	1	1	1	1	1	1	1	1	1	1	1	1	1	1	1	1	1	1	1	1	1	1	1	-1
1525	1120	2	2011	ES	1	1	1	2	1	1	2	1	1	1	1	1	1	1	3	3	2	1	1	1	1	1	1	1	-1
1526	598	5	2011	ES	1	1	1	1	1	1	1	1	1	1	1	1	1	1	1	1	1	1	1	1	1	1	1	1	-1
1527	1122	2	2011	ES	1	1	1	1	1	1	1	1	1	1	1	1	1	1	1	1	1	1	1	1	1	1	1	1	-1
1528	597	5	2011	ES	1	1	1	1	1	1	1	1	1	1	1	1	1	1	1	1	1	1	1	1	1	1	1	1	-1
1529	1125	2	2011	ES	1	1	1	1	1	1	1	1	1	1	1	1	1	1	3	1	2	1	1	1	1	1	1	1	-1
1530	1215	1	2011	ES	1	1	1	1	1	1	1	1	1	1	1	1	1	1	3	1	2	1	1	1	1	1	1	1	-1
1531	586	3	2011	ES	1	1	1	1	1	1	1	1	1	1	1	1	1	1	1	1	1	1	1	1	1	1	1	1	-1
1532	1109	2	2011	ES	1	1	1	1	1	1	1	1	1	1	1	1	1	1	1	1	1	1	1	1	1	1	1	1	-1
1533	845	3	2011	ES	1	1	1	1	1	1	1	1	1	1	1	1	1	1	1	1	1	1	1	1	1	1	1	1	-1
1534	1216	1	2011	ES	1	1	1	1	1	1	1	1	1	1	1	1	1	1	3	1	2	1	1	1	1	1	1	1	-1
1535	1116	2	2011	ES	1	1	1	1	1	1	1	1	1	1	1	1	1	1	1	1	1	1	1	1	1	1	1	1	-1
1536	1217	1	2011	ES	1	1	1	1	1	1	1	1	1	1	1	1	1	1	1	1	1	1	1	1	1	1	1	1	-1
1537	1124	2	2011	ES	1	1	1	1	1	1	1	1	1	1	1	1	1	1	3	1	2	3	1	1	1	1	1	1	-1
1538	846	3	2011	ES	1	1	1	1	1	1	1	1	1	1	1	1	1	1	1	1	1	1	1	1	1	1	1	1	-1
1539	104	4	2011	ES	1	1	1	1	1	1	1	1	1	1	1	1	1	1	1	1	1	1	1	1	1	1	1	1	-1
1540	599	5	2011	ES	1	1	1	1	1	1	1	1	1	1	1	1	1	1	1	1	1	1	1	1	1	1	1	1	-1
1541	1218	1	2011	ES	1	1	1	1	1	1	1	1	1	1	1	1	1	1	3	1	2	1	1	1	1	1	1	1	-1
1542	1154	2	2011	ES	1	1	1	1	1	1	1	1	1	1	1	1	1	1	1	1	1	1	1	1	1	1	1	4	-1
1543	1152	2	2011	ES	1	1	1	1	1	1	1	1	1	1	1	1	1	1	1	1	1	1	1	1	1	1	1	1	-1
1544	1148	2	2011	ES	1	1	1	1	1	1	1	1	1	1	1	1	1	1	1	1	1	1	1	1	1	1	1	1	-1
1545	1219	1	2011	ES	1	1	1	1	1	1	1	1	1	1	1	1	1	1	1	1	1	1	1	1	1	1	1	1	-1
1546	1220	1	2011	ES	1	1	1	1	1	1	1	1	1	1	1	1	1	1	1	1	1	1	1	1	1	1	1	1	-1
1547	1153	2	2011	ES	1	1	1	1	1	1	1	1	1	1	1	1	1	1	3	1	1	1	1	1	1	1	1	1	-1
1548	1150	2	2011	ES	1	1	1	1	1	1	1	1	1	1	1	1	1	1	3	1	2	1	1	1	1	1	1	1	-1
1549	1151	2	2011	ES	1	1	1	1	1	1	1	1	1	1	1	1	1	1	1	1	1	1	1	1	1	1	1	1	-1
1550	192	5	2011	ES	1	1	1	1	1	1	1	1	1	1	1	1	1	1	3	1	2	3	1	1	1	1	1	1	-1
1551	189	4	2011	ES	1	1	1	1	1	1	1	1	1	1	1	1	1	1	1	1	1	1	1	1	1	1	1	1	-1
1552	1221	1	2011	ES	1	1	1	1	1	1	1	1	1	1	1	1	1	1	1	1	2	1	1	1	1	4	1	1	-1
1553	1222	1	2011	ES	1	1	1	1	1	1	1	1	1	1	1	1	1	1	1	1	2	1	1	1	1	1	1	1	-1
1554	1223	1	2011	ES	1	1	1	1	1	1	1	1	1	1	1	1	1	1	1	1	2	1	1	1	1	1	1	1	-1
1555	1224	1	2011	ES	1	1	1	1	1	1	1	1	1	1	1	1	1	1	1	1	1	1	1	1	1	1	1	1	-1
1556	1225	1	2011	ES	1	1	1	1	1	1	1	1	1	1	1	1	3	1	1	3	1	1	1	1	1	1	1	1	-1
1557	1226	1	2011	ES	1	1	1	1	1	1	1	1	1	1	1	1	1	1	1	1	1	1	1	1	1	1	1	1	-1
1558	1227	1	2011	ES	1	1	1	1	1	1	1	1	1	1	1	1	1	1	1	1	1	1	1	1	1	1	1	1	-1
1559	1228	1	2011	SK	1	3	1	1	1	1	1	1	1	3	1	1	1	1	1	1	2	3	3	3	1	1	1	1	-1
1560	318	5	2011	SK	1	1	1	1	1	1	1	1	1	1	1	1	1	1	3	1	1	3	1	1	1	1	1	1	1
1561	738	5	2011	SK	1	1	1	1	1	1	1	1	1	1	1	1	1	3	3	3	2	1	1	1	1	1	1	1	1
1562	764	4	2011	CZ	1	2	1	2	1	1	2	1	1	2	1	1	1	1	3	1	2	3	3	1	1	1	1	1	-1
1563	326	6	2011	CZ	1	1	1	1	1	1	1	1	1	1	1	1	3	3	1	3	2	1	3	1	1	1	1	1	1
1564	1081	2	2011	CZ	1	2	1	2	1	1	2	1	1	3	1	2	1	1	1	1	2	1	1	1	1	1	1	1	1
1565	999	3	2011	CZ	1	2	1	2	1	1	2	1	1	1	1	1	1	1	3	1	2	1	1	1	1	1	1	1	-1
1566	814	3	2011	CZ	1	1	1	1	1	1	1	1	1	1	1	1	1	1	1	1	2	-1	3	1	1	1	1	1	2
1567	1229	1	2011	CZ	1	3	1	1	1	1	1	1	1	1	1	1	1	1	1	1	2	-1	3	1	1	1	1	1	1
1568	324	5	2011	CZ	1	1	1	2	1	1	2	1	1	3	1	1	1	1	1	1	1	3	1	1	1	2	1	1	1
1569	991	3	2011	CZ	1	1	1	1	1	1	1	1	1	1	1	1	1	1	1	1	2	1	3	1	1	4	4	4	3
1570	1230	1	2011	CZ	1	1	1	1	1	1	1	1	1	1	1	1	1	1	1	1	1	1	1	1	1	1	1	1	-1
1571	1231	1	2011	CZ	1	1	1	2	1	1	2	1	1	1	1	1	1	1	1	1	2	1	3	1	1	1	1	1	3
1572	1248	1	2011	CZ	1	1	1	2	1	1	2	1	1	1	1	1	1	1	1	1	2	1	1	1	1	1	4	4	3
1573	344	4	2011	CZ	1	1	1	1	1	1	1	1	1	1	1	1	1	1	1	1	1	1	1	1	1	1	4	4	3
1574	747	5	2011	CZ	1	1	1	2	1	1	2	1	1	3	1	1	1	1	3	3	2	1	3	1	1	3	1	1	2
1575	1232	1	2011	CZ	1	1	1	1	1	1	1	1	1	1	1	1	1	1	1	1	1	1	3	1	1	1	4	4	1
1576	746	5	2011	CZ	1	1	1	1	1	1	1	1	1	1	1	1	1	1	1	1	1	1	1	1	1	1	1	1	1
1577	806	4	2011	CZ	1	1	1	1	1	1	1	1	1	1	1	1	1	1	3	1	2	1	3	3	1	1	1	1	1
1578	1233	1	2011	CZ	1	1	1	1	1	1	1	1	1	1	1	1	1	1	1	1	2	-1	3	1	1	1	1	1	2
1579	1075	2	2011	CZ	2	1	1	2	1	1	2	1	1	1	1	1	1	1	1	1	1	1	3	1	1	4	1	1	1
1580	751	5	2011	CZ	1	1	1	2	1	1	2	1	1	3	1	1	1	1	1	1	1	1	1	1	1	1	1	1	1
1581	1006	3	2011	CZ	1	1	1	2	1	1	2	1	1	1	1	1	1	1	3	1	1	1	3	1	1	1	4	4	1
1582	1234	1	2011	CZ	1	1	1	1	1	1	1	1	1	1	1	1	1	1	1	1	2	1	1	1	1	1	1	1	-1
1583	1079	2	2011	CZ	1	1	1	1	1	1	1	1	1	3	1	1	1	1	1	1	1	1	3	1	1	4	4	1	-1
1584	1235	1	2011	CZ	2	1	1	2	1	1	2	1	1	1	1	1	1	1	1	1	2	1	3	1	1	1	1	1	2
1585	1074	2	2011	CZ	1	1	1	1	1	1	1	1	1	1	1	1	1	1	3	1	2	1	3	1	1	1	1	1	1
1586	1078	2	2011	CZ	1	1	1	1	1	1	1	1	1	1	1	1	1	1	1	1	2	1	3	1	1	1	1	1	1
1587	798	4	2011	CZ	1	1	1	2	1	1	2	1	1	1	1	1	1	1	1	1	1	1	3	1	1	4	1	1	3
1588	347	3	2011	CZ	1	1	1	2	1	1	2	1	1	1	1	1	1	1	1	1	2	1	3	1	1	4	4	1	-1
1589	345	6	2011	CZ	1	1	1	2	1	1	2	1	1	1	1	1	1	1	1	3	2	3	3	1	1	1	1	1	-1
1590	1010	2	2011	CZ	1	1	1	2	1	1	2	1	1	1	1	1	1	1	1	1	2	1	1	1	1	1	1	1	1
1591	1249	1	2011	PL	1	1	1	1	1	1	1	1	1	1	2	1	3	2	3	3	1	1	1	1	1	4	1	1	-1
1592	1250	1	2011	PL	1	1	1	1	1	1	1	1	1	1	1	1	1	1	1	1	2	1	1	1	1	1	1	1	1
1593	1251	1	2011	PL	1	1	1	2	1	1	2	1	1	1	1	1	1	1	1	1	1	1	1	1	1	4	1	1	-1
1594	1165	2	2011	PL	1	1	1	1	1	1	1	1	1	1	1	1	1	1	1	3	1	1	1	1	1	1	1	2	-1
1595	1252	1	2011	PL	1	1	1	1	1	1	1	1	1	1	1	1	1	1	1	1	1	1	1	1	1	1	1	1	-1
1596	1166	2	2011	PL	1	1	1	1	1	1	1	1	1	1	1	1	1	1	1	1	1	1	1	1	1	1	1	1	-1
1597	1253	1	2011	PL	1	1	1	1	1	1	1	1	1	1	1	1	1	1	1	1	1	1	1	1	1	1	1	1	1
1598	1163	2	2011	PL	1	1	1	2	1	1	2	1	1	3	2	2	3	2	3	3	1	1	1	1	1	3	1	1	-1
1599	1161	2	2011	PL	1	1	1	1	1	1	1	1	1	3	1	1	1	1	3	3	2	1	1	1	1	1	1	1	1
1600	1254	1	2011	PL	1	1	1	1	1	1	1	1	1	1	1	1	1	1	1	1	1	1	1	1	1	1	1	1	-1
1601	738	6	2012	SK	1	1	1	1	1	1	1	1	1	1	1	1	1	3	3	3	2	1	1	1	1	1	1	1	1
1602	1002	3	2012	CZ	1	1	1	1	1	1	1	1	1	1	1	1	1	1	1	1	1	1	1	1	1	4	4	4	1
1603	746	6	2012	CZ	1	1	1	1	1	1	1	1	1	1	1	1	1	1	1	1	1	1	1	1	1	1	1	1	1
1604	806	5	2012	CZ	1	1	1	1	1	1	1	1	1	1	1	1	1	1	3	1	2	1	3	3	1	1	1	1	1
1605	1075	3	2012	CZ	1	1	1	1	1	1	1	1	1	1	1	1	1	1	1	1	1	-1	1	1	1	1	1	1	1
1606	1074	3	2012	CZ	1	1	1	1	1	1	1	1	1	1	1	1	1	1	1	1	1	1	1	1	1	1	1	1	1
1607	1235	2	2012	CZ	2	1	1	2	1	1	2	1	1	1	1	1	1	1	1	1	2	-1	3	1	1	1	1	1	2
1608	1010	3	2012	CZ	1	1	1	2	1	1	2	1	1	1	1	1	1	1	1	1	2	-1	1	1	1	1	1	1	3
1609	1079	3	2012	CZ	1	1	1	1	1	1	1	1	1	1	1	1	1	1	1	1	1	-1	3	1	1	4	4	1	-1
1610	344	5	2012	CZ	1	1	1	1	1	1	1	1	1	1	1	1	1	1	1	1	1	-1	3	1	1	1	4	4	3
1611	345	7	2012	CZ	1	1	1	2	1	1	2	1	1	1	1	1	1	1	1	3	2	-1	3	1	1	1	1	1	-1
1612	1234	2	2012	CZ	1	1	1	1	1	1	1	1	1	1	1	1	1	1	1	1	1	-1	1	1	1	1	1	1	-1
1613	2166	1	2012	CZ	1	1	1	1	1	1	1	1	1	1	1	1	1	1	1	1	2	1	3	1	1	1	1	1	3
1614	326	7	2012	CZ	1	1	1	1	1	1	1	1	1	3	1	1	3	3	3	3	2	1	3	1	1	1	1	1	2
1615	1081	3	2012	CZ	1	3	1	2	1	1	2	1	1	3	1	1	1	1	1	1	2	1	1	1	1	1	1	1	1
1616	999	4	2012	CZ	1	1	1	1	1	1	1	1	1	1	1	1	1	1	1	1	1	1	1	1	1	1	1	1	-1
1617	814	4	2012	CZ	1	1	1	1	1	1	1	1	1	1	1	1	1	1	1	1	2	1	1	1	1	1	1	1	2
1618	992	3	2012	CZ	1	1	1	2	1	1	2	1	1	1	1	1	1	1	3	3	2	-1	3	1	1	1	1	1	1
1619	996	3	2012	CZ	1	1	1	2	1	1	2	1	1	1	1	1	1	1	3	3	2	-1	3	1	1	1	1	1	1
1620	324	6	2012	CZ	1	1	1	2	1	1	2	1	1	1	1	1	1	1	3	3	2	-1	3	1	1	1	1	1	1
1621	991	4	2012	CZ	1	1	1	2	1	1	2	1	1	1	1	1	1	1	3	3	2	-1	3	1	1	1	1	1	1
1622	819	2	2012	CZ	1	1	1	1	1	1	1	1	1	1	1	1	1	1	1	1	3	1	1	3	1	1	4	1	-1
1623	751	6	2012	CZ	2	1	1	2	1	1	2	1	1	1	1	1	1	1	1	1	1	1	1	1	1	1	1	1	1
1624	1054	2	2012	RO	1	3	1	1	1	1	1	1	1	3	1	1	1	1	3	1	2	1	3	1	1	1	1	1	-1
1625	1236	1	2012	RO	1	1	1	1	1	1	1	1	1	1	1	1	1	1	3	1	2	1	3	1	1	4	4	4	-1
1626	977	3	2012	RO	1	1	1	1	1	1	1	1	1	1	1	1	1	1	3	1	2	1	3	1	1	4	4	4	-1
1627	976	4	2012	RO	1	1	1	1	1	1	1	1	1	1	1	1	1	1	3	1	2	-1	3	1	1	1	1	1	-1
1628	1044	3	2012	RO	1	1	1	1	1	1	1	1	1	1	1	1	1	1	1	1	1	1	1	1	1	4	1	1	-1
1629	1237	1	2012	RO	1	1	1	1	1	1	1	1	1	1	1	1	1	1	1	1	2	1	1	1	1	1	1	1	-1
1630	1238	1	2012	RO	1	1	1	1	1	1	1	1	1	1	1	1	1	1	1	1	2	1	1	1	1	1	1	1	-1
1631	1239	1	2012	RO	1	1	1	1	1	1	1	1	1	1	1	1	1	1	3	1	2	1	3	1	1	4	1	1	-1
1632	980	3	2012	RO	1	1	1	1	1	1	1	1	1	1	1	1	1	1	1	1	2	1	3	1	1	4	4	4	-1
1633	1045	2	2012	RO	1	1	1	1	1	1	1	1	1	1	1	1	1	1	3	1	2	1	1	1	1	4	4	4	-1
1634	20001	1	2012	ES	1	1	1	1	1	1	1	1	1	1	1	1	1	1	3	1	2	1	1	1	1	1	1	1	-1
1635	20002	1	2012	ES	1	1	1	1	1	1	1	1	1	1	1	1	1	1	1	1	1	1	1	1	1	1	1	1	-1
1636	138	5	2012	ES	1	1	1	1	1	1	1	1	1	1	1	1	1	1	3	1	2	1	1	1	1	1	1	1	-1
1637	605	5	2012	ES	1	1	1	1	1	1	1	1	1	1	1	1	1	1	3	1	2	1	1	1	1	1	1	1	-1
1638	1208	2	2012	ES	1	1	1	1	1	1	1	1	1	1	1	1	1	1	1	1	1	1	1	1	1	1	1	1	-1
1639	1210	2	2012	ES	1	1	1	1	1	1	1	1	1	1	1	1	1	1	1	1	1	1	1	1	1	1	1	1	-1
1640	20007	1	2012	ES	1	1	1	1	1	1	1	1	1	1	1	1	1	1	1	1	1	1	1	1	1	1	1	1	-1
1641	600	3	2012	ES	1	1	1	1	1	1	1	1	1	1	1	1	1	1	1	1	1	1	1	1	1	1	1	1	-1
1642	597	6	2012	ES	1	1	1	1	1	1	1	1	1	1	1	1	1	1	1	1	1	1	1	1	1	1	1	1	-1
1643	20010	1	2012	ES	1	1	1	1	1	1	1	1	1	1	1	1	1	1	1	1	1	1	1	1	1	1	1	1	-1
1644	20011	1	2012	ES	1	1	1	1	1	1	1	1	1	1	1	1	1	1	1	1	1	1	1	1	1	1	1	1	-1
1645	20012	1	2012	ES	1	1	1	1	1	1	1	1	1	1	1	1	1	1	1	1	1	1	1	1	1	1	1	1	-1
1646	1212	2	2012	ES	1	1	1	1	1	1	1	1	1	1	1	1	1	1	1	1	2	1	1	1	1	1	1	1	-1
1647	1126	3	2012	ES	1	1	1	1	1	1	1	1	1	1	1	1	1	1	3	1	2	1	1	1	1	1	1	1	-1
1648	1213	2	2012	ES	1	1	1	1	1	1	1	1	1	1	1	1	1	1	3	1	2	1	1	1	1	1	1	1	-1
1649	1122	3	2012	ES	1	1	1	1	1	1	1	1	1	1	1	1	1	1	1	1	1	1	1	1	1	1	1	1	-1
1650	10098	1	2012	ES	1	1	1	1	1	1	1	1	1	1	1	1	1	1	1	3	2	1	1	1	1	1	1	1	-1
1651	1127	3	2012	ES	1	1	1	1	1	1	1	1	1	1	1	1	1	1	3	3	2	3	1	1	1	1	1	1	-1
1652	20019	1	2012	ES	1	1	1	1	1	1	1	1	1	1	1	1	1	1	1	1	1	1	1	1	1	1	1	1	-1
1653	10052	1	2012	ES	1	1	1	1	1	1	1	1	1	1	1	1	1	1	1	1	1	1	1	1	1	1	1	1	-1
1654	10078	1	2012	ES	1	1	1	1	1	1	1	1	1	1	1	1	1	1	1	1	1	1	1	1	1	1	1	1	-1
1655	1113	3	2012	ES	1	1	1	1	1	1	1	1	1	1	1	1	1	1	1	1	1	1	1	1	1	1	1	1	-1
1656	20025	2	2012	ES	1	1	1	1	1	1	1	1	1	1	1	1	1	1	1	1	1	1	1	1	1	1	1	1	-1
1657	20024	1	2012	ES	1	1	1	1	1	1	1	1	1	1	1	1	1	1	1	3	2	1	1	1	1	1	1	1	-1
1658	20025	1	2012	ES	1	1	1	1	1	1	1	1	1	1	1	1	1	1	1	1	1	1	1	1	1	1	1	1	-1
1659	20026	1	2012	ES	1	1	1	1	1	1	1	1	1	1	1	1	1	1	1	3	2	1	1	1	1	1	1	1	-1
1660	585	6	2012	ES	1	1	1	1	1	1	1	1	1	1	1	1	1	1	1	1	1	1	1	1	1	1	1	1	-1
1661	104	5	2012	ES	1	1	1	1	1	1	1	1	1	1	1	1	1	1	1	1	1	1	1	1	1	1	1	1	-1
1662	10054	1	2012	ES	1	1	1	1	1	1	1	1	1	1	1	1	1	1	1	1	1	1	1	1	1	1	1	1	-1
1663	103	6	2012	ES	1	1	1	1	1	1	1	1	1	1	1	1	1	1	1	1	1	1	1	1	1	1	1	1	-1
1664	20031	1	2012	ES	1	1	1	1	1	1	1	1	1	1	1	1	1	1	3	1	2	1	1	1	1	1	1	1	-1
1665	101	5	2012	ES	1	1	1	1	1	1	1	1	1	1	1	1	1	1	3	1	2	1	1	1	1	1	1	1	-1
1666	102	7	2012	ES	1	1	1	1	1	1	1	1	1	1	1	1	1	1	3	1	1	1	1	1	1	1	1	1	-1
1667	10080	1	2012	ES	1	1	1	1	1	1	1	1	1	1	1	1	1	1	1	1	1	1	3	1	1	1	1	1	-1
1668	598	6	2012	ES	1	1	1	1	1	1	1	1	1	1	1	1	1	1	1	1	1	1	1	1	1	1	1	1	-1
1669	20036	1	2012	ES	1	1	1	1	1	1	1	1	1	1	1	1	1	1	1	1	1	1	1	1	1	1	1	1	-1
1670	10086	1	2012	ES	1	1	1	1	1	1	1	1	1	1	1	1	1	1	3	1	2	1	1	1	1	1	1	1	-1
1671	109	6	2012	ES	1	1	1	1	1	1	1	1	1	1	1	1	1	1	1	1	1	1	1	1	1	1	1	1	-1
1672	106	6	2012	ES	1	1	1	1	1	1	1	1	1	1	1	1	1	1	1	1	1	1	1	1	1	1	1	1	-1
1673	20040	1	2012	ES	1	1	1	1	1	1	1	1	1	1	1	1	1	1	1	1	1	1	1	1	1	1	1	1	-1
1674	124	5	2012	ES	1	1	1	1	1	1	1	1	1	1	1	1	1	1	1	1	1	1	1	1	1	1	1	1	-1
1675	20042	1	2012	ES	1	1	1	1	1	1	1	1	1	1	1	1	1	1	1	1	1	1	1	1	1	1	1	1	-1
1676	20043	1	2012	ES	1	1	1	1	1	1	1	1	1	1	1	1	1	1	1	1	1	1	1	1	1	1	1	1	-1
1677	10029	1	2012	ES	1	1	1	1	1	1	1	1	1	1	1	1	1	1	3	1	2	1	1	1	1	1	1	1	-1
1678	20045	1	2012	ES	1	1	1	1	1	1	1	1	1	1	1	1	1	1	1	1	1	1	1	1	1	1	1	1	-1
1679	20046	1	2012	ES	1	1	1	1	1	1	1	1	1	1	1	1	1	1	1	1	1	1	1	1	1	1	1	1	-1
1680	20047	1	2012	ES	1	1	1	1	1	1	1	1	1	1	1	1	1	1	1	1	1	1	1	1	1	1	1	1	-1
1681	20048	1	2012	ES	1	1	1	1	1	1	1	1	1	1	1	1	1	1	3	1	2	1	1	1	1	1	1	1	-1
1682	122	7	2012	ES	1	1	1	1	1	1	1	1	1	1	1	1	1	1	1	1	2	1	1	1	1	1	1	1	-1
1683	20050	1	2012	ES	1	1	1	1	1	1	1	1	1	1	1	1	1	1	3	1	2	1	1	1	1	1	1	1	-1
1684	20051	1	2012	ES	1	1	1	1	1	1	1	1	1	1	1	1	1	1	3	1	2	1	1	3	1	1	1	1	-1
1685	10006	1	2012	ES	1	1	1	1	1	1	1	1	1	1	1	1	1	1	3	1	2	1	1	1	1	1	1	1	-1
1686	20053	1	2012	ES	1	1	1	1	1	1	1	1	1	1	1	1	1	1	1	1	1	1	1	1	1	1	1	1	-1
1687	141	6	2012	ES	1	1	1	1	1	1	1	1	1	1	1	1	1	1	1	1	1	1	1	1	1	1	1	1	-1
1688	145	5	2012	ES	1	1	1	1	1	1	1	1	1	1	1	1	1	1	3	1	2	1	3	1	1	1	1	3	-1
1689	146	6	2012	ES	1	1	1	1	1	1	1	1	1	1	1	1	1	1	1	1	1	1	1	1	1	1	1	1	-1
1690	20057	1	2012	ES	1	1	1	1	1	1	1	1	1	1	1	1	1	1	3	1	2	1	1	1	1	1	1	1	-1
1691	20058	1	2012	ES	1	1	1	1	1	1	1	1	1	1	1	1	1	1	3	1	2	1	3	3	1	1	1	1	-1
1692	20059	1	2012	ES	1	1	1	1	1	1	1	1	1	1	1	1	1	1	3	1	2	1	1	1	1	1	1	1	-1
1693	20060	1	2012	ES	1	1	1	1	1	1	1	1	1	1	1	1	1	1	1	1	1	1	1	1	1	1	1	1	-1
1694	10010	1	2012	ES	1	1	1	1	1	1	1	1	1	1	1	1	1	1	3	1	2	1	1	1	1	1	1	1	-1
1695	125	5	2012	ES	1	1	1	1	1	1	1	1	1	1	1	1	1	1	1	1	1	1	1	1	1	1	1	1	-1
1696	10015	1	2012	ES	1	1	1	1	1	1	1	1	1	1	1	1	1	1	1	1	2	1	1	1	1	1	1	1	-1
1697	20064	1	2012	ES	1	1	1	1	1	1	1	1	1	1	1	1	1	1	3	3	2	1	1	1	1	1	1	1	-1
1698	1156	3	2012	ES	1	1	1	1	1	1	1	1	1	1	1	1	1	1	3	3	2	1	1	1	1	1	1	1	-1
1699	1159	3	2012	ES	1	1	1	1	1	1	1	1	1	1	1	1	1	1	1	1	1	1	1	1	1	1	1	1	-1
1700	1194	2	2012	ES	1	1	1	1	1	1	1	1	1	1	1	1	1	1	3	1	2	1	1	1	1	1	1	1	-1
1701	1157	3	2012	ES	1	1	1	1	1	1	1	1	1	1	1	1	1	1	3	1	2	1	1	1	1	1	1	1	-1
1702	20069	1	2012	ES	1	1	1	1	1	1	1	1	1	1	1	1	1	1	1	1	1	1	1	1	1	1	1	1	-1
1703	10035	1	2012	ES	1	1	1	1	1	1	1	1	1	1	1	1	1	1	1	1	1	1	1	1	1	1	1	1	-1
1704	1155	3	2012	ES	1	1	1	1	1	1	1	1	1	1	1	1	1	1	1	1	1	1	1	1	1	1	1	1	-1
1705	20072	1	2012	ES	1	1	1	1	1	1	1	1	1	1	1	1	1	1	3	3	2	1	3	1	1	1	1	1	-1
1706	1160	3	2012	ES	1	1	1	1	1	1	1	1	1	1	1	1	1	1	3	3	2	1	1	1	1	1	1	1	-1
1707	175	7	2012	ES	1	1	1	1	1	1	1	1	1	1	1	1	1	1	1	1	3	1	1	1	1	1	1	1	-1
1708	20075	1	2012	ES	1	1	1	1	1	1	1	1	1	1	1	1	1	1	1	1	1	1	1	1	1	1	1	1	-1
1709	547	5	2012	ES	1	1	1	1	1	1	1	1	1	1	1	1	1	1	1	1	1	1	1	1	1	1	1	1	-1
1710	10109	1	2012	ES	1	1	1	1	1	1	1	1	1	1	1	1	1	1	1	1	1	1	1	1	1	1	1	1	-1
1711	20078	1	2012	ES	1	1	1	1	1	1	1	1	1	1	1	1	1	1	1	1	1	1	1	1	1	1	1	1	-1
1712	151	7	2012	ES	1	1	1	1	1	1	1	1	1	1	1	1	1	1	3	3	2	1	1	1	1	1	1	1	-1
1713	1103	3	2012	ES	1	1	1	1	1	1	1	1	1	1	1	1	1	1	1	1	1	1	1	1	1	1	1	1	-1
1714	150	6	2012	ES	1	1	1	1	1	1	1	1	1	1	1	1	1	1	1	1	1	1	1	1	1	1	1	1	-1
1715	20082	1	2012	ES	1	1	1	1	1	1	1	1	1	1	1	1	1	1	1	1	1	1	1	1	1	1	1	1	-1
1716	20083	1	2012	ES	1	1	1	1	1	1	1	1	1	1	1	1	1	1	1	1	1	1	1	1	1	1	1	1	-1
1717	20084	1	2012	ES	1	1	1	1	1	1	1	1	1	1	1	1	1	1	1	1	1	1	1	1	1	1	1	1	-1
1718	20085	1	2012	ES	1	1	1	1	1	1	1	1	1	1	1	1	1	1	1	1	1	1	1	1	1	1	1	1	-1
1719	20086	1	2012	ES	1	1	1	1	1	1	1	1	1	1	1	1	1	1	1	1	1	1	1	1	1	1	1	1	-1
1720	20087	1	2012	ES	1	1	1	1	1	1	1	1	1	1	1	1	1	1	1	1	1	1	1	1	1	1	1	1	-1
1721	20088	1	2012	ES	1	1	1	1	1	1	1	1	1	1	1	1	1	1	1	1	1	1	1	1	1	1	1	1	-1
1722	20089	1	2012	ES	1	1	1	1	1	1	1	1	1	1	1	1	1	1	1	1	1	1	1	1	1	1	1	1	-1
1723	157	6	2012	ES	1	1	1	1	1	1	1	1	1	1	1	1	1	1	1	1	1	1	1	1	1	1	1	1	-1
1724	163	7	2012	ES	1	1	1	1	1	1	1	1	1	1	1	1	1	1	1	1	1	1	1	1	1	1	1	1	1
1725	172	6	2012	ES	1	1	1	1	1	1	1	1	1	1	1	1	1	1	1	1	1	1	1	1	1	1	1	1	-1
1726	20093	1	2012	ES	1	1	1	1	1	1	1	1	1	1	1	1	1	1	1	1	1	1	1	1	1	1	1	1	-1
1727	10117	1	2012	ES	1	1	1	1	1	1	1	1	1	1	1	1	1	1	1	1	1	1	1	1	1	1	1	1	1
1728	20095	1	2012	ES	1	1	1	1	1	1	1	1	1	1	1	1	1	1	1	1	1	1	1	1	1	1	1	1	-1
1729	561	3	2012	ES	1	1	1	1	1	1	1	1	1	1	1	1	1	1	1	1	1	1	1	1	1	1	1	1	-1
1730	10143	1	2012	ES	1	1	1	1	1	1	1	1	1	1	1	1	1	1	1	1	1	1	1	1	1	1	1	1	-1
1731	20098	1	2012	ES	1	1	1	1	1	1	1	1	1	1	1	1	1	1	1	1	1	1	1	1	1	1	1	1	-1
1732	20099	1	2012	ES	1	1	1	2	1	1	2	1	1	1	1	1	1	1	3	1	1	1	1	3	1	1	1	1	-1
1733	1092	3	2012	ES	1	1	1	1	1	1	1	1	1	1	1	1	1	1	1	1	2	1	1	1	1	1	1	1	-1
1734	173	4	2012	ES	1	1	1	1	1	1	1	1	1	1	1	1	1	1	1	1	1	1	1	1	1	1	1	1	-1
1735	174	7	2012	ES	1	1	1	1	1	1	1	1	1	1	1	1	1	1	3	1	2	1	1	1	1	1	1	1	-1
1736	1106	3	2012	ES	1	1	1	1	1	1	1	1	1	1	1	1	1	1	1	1	1	1	1	1	1	1	1	1	-1
1737	10119	1	2012	ES	1	1	1	1	1	1	1	1	1	1	1	1	1	1	3	1	2	1	1	3	1	1	1	1	1
1738	574	6	2012	ES	1	1	1	1	1	1	1	1	1	1	1	1	1	1	3	1	2	1	1	1	1	1	1	1	-1
1739	578	6	2012	ES	1	1	1	1	1	1	1	1	1	1	1	1	1	1	3	1	2	1	1	1	1	1	1	1	-1
1740	579	4	2012	ES	1	1	1	1	1	1	1	1	1	1	1	1	1	1	1	3	2	1	1	1	1	1	1	1	-1
1741	573	6	2012	ES	1	1	1	1	1	1	1	1	1	1	1	1	1	1	1	1	1	1	1	1	1	1	1	1	-1
1742	20109	1	2012	ES	1	1	1	1	1	1	1	1	1	1	1	1	1	1	1	1	1	1	1	1	1	1	1	1	-1
1743	154	7	2012	ES	1	1	1	1	1	1	1	1	1	1	1	1	1	1	1	1	1	1	1	1	1	1	1	1	-1
1744	856	5	2012	ES	1	1	1	1	1	1	1	1	1	1	1	1	1	1	1	1	1	1	1	1	1	1	1	1	-1
1745	1102	4	2012	ES	1	1	1	1	1	1	1	1	1	1	1	1	1	1	1	1	1	1	1	1	1	1	1	1	-1
1746	10103	1	2012	ES	1	1	1	1	1	1	1	1	1	1	1	1	1	1	1	1	1	1	1	1	1	1	1	1	-1
1747	10138	1	2012	ES	1	1	1	1	1	1	1	1	1	1	1	1	1	1	1	1	1	1	1	1	1	1	1	1	-1
1748	171	6	2012	ES	1	1	1	1	1	1	1	1	1	1	1	1	1	1	1	3	1	1	1	3	1	1	1	1	-1
1749	176	6	2012	ES	1	1	1	1	1	1	1	1	1	1	1	1	1	1	1	3	1	1	1	1	1	1	1	1	-1
1750	1037	3	2012	ES	1	1	1	1	1	1	1	1	1	1	1	1	1	1	1	1	1	1	1	1	1	1	1	1	1
1751	181	6	2012	ES	1	1	1	1	1	1	1	1	1	1	1	1	1	1	1	1	1	1	1	1	1	1	1	1	-1
1752	178	7	2012	ES	1	1	1	1	1	1	1	1	1	1	1	1	1	1	1	1	1	1	1	1	1	1	1	1	-1
1753	1085	3	2012	ES	1	1	1	1	1	1	1	1	1	1	1	1	1	1	1	3	1	1	1	1	1	1	1	1	-1
1754	10116	1	2012	ES	1	1	1	1	1	1	1	1	1	1	1	1	1	1	1	3	1	1	1	1	1	1	1	1	-1
1755	10139	1	2012	ES	1	1	1	1	1	1	1	1	1	1	1	1	1	1	1	1	1	1	1	1	1	1	1	1	-1
1756	20123	1	2012	ES	1	1	1	2	1	1	2	1	1	1	1	1	3	1	3	1	2	1	1	3	1	1	1	1	-1
1757	1107	3	2012	ES	1	1	1	1	1	1	1	1	1	1	1	1	1	1	1	3	1	1	1	1	1	1	1	1	-1
1758	192	6	2012	ES	1	1	1	1	1	1	1	1	1	1	1	1	1	1	1	1	1	1	1	1	1	1	1	1	-1
1759	1033	3	2012	ES	1	1	1	1	1	1	1	1	1	1	1	1	1	1	1	1	1	1	1	1	1	1	1	1	-1
1760	1032	3	2012	ES	1	1	1	1	1	1	1	1	1	1	1	1	1	1	1	1	1	1	1	1	1	1	1	1	-1
1761	1227	2	2012	ES	1	1	1	1	1	1	1	1	1	1	1	1	1	1	1	1	1	1	1	1	1	1	1	1	-1
1762	10041	1	2012	ES	1	1	1	1	1	1	1	1	1	1	1	1	1	1	3	3	2	3	1	1	1	1	1	1	-1
1763	1222	2	2012	ES	1	1	1	1	1	1	1	1	1	1	1	1	1	1	1	1	1	1	1	1	1	1	1	1	-1
1764	1226	2	2012	ES	1	1	1	1	1	1	1	1	1	1	1	1	1	1	1	3	1	1	1	1	1	1	1	1	-1
1765	20132	1	2012	ES	1	1	1	1	1	1	1	1	1	1	1	1	1	1	1	1	1	1	1	1	1	1	1	1	-1
1766	1224	2	2012	ES	1	1	1	1	1	1	1	1	1	1	1	1	1	1	3	1	2	3	1	1	1	1	1	1	1
1767	1225	2	2012	ES	1	1	1	1	1	1	1	1	1	1	1	3	3	3	1	3	3	1	1	1	1	1	1	1	-1
1768	10050	1	2012	ES	1	1	1	1	1	1	1	1	1	1	1	1	1	1	1	1	2	1	1	1	1	1	1	1	-1
1769	20136	1	2012	ES	1	1	1	1	1	1	1	1	1	1	1	1	1	1	1	1	1	1	1	1	1	1	1	1	-1
1770	20137	1	2012	ES	1	1	1	1	1	1	1	1	1	1	1	1	1	1	1	1	1	1	1	1	1	1	1	1	-1
1771	20138	1	2012	ES	1	1	1	1	1	1	1	1	1	1	1	1	1	1	3	3	2	1	1	3	1	1	1	1	-1
1772	20139	1	2012	ES	1	1	1	1	1	1	1	1	1	1	3	1	1	3	1	1	3	1	1	2	1	1	1	1	-1
1773	10168	1	2012	ES	1	1	1	1	1	1	1	1	1	1	1	1	1	1	1	1	3	1	1	1	1	1	1	1	-1
1774	20141	1	2012	ES	1	1	1	1	1	1	1	1	1	1	1	1	1	1	1	1	1	1	1	1	1	1	1	1	-1
1775	20142	1	2012	ES	1	1	1	1	1	1	1	1	1	1	1	1	1	1	1	1	1	1	1	1	1	1	1	1	-1
1776	20143	1	2012	ES	1	1	1	1	1	1	1	1	1	1	1	1	1	1	3	3	2	1	1	1	1	1	1	1	-1
1777	540	5	2012	ES	1	1	1	1	1	1	1	1	1	1	1	1	1	1	1	1	1	1	1	1	1	1	1	1	-1
1778	198	6	2012	ES	1	1	1	1	1	1	1	1	1	1	2	2	1	1	3	3	2	1	1	1	1	1	1	1	-1
1779	197	4	2012	ES	1	1	1	1	1	1	1	1	1	1	1	1	1	1	3	3	2	1	1	1	1	1	1	1	-1
1780	1188	2	2012	ES	1	1	1	1	1	1	1	1	1	1	1	1	1	1	1	1	1	1	1	1	1	1	1	1	-1
1781	20148	1	2012	ES	1	1	1	1	1	1	1	1	1	1	1	1	1	1	3	3	2	3	1	3	1	1	1	1	-1
1782	20149	1	2012	ES	1	1	1	1	1	1	1	1	1	1	1	1	1	3	3	3	3	1	3	1	1	1	1	1	-1
1783	20150	1	2012	ES	1	1	1	1	1	1	1	1	1	1	1	1	1	1	3	3	2	1	1	1	1	1	1	1	-1
1784	20151	1	2012	ES	1	1	1	1	1	1	1	1	1	1	1	1	1	1	1	1	2	1	1	1	1	1	1	1	-1
1785	20152	1	2012	ES	1	1	1	1	1	1	1	1	1	1	1	1	1	1	1	1	1	1	1	1	1	1	1	1	-1
1786	20153	1	2012	ES	1	1	1	1	1	1	1	1	1	1	1	1	1	2	3	1	2	1	1	3	1	1	1	1	-1
1787	1140	3	2012	ES	1	1	1	1	1	1	1	1	1	1	1	1	1	1	1	1	2	1	1	1	1	1	1	1	-1
1788	20155	1	2012	ES	1	1	1	1	1	1	1	1	1	1	2	1	1	2	3	1	2	3	3	3	1	1	1	1	-1
1789	20156	1	2012	ES	1	1	1	1	1	1	1	1	1	1	2	1	1	1	3	1	2	3	1	1	1	1	1	1	-1
1790	865	3	2012	ES	1	1	1	1	1	1	1	1	1	1	1	1	1	1	3	3	1	1	1	1	1	1	1	1	-1
1791	1027	3	2012	ES	1	1	1	1	1	1	1	1	1	1	1	1	1	1	1	1	2	1	1	1	1	1	1	1	-1
1792	1028	4	2012	ES	2	1	1	1	1	1	1	1	1	3	1	1	2	1	3	3	2	1	1	1	1	1	1	1	-1
1793	864	3	2012	ES	1	1	1	1	1	1	1	1	1	1	1	1	1	1	1	3	2	3	1	3	1	1	1	1	-1
1794	10177	1	2012	ES	1	1	1	1	1	1	1	1	1	1	1	1	1	1	1	1	2	1	1	1	1	1	1	1	-1
1795	10181	1	2012	ES	1	1	1	1	1	1	1	1	1	1	1	1	1	1	3	1	2	1	1	1	1	1	1	1	-1
1796	10179	1	2012	ES	1	1	1	1	1	1	1	1	1	1	1	1	1	1	3	1	2	1	1	1	1	1	1	1	-1
1797	20164	1	2012	ES	1	1	1	1	1	1	1	1	1	1	1	1	1	1	1	1	2	1	1	1	1	1	1	1	-1
1798	20165	1	2012	ES	2	3	1	1	1	1	1	1	1	1	1	1	1	1	1	1	1	1	1	1	1	1	1	1	-1
1799	10188	1	2012	ES	2	3	2	1	1	1	1	1	1	3	1	1	1	1	3	3	1	3	1	1	1	1	1	1	-1
1800	20167	1	2012	ES	1	1	1	1	1	1	1	1	1	1	1	2	2	2	3	3	2	1	3	1	1	1	1	1	-1
1801	10174	1	2012	ES	1	1	1	1	1	1	1	1	1	1	1	1	1	1	3	1	2	1	1	1	1	1	1	1	-1
1802	20169	1	2012	ES	2	3	2	1	1	1	1	1	1	3	1	1	1	1	1	1	1	1	1	1	1	1	1	1	-1
1803	20170	1	2012	ES	2	3	2	1	1	1	1	1	1	3	1	1	1	1	3	3	2	1	1	1	1	1	1	1	-1
1804	10173	1	2012	ES	1	1	1	2	1	1	2	1	1	1	2	1	1	2	1	1	2	1	3	3	1	1	1	1	-1
1805	20172	1	2012	ES	2	3	1	1	1	1	1	1	1	3	1	1	1	1	3	1	2	1	1	1	1	1	1	1	-1
1806	10175	1	2012	ES	2	3	2	1	1	1	1	1	1	3	1	1	1	1	3	3	2	3	1	1	1	1	1	1	-1
1807	20174	1	2012	ES	2	1	1	2	1	1	2	1	1	1	1	1	1	1	3	3	1	1	3	1	1	1	1	1	-1
1808	20175	1	2012	ES	2	3	2	1	1	1	1	1	1	3	1	1	1	1	3	1	2	1	1	1	1	1	1	1	-1
1809	912	5	2012	PT	1	1	1	1	1	1	1	1	1	1	1	1	1	1	1	1	1	1	1	3	1	1	1	1	1
1810	1177	2	2012	PT	1	1	1	1	1	1	1	1	1	1	1	1	1	1	1	1	1	1	1	3	1	1	1	1	1
1811	914	5	2012	PT	1	1	1	1	1	1	2	1	1	1	1	1	1	1	1	1	1	1	1	3	1	1	1	1	1
1812	891	5	2012	PT	1	1	1	2	1	1	2	1	1	1	1	1	1	1	1	1	1	1	1	3	1	1	1	1	1
1813	894	5	2012	PT	1	1	1	2	1	1	2	1	1	1	1	1	1	1	1	1	1	1	1	3	1	1	1	1	-1
1814	890	5	2012	PT	1	1	1	1	1	1	1	1	1	1	1	1	1	1	1	1	1	1	3	3	1	1	1	1	-1
1815	897	5	2012	PT	1	1	1	1	1	1	2	1	1	1	2	1	1	1	1	1	1	1	1	3	1	1	1	1	-1
1816	889	5	2012	PT	1	1	1	1	1	1	1	1	1	1	1	1	1	1	1	1	2	1	1	3	1	1	1	1	-1
1817	1240	1	2012	PT	1	1	1	2	1	1	2	1	1	1	2	1	1	1	1	1	2	1	3	3	1	1	1	1	-1
1818	895	5	2012	PT	1	1	1	1	1	1	1	1	1	1	1	1	1	1	1	1	1	1	1	1	1	1	1	1	-1
1819	896	5	2012	PT	1	1	1	2	1	1	2	1	1	1	1	1	1	1	1	1	1	1	1	3	1	1	1	1	-1
1820	1065	3	2012	PT	1	1	1	1	1	1	1	1	1	1	1	1	1	1	1	1	2	1	3	3	1	1	1	1	-1
1821	900	5	2012	PT	1	1	1	1	1	1	1	1	1	1	1	1	1	1	1	1	2	1	3	3	1	1	1	1	-1
1822	901	4	2012	PT	1	1	1	1	1	1	1	1	1	1	2	1	1	1	1	1	2	1	3	3	1	1	1	1	-1
1823	902	5	2012	PT	1	1	1	1	1	1	1	1	1	1	1	1	1	1	1	1	1	1	1	3	1	1	1	1	-1
1824	1066	3	2012	PT	1	1	1	2	1	1	2	1	1	1	2	1	1	1	1	1	1	1	3	3	1	1	1	1	-1
1825	1023	4	2012	PT	1	1	1	2	1	1	2	1	1	1	2	1	1	1	1	1	2	1	3	3	1	1	1	1	-1
1826	909	5	2012	PT	1	1	1	2	1	1	2	1	1	1	2	1	1	1	1	1	1	1	3	3	1	1	1	1	-1
1827	1067	3	2012	PT	1	1	1	2	1	1	2	1	1	1	1	1	1	1	1	1	1	1	3	3	1	1	1	1	1
1828	1068	3	2012	PT	1	1	1	2	1	1	2	1	1	1	1	1	1	1	1	1	1	1	3	3	1	1	1	1	1
1829	1025	4	2012	PT	1	1	1	2	1	1	2	1	1	1	2	1	1	1	1	1	1	1	3	3	1	1	1	1	1
1830	1069	3	2012	PT	1	1	1	2	1	1	2	1	1	1	1	1	1	1	1	1	1	1	3	3	1	1	1	1	1
1831	1070	4	2012	PT	1	1	1	2	1	1	2	1	1	1	2	1	1	1	1	1	1	1	1	3	1	1	1	1	1
1832	1171	2	2012	PT	1	1	1	2	1	1	2	1	1	1	1	1	1	1	1	1	1	1	1	3	1	1	1	1	1
1833	1241	1	2012	PT	1	1	1	2	1	1	2	1	1	1	2	1	1	1	1	1	1	1	1	3	1	1	1	1	-1
1834	1242	1	2012	PT	1	1	1	2	1	1	2	1	1	1	1	1	1	1	1	1	2	1	1	3	1	1	1	1	-1
1835	1243	1	2012	PT	1	1	1	2	1	1	2	1	1	1	1	1	1	1	1	1	1	1	1	3	1	1	1	1	-1
1836	1019	4	2012	PT	1	1	1	2	1	1	2	1	1	1	2	1	1	1	1	1	1	1	1	1	1	1	1	1	-1
1837	1055	3	2012	PT	1	1	1	2	1	1	2	1	1	1	1	1	1	1	1	1	2	1	1	3	1	1	1	1	-1
1838	1244	1	2012	PT	1	1	1	2	1	1	2	1	1	1	1	1	1	1	1	1	2	1	1	3	1	1	1	1	-1
1839	1245	1	2012	PT	1	1	1	2	1	1	2	1	1	1	1	1	1	1	1	1	2	1	1	3	1	1	1	1	-1
1840	1173	2	2012	PT	1	1	1	2	1	1	2	1	1	1	1	1	1	1	1	1	2	1	1	3	1	1	1	1	-1
1841	1246	1	2012	PT	1	1	1	2	1	1	2	1	1	1	1	1	1	1	1	1	1	1	1	3	1	1	1	1	-1
1842	1061	3	2012	PT	1	1	1	2	1	1	2	1	1	1	1	1	1	1	1	1	2	1	3	3	1	1	1	1	-1
1843	1062	3	2012	PT	1	1	1	2	1	1	2	1	1	1	1	1	1	1	1	1	2	1	3	3	1	1	1	1	-1
1844	1060	3	2012	PT	1	1	1	2	1	1	2	1	1	1	1	1	1	1	1	1	2	1	3	3	1	1	1	1	-1
1845	1247	1	2012	PT	1	1	1	2	1	1	2	1	1	1	1	1	1	1	1	1	2	1	1	3	1	1	1	1	-1
1846	1174	2	2012	PT	1	1	1	2	1	1	2	1	1	1	1	1	1	1	1	1	2	1	1	3	1	1	1	1	-1
1847	1172	2	2012	PT	1	1	1	2	1	1	2	1	1	1	1	1	1	1	1	1	1	1	1	3	1	1	1	1	-1
1848	1058	3	2012	PT	1	1	1	2	1	1	2	1	1	1	1	1	1	1	1	1	2	1	3	3	1	1	1	1	-1
1849	1057	3	2012	PT	1	1	1	2	1	1	2	1	1	1	1	1	1	1	1	1	2	1	3	3	1	1	1	1	-1
1850	949	2	2013	RO	1	1	1	1	1	1	1	1	1	1	1	1	1	1	3	1	2	1	3	1	1	1	1	1	2
1851	932	2	2013	RO	1	1	1	1	1	1	1	1	1	1	1	1	1	1	1	1	1	1	3	1	1	1	1	1	-1
1852	146	7	2013	ES	1	1	1	1	1	1	1	1	1	1	1	1	1	1	1	1	1	1	1	1	1	1	1	1	-1
1853	141	7	2013	ES	1	1	1	1	1	1	1	1	1	1	1	1	1	1	1	1	1	1	1	1	1	1	1	1	-1
1854	10003	1	2013	ES	1	1	1	1	1	1	1	1	1	1	1	1	1	1	1	1	1	1	1	3	1	1	1	1	-1
1855	1131	2	2013	ES	1	1	1	1	1	1	1	1	1	1	1	1	1	1	3	1	2	1	1	1	1	1	1	1	-1
1856	10005	1	2013	ES	1	1	1	1	1	1	1	1	1	1	1	1	1	1	1	1	1	1	1	1	1	1	1	1	-1
1857	10006	2	2013	ES	1	1	1	1	1	1	1	1	1	1	1	1	1	1	1	1	1	1	1	1	1	1	1	1	-1
1858	10007	1	2013	ES	1	1	1	1	1	1	1	1	1	1	1	1	1	1	1	1	1	1	1	1	1	1	1	1	-1
1859	10008	1	2013	ES	1	1	1	1	1	1	1	1	1	1	1	1	1	1	1	1	1	1	1	1	1	1	1	1	-1
1860	107	3	2013	ES	1	1	1	1	1	1	1	1	1	1	1	1	1	1	3	1	2	1	1	1	1	1	1	1	-1
1861	10010	2	2013	ES	1	1	1	1	1	1	1	1	1	1	1	1	1	1	3	3	2	3	3	1	1	1	1	1	-1
1862	10011	1	2013	ES	1	1	1	1	1	1	1	1	1	1	1	1	1	1	1	1	1	1	1	1	1	1	1	1	-1
1863	10012	1	2013	ES	1	1	1	1	1	1	1	1	1	1	1	1	1	1	1	1	2	1	3	1	1	1	1	1	-1
1864	10013	1	2013	ES	1	1	1	1	1	1	1	1	1	1	1	1	1	1	1	1	1	1	1	1	1	1	1	1	-1
1865	10014	1	2013	ES	1	1	1	1	1	1	1	1	1	1	1	1	1	1	1	1	1	1	1	1	1	1	1	1	-1
1866	10015	2	2013	ES	1	1	1	1	1	1	1	1	1	1	1	1	1	1	1	1	1	1	1	1	1	1	1	1	-1
1867	10016	1	2013	ES	1	1	1	1	1	1	1	1	1	1	1	1	1	1	1	1	1	1	1	1	1	1	1	1	-1
1868	109	7	2013	ES	1	1	1	1	1	1	1	1	1	1	1	1	1	1	1	1	2	1	1	1	1	1	1	1	-1
1869	10018	1	2013	ES	1	1	1	1	1	1	1	1	1	1	1	1	1	1	1	1	1	1	1	1	1	1	1	1	-1
1870	10019	1	2013	ES	1	1	1	1	1	1	1	1	1	1	1	1	1	1	1	1	2	1	1	1	1	1	1	1	-1
1871	125	6	2013	ES	1	1	1	1	1	1	1	1	1	1	1	1	1	1	1	1	1	1	1	1	1	1	1	1	-1
1872	10021	1	2013	ES	1	1	1	1	1	1	1	1	1	1	1	1	1	1	3	1	2	1	1	1	1	1	1	1	-1
1873	10022	1	2013	ES	1	1	1	1	1	1	1	1	1	1	1	1	1	1	3	1	2	3	1	1	1	1	1	1	-1
1874	106	7	2013	ES	1	1	1	1	1	1	1	1	1	1	1	1	1	1	1	1	1	1	1	1	1	1	1	1	-1
1875	10024	1	2013	ES	1	1	1	1	1	1	1	1	1	1	1	1	1	1	1	1	1	1	1	1	1	1	1	1	-1
1876	10025	1	2013	ES	1	1	1	1	1	1	1	1	1	1	1	1	1	1	1	1	1	1	1	1	1	1	1	1	-1
1877	612	5	2013	ES	1	1	1	1	1	1	1	1	1	1	1	1	1	1	1	1	1	1	1	1	1	1	1	1	-1
1878	10027	1	2013	ES	1	1	1	1	1	1	1	1	1	1	1	1	1	1	1	1	1	1	1	1	1	1	1	1	-1
1879	1201	2	2013	ES	1	1	1	1	1	1	1	1	1	1	1	1	1	1	1	1	1	1	1	1	1	1	1	1	-1
1880	10029	2	2013	ES	1	1	1	1	1	1	1	1	1	1	1	1	1	1	1	1	1	1	1	1	1	1	1	1	-1
1881	1159	4	2013	ES	1	1	1	1	1	1	1	1	1	1	1	1	1	1	1	1	1	1	1	1	1	1	1	1	-1
1882	10031	1	2013	ES	1	1	1	1	1	1	1	1	1	1	1	1	1	1	3	3	2	1	1	1	1	1	1	1	-1
1883	10032	1	2013	ES	1	1	1	1	1	1	1	1	1	1	1	1	1	1	3	1	2	3	1	1	1	1	1	1	-1
1884	1160	4	2013	ES	1	1	1	1	1	1	1	1	1	1	1	1	1	1	3	3	2	1	1	1	1	1	1	1	-1
1885	10034	1	2013	ES	1	1	1	1	1	1	1	1	1	1	1	1	1	1	3	1	2	1	1	1	1	1	1	1	-1
1886	10035	2	2013	ES	1	1	1	1	1	1	1	1	1	1	1	1	1	1	1	1	1	1	1	1	1	1	1	1	-1
1887	1194	3	2013	ES	1	1	1	1	1	1	1	1	1	1	1	1	1	1	3	1	2	1	1	1	1	1	1	1	-1
1888	10037	1	2013	ES	1	1	1	1	1	1	1	1	1	1	1	1	1	1	3	1	2	1	1	1	1	1	1	1	-1
1889	1157	4	2013	ES	1	1	1	1	1	1	1	1	1	1	1	1	1	1	3	1	2	3	1	1	1	1	1	1	-1
1890	1156	4	2013	ES	1	1	1	1	1	1	1	1	1	1	1	1	1	1	3	3	2	3	1	1	1	1	1	1	-1
1891	1222	3	2013	ES	1	1	1	1	1	1	1	1	1	1	1	1	1	1	1	1	1	1	1	1	1	1	1	1	-1
1892	10041	2	2013	ES	1	1	1	1	1	1	1	1	1	1	1	1	1	1	1	1	1	1	1	1	1	1	1	1	-1
1893	1224	3	2013	ES	1	1	1	1	1	1	1	1	1	1	1	1	1	1	1	1	1	1	1	1	1	1	1	1	-1
1894	196	3	2013	ES	1	1	1	1	1	1	1	1	1	1	1	1	1	1	1	1	1	1	1	1	1	1	1	1	-1
1895	10044	1	2013	ES	1	1	1	1	1	1	1	1	1	1	1	1	1	1	1	1	1	1	1	1	1	1	1	1	-1
1896	192	7	2013	ES	1	1	1	1	1	1	1	1	1	1	1	1	1	1	3	1	2	3	1	1	1	1	1	1	-1
1897	1223	2	2013	ES	1	1	1	1	1	1	1	1	1	1	1	1	1	1	1	1	1	1	1	1	1	1	1	1	-1
1898	190	2	2013	ES	1	1	1	1	1	1	1	1	1	1	1	1	1	1	3	1	2	1	1	1	1	1	1	1	-1
1899	1226	3	2013	ES	1	1	1	1	1	1	1	1	1	1	1	1	1	1	3	1	2	3	1	1	1	1	1	1	-1
1900	10049	1	2013	ES	1	1	1	1	1	1	1	1	1	1	1	1	1	1	3	1	2	1	1	3	1	1	1	1	-1
1901	10050	2	2013	ES	1	1	1	1	1	1	1	1	1	1	1	1	1	1	3	1	2	1	1	1	1	1	1	1	-1
1902	1032	4	2013	ES	2	1	1	2	1	1	1	1	1	1	1	1	1	1	1	3	2	1	1	1	1	1	1	1	-1
1903	10052	2	2013	ES	1	1	1	1	1	1	1	1	1	1	1	1	1	1	1	1	1	1	1	1	1	1	1	1	-1
1904	10053	1	2013	ES	1	1	1	1	1	1	1	1	1	1	1	1	1	1	1	1	1	1	1	1	1	1	1	1	-1
1905	10054	2	2013	ES	1	1	1	1	1	1	1	1	1	1	1	1	1	1	1	1	1	1	1	1	1	1	1	1	-1
1906	10055	1	2013	ES	1	1	1	1	1	1	1	1	1	1	1	1	1	1	1	1	1	1	1	1	1	1	1	1	-1
1907	10056	1	2013	ES	1	1	1	1	1	1	1	1	1	1	1	1	1	1	1	1	1	1	1	1	1	1	1	1	-1
1908	10057	1	2013	ES	1	1	1	1	1	1	1	1	1	1	1	1	1	1	1	1	1	1	1	1	1	1	1	1	-1
1909	10058	1	2013	ES	1	1	1	1	1	1	1	1	1	1	1	1	1	1	1	1	2	1	1	1	1	1	1	1	-1
1910	10059	1	2013	ES	1	1	1	1	1	1	1	1	1	1	1	1	1	1	1	1	1	1	1	1	1	1	1	1	-1
1911	10060	1	2013	ES	1	1	1	1	1	1	1	1	1	1	1	1	1	1	1	1	1	1	1	1	1	1	1	1	-1
1912	10061	1	2013	ES	1	1	1	1	1	1	1	1	1	1	1	1	1	1	1	1	2	1	1	1	1	1	1	1	-1
1913	10062	1	2013	ES	1	1	1	1	1	1	1	1	1	1	1	1	1	1	1	1	1	1	1	1	1	1	1	1	-1
1914	10063	1	2013	ES	1	1	1	1	1	1	1	1	1	1	1	1	1	1	1	1	1	1	1	1	1	1	1	1	-1
1915	10064	1	2013	ES	1	1	1	1	1	1	1	1	1	1	1	1	1	1	1	1	1	1	1	1	1	1	1	1	-1
1916	598	7	2013	ES	1	1	1	1	1	1	1	1	1	1	1	1	1	1	1	1	1	1	1	1	1	1	1	1	-1
1917	597	7	2013	ES	1	1	1	1	1	1	1	1	1	1	1	1	1	1	1	1	1	1	1	1	1	1	1	1	-1
1918	10067	1	2013	ES	1	1	1	1	1	1	1	1	1	1	1	1	1	1	1	1	1	1	1	1	1	1	1	1	-1
1919	1216	2	2013	ES	1	1	1	1	1	1	1	1	1	1	1	1	1	1	1	1	1	1	1	1	1	1	1	1	-1
1920	10069	1	2013	ES	1	1	1	1	1	1	1	1	1	1	1	1	1	1	1	1	1	1	1	1	1	1	1	1	-1
1921	1207	2	2013	ES	1	1	1	1	1	1	1	1	1	1	1	1	1	1	1	1	1	1	1	1	1	1	1	1	-1
1922	605	6	2013	ES	1	1	1	1	1	1	1	1	1	1	1	1	1	1	1	1	1	1	1	1	1	1	1	1	-1
1923	10072	1	2013	ES	1	1	1	1	1	1	1	1	1	1	1	1	1	1	1	1	1	1	1	1	1	1	1	1	-1
1924	10073	1	2013	ES	1	1	1	1	1	1	1	1	1	1	1	1	1	1	1	1	1	1	1	1	1	1	1	1	-1
1925	10074	1	2013	ES	1	1	1	1	1	1	1	1	1	1	1	1	1	1	1	1	1	1	1	1	1	1	1	1	-1
1926	10075	1	2013	ES	1	1	1	1	1	1	1	1	1	1	1	1	1	1	1	1	1	1	1	1	1	1	1	1	1
1927	10076	1	2013	ES	1	1	1	1	1	1	1	1	1	1	1	1	1	1	1	1	1	1	1	1	1	1	1	1	-1
1928	10077	1	2013	ES	1	1	1	1	1	1	1	1	1	1	1	1	1	1	1	1	1	1	1	1	1	1	1	1	-1
1929	10078	2	2013	ES	1	1	1	1	1	1	1	1	1	1	1	1	1	1	1	1	1	1	1	1	1	1	1	1	-1
1930	10079	1	2013	ES	1	1	1	2	1	1	2	1	1	1	1	1	1	1	1	1	1	1	1	1	1	1	1	1	1
1931	10080	2	2013	ES	1	1	1	1	1	1	1	1	1	1	1	1	1	1	1	1	1	1	1	1	1	1	1	1	-1
1932	102	8	2013	ES	1	1	1	1	1	1	1	1	1	1	1	1	1	1	1	1	1	1	1	1	1	1	1	1	-1
1933	10082	1	2013	ES	1	1	1	1	1	1	1	1	1	1	1	1	1	1	1	1	1	1	1	1	1	1	1	1	-1
1934	104	6	2013	ES	1	1	1	1	1	1	1	1	1	1	1	1	1	1	1	1	1	1	1	1	1	1	1	1	-1
1935	10084	1	2013	ES	1	1	1	1	1	1	1	1	1	1	1	1	1	1	3	1	2	1	1	1	1	1	1	1	-1
1936	10085	1	2013	ES	1	1	1	2	1	1	2	1	1	1	1	1	1	1	3	1	2	1	1	1	1	1	1	1	-1
1937	10086	2	2013	ES	1	1	1	1	1	1	1	1	1	1	1	1	1	1	1	1	1	1	1	1	1	1	1	1	-1
1938	138	6	2013	ES	1	1	1	2	1	1	2	1	1	1	1	1	1	1	1	1	1	1	1	1	1	1	1	1	1
1939	600	4	2013	ES	1	1	1	1	1	1	1	1	1	1	1	1	1	1	1	3	2	1	1	1	1	1	1	1	-1
1940	10089	1	2013	ES	1	1	1	1	1	1	1	1	1	1	1	1	1	1	1	1	1	1	1	1	1	1	1	1	-1
1941	1210	3	2013	ES	1	1	1	1	1	1	1	1	1	1	1	1	1	1	1	1	2	1	1	1	1	1	1	1	-1
1942	10091	1	2013	ES	1	1	1	1	1	1	1	1	1	1	1	1	1	1	3	1	2	1	1	1	1	1	1	1	-1
1943	10092	1	2013	ES	1	1	1	1	1	1	1	1	1	1	1	1	1	1	1	1	2	1	1	1	1	1	1	1	-1
1944	1212	3	2013	ES	1	1	1	1	1	1	1	1	1	1	1	1	1	1	3	3	2	1	1	1	1	1	1	1	-1
1945	10094	1	2013	ES	1	1	1	1	1	1	1	1	1	1	1	1	1	1	3	1	2	1	1	1	1	1	1	1	-1
1946	100	6	2013	ES	1	1	1	1	1	1	1	1	1	1	1	1	3	1	3	3	2	3	1	1	1	1	1	1	-1
1947	10096	1	2013	ES	1	1	1	1	1	1	1	1	1	1	3	1	1	3	1	3	2	1	1	1	1	1	1	1	-1
1948	101	6	2013	ES	1	1	1	1	1	1	1	1	1	1	1	1	1	1	3	1	2	3	1	1	1	1	1	1	-1
1949	10098	2	2013	ES	1	1	1	1	1	1	1	1	1	1	1	1	1	1	3	1	2	1	1	1	1	1	1	1	-1
1950	1102	5	2013	ES	1	1	1	1	1	1	1	1	1	1	1	1	1	1	1	1	1	1	1	1	1	1	1	1	-1
1951	10100	1	2013	ES	1	1	1	1	1	1	1	1	1	1	1	1	1	1	1	1	1	1	1	1	1	1	1	1	-1
1952	154	8	2013	ES	1	1	1	1	1	1	1	1	1	1	1	1	1	1	1	1	1	1	1	1	1	1	1	1	-1
1953	10102	1	2013	ES	1	1	1	1	1	1	1	1	1	1	1	1	1	1	1	1	1	1	1	1	1	1	1	1	-1
1954	10103	2	2013	ES	1	1	1	1	1	1	1	1	1	1	1	1	1	1	1	1	1	1	1	1	1	1	1	1	-1
1955	163	8	2013	ES	1	1	1	1	1	1	1	1	1	1	1	1	1	1	1	1	1	1	1	1	1	1	1	1	-1
1956	1088	3	2013	ES	1	1	1	1	1	1	1	1	1	1	1	1	1	1	1	1	1	1	1	1	1	1	1	1	-1
1957	10106	1	2013	ES	1	1	1	1	1	1	1	1	1	1	1	1	1	1	1	1	1	1	1	1	1	1	1	1	-1
1958	10107	1	2013	ES	1	1	1	1	1	1	1	1	1	1	1	1	1	1	1	1	1	1	1	1	1	1	1	1	-1
1959	175	8	2013	ES	1	1	1	1	1	1	1	1	1	1	1	1	1	1	1	1	1	1	1	1	1	1	1	1	-1
1960	10109	2	2013	ES	1	1	1	1	1	1	1	1	1	1	1	1	1	1	1	1	1	1	1	1	1	1	1	1	-1
1961	10110	1	2013	ES	1	1	1	1	1	1	1	1	1	1	1	1	1	1	1	1	1	1	1	1	1	1	1	1	-1
1962	1107	4	2013	ES	1	1	1	1	1	1	1	1	1	1	1	1	1	1	1	1	1	1	1	1	1	1	1	1	-1
1963	10112	1	2013	ES	1	1	1	1	1	1	1	1	1	1	1	1	1	1	1	1	1	1	1	1	1	1	1	1	-1
1964	10113	1	2013	ES	1	1	1	1	1	1	1	1	1	1	1	1	1	1	1	1	1	1	1	1	1	1	1	1	-1
1965	171	7	2013	ES	1	1	1	1	1	1	1	1	1	1	1	1	1	1	1	1	1	1	1	1	1	1	1	1	-1
1966	547	6	2013	ES	1	1	1	1	1	1	1	1	1	1	1	1	1	1	1	1	1	1	1	1	1	1	1	1	-1
1967	10116	2	2013	ES	1	1	1	1	1	1	1	1	1	1	1	1	1	1	1	1	1	1	1	1	1	1	1	1	-1
1968	10117	2	2013	ES	1	1	1	1	1	1	1	1	1	1	1	1	1	1	1	1	1	1	1	1	1	1	1	1	-1
1969	173	5	2013	ES	1	1	1	1	1	1	1	1	1	1	1	1	1	1	1	1	1	1	1	1	1	1	1	1	-1
1970	10119	2	2013	ES	1	1	1	1	1	1	1	1	1	1	1	1	1	1	1	1	1	1	1	1	1	1	1	1	-1
1971	10120	1	2013	ES	1	1	1	1	1	1	1	1	1	1	1	1	1	1	1	1	1	1	1	1	1	1	1	1	-1
1972	174	8	2013	ES	1	1	1	1	1	1	1	1	1	1	1	1	1	1	1	1	1	1	1	1	1	1	1	1	-1
1973	153	6	2013	ES	1	1	1	1	1	1	1	1	1	1	1	1	1	1	1	1	1	1	1	1	1	1	1	1	-1
1974	157	7	2013	ES	1	1	1	1	1	1	1	1	1	1	1	1	1	1	1	1	1	1	1	1	1	1	1	1	-1
1975	579	5	2013	ES	1	1	1	1	1	1	1	1	1	1	1	1	1	1	1	1	1	1	1	1	1	1	1	1	-1
1976	1103	4	2013	ES	1	1	1	1	1	1	1	1	1	1	1	1	1	1	1	1	1	1	1	1	1	1	1	1	-1
1977	181	7	2013	ES	1	1	1	1	1	1	1	1	1	1	1	1	1	1	1	1	1	1	1	1	1	1	1	1	-1
1978	172	7	2013	ES	1	1	1	1	1	1	1	1	1	1	1	1	1	1	1	1	1	1	1	1	1	1	1	1	-1
1979	856	6	2013	ES	1	1	1	1	1	1	1	1	1	1	1	1	1	1	1	1	1	1	1	1	1	1	1	1	-1
1980	1092	4	2013	ES	1	1	1	1	1	1	1	1	1	1	1	1	1	1	1	1	1	1	1	1	1	1	1	1	-1
1981	1101	2	2013	ES	1	1	1	1	1	1	1	1	1	1	1	1	1	1	1	1	1	1	1	1	1	1	1	1	-1
1982	10131	1	2013	ES	1	1	1	1	1	1	1	1	1	1	1	1	1	1	1	1	1	1	1	1	1	1	1	1	-1
1983	10132	1	2013	ES	1	1	1	2	1	1	2	1	1	1	1	1	1	1	3	3	2	1	1	1	1	1	1	1	-1
1984	574	7	2013	ES	1	1	1	1	1	1	1	1	1	1	1	1	1	1	3	1	2	1	1	3	1	1	1	1	-1
1985	1193	2	2013	ES	1	1	1	1	1	1	1	1	1	1	1	1	1	2	1	3	2	1	1	1	1	1	1	1	-1
1986	573	7	2013	ES	1	1	1	1	1	1	1	1	1	1	1	1	1	1	1	3	1	1	1	1	1	1	1	1	-1
1987	10136	1	2013	ES	1	1	1	1	1	1	1	1	1	1	1	1	1	1	3	3	3	1	1	1	1	1	1	1	-1
1988	168	6	2013	ES	2	3	2	2	1	1	2	1	1	3	1	1	1	1	3	3	2	1	1	2	2	1	1	1	-1
1989	10138	2	2013	ES	1	1	1	1	1	1	1	1	1	1	1	1	1	1	1	3	1	1	1	1	1	4	1	4	-1
1990	10139	2	2013	ES	1	1	1	1	1	1	1	1	1	1	1	1	1	1	1	3	2	1	3	1	1	1	1	1	-1
1991	10140	1	2013	ES	1	1	1	1	1	1	1	1	1	1	1	1	1	1	3	3	2	3	1	1	1	1	1	1	-1
1992	176	7	2013	ES	1	1	1	1	1	1	1	1	1	1	1	1	1	1	1	3	1	1	1	1	1	4	1	4	-1
1993	10142	1	2013	ES	1	1	1	1	1	1	1	1	1	1	1	1	1	1	3	3	2	1	1	3	1	1	1	1	-1
1994	10143	2	2013	ES	1	1	1	1	1	1	1	1	1	1	1	1	1	1	1	1	2	1	1	1	1	1	1	1	-1
1995	10144	1	2013	ES	1	1	1	1	1	1	1	1	1	1	1	1	1	1	1	1	2	1	1	1	1	1	1	1	-1
1996	578	7	2013	ES	1	1	1	1	1	1	1	1	1	1	1	1	1	1	1	3	2	1	1	1	1	1	1	1	-1
1997	178	8	2013	ES	1	1	1	1	1	1	1	1	1	1	1	3	1	1	1	3	2	1	1	1	1	1	1	1	-1
1998	10147	1	2013	ES	1	1	1	1	1	1	1	1	1	1	1	1	1	1	1	1	1	1	1	1	1	1	1	1	-1
1999	10148	1	2013	ES	1	1	1	1	1	1	1	1	1	1	1	1	1	1	1	1	1	1	1	1	1	1	1	1	-1
[truncated: 628 more rows]
